# Supplementary material
Source: publisher figshare collection journal article supplement (https://acs.figshare.com/ndownloader/files/3821458)
Supplement: Supplementary file 1 [file 3821458]

# Supporting Information

*For*

## **Reactivity of Damaged Pyrimidines: Formation of a Schiff Base Intermediate at the Glycosidic Bond of Saturated Dihydrouridine**

Yajun Jian,<sup>†,‡</sup> Gengjie Lin,<sup>†,‡</sup> Lidia Chomicz,<sup>||</sup> and Lei Li <sup>†‡\*</sup>

<sup>†</sup>Department of Chemistry and Chemical Biology, Indiana University-Purdue University  
Indianapolis (IUPUI), 402 North Blackford Street, Indianapolis, Indiana, 46202

<sup>‡</sup>Department of Biochemistry and Molecular Biology and Department of Dermatology, Indiana  
University School of Medicine, 635 Barnhill Drive, Indianapolis, Indiana 46202

<sup>||</sup>Department of Chemistry, University of Gdansk, 80-308 Gdansk, Poland

# Table of Contents

|                                                                                                                                                                             | Page   |
|-----------------------------------------------------------------------------------------------------------------------------------------------------------------------------|--------|
| Abbreviations used                                                                                                                                                          | S3     |
| General Methods                                                                                                                                                             | S3     |
| Preparations of <b>dHdU</b> isomerization products                                                                                                                          | S4     |
| <b>dHdU</b> isomerization reaction at 90 °C in a pH 7.4 buffer                                                                                                              | S5     |
| Isomerization of 2'-deoxyuridine ( <b>dU</b> ) and thymidine ( <b>T</b> ) at pH 1                                                                                           | S6     |
| Isomerization of <b>dU</b> and <b>T</b> at 90 °C in a pH 7.4 buffer                                                                                                         | S7     |
| Preparation of compound <b>5</b>                                                                                                                                            | S9     |
| Nucleophilic addition reaction between <b>cysteine</b> and <b>dHdU</b>                                                                                                      | S9     |
| Preparation of compound <b>8</b> and <b>9</b>                                                                                                                               | S10    |
| <b>dHT</b> isomerization reaction                                                                                                                                           | S11    |
| MS/MS spectra of compounds <b>2</b> , <b>dHdU</b> , <b>3</b> , <b>4</b> , <b>5</b> , <b>6</b> , <b>7</b> , <b>8</b> , <b>9</b> , <b>dHT</b> and the 3 isomers of <b>dHT</b> | S13-18 |
| Gibbs Free Energy changes for a protonated <b>dHT</b> and <b>T</b>                                                                                                          | S19    |
| Rate constants for <b>dHdU</b> isomerization/deglycosylation reaction at pH 7.4                                                                                             | S20    |
| Arrhenius plots for the <b>dHdU</b> reaction                                                                                                                                | S20    |
| NMR spectra of compounds <b>2</b> , <b>dHdU</b> , <b>3</b> , <b>4</b> , <b>5</b> , <b>8</b> , <b>9</b>                                                                      | S21-60 |

## Abbreviations used

Abbreviations for NMR signal coupling are as follows: s, singlet; d, doublet; m, multiplet.

## General Methods

All reagent grade chemicals were purchased from Sigma, Fisher, or VWR and used without further purification. The  $^1\text{H}$  NMR spectra were obtained on a Bruker 500 MHz NMR Fourier transform spectrometer. NMR spectra were recorded in  $d_4$ -methanol, with residual methanol ( $\delta$ 3.31 ppm for  $^1\text{H}$  NMR and  $\delta$ 49.0 ppm for  $^{13}\text{C}$  NMR), in  $d_6$ -dimethyl sulfoxide, with residual dimethyl sulfoxide ( $\delta$  2.50 ppm for  $^1\text{H}$  NMR and  $\delta$ 39.5 ppm for  $^{13}\text{C}$  NMR), or in deuterated water ( $\text{D}_2\text{O}$ ), with residual  $\text{H}_2\text{O}$  ( $\delta$ 4.79 ppm for  $^1\text{H}$  NMR) taken as standards. The chemical shifts on NMR spectra were reported in parts per million (ppm).

HPLC analysis was performed at room temperature with a Waters (Milford, MA) breeze HPLC system coupled to a 2489 UV/Visible detector at 230 nm, while an Agilent ZORBAX Bonus-RP column (5  $\mu\text{m}$  particle size,  $250 \times 4.6$  mm i.d.) was used for separation. Semi-preparative HPLC was performed at room temperature with the same Waters HPLC setup and an XBridge<sup>TM</sup> OST C18 column (2.5  $\mu\text{m}$  particle size,  $50 \times 10$  mm i.d.). The LC/MS and MS/MS analyses were conducted via the Agilent 6520 Accurate Mass Q-TOF LC/MS spectrometer.

## Preparation of dHdU isomerization products

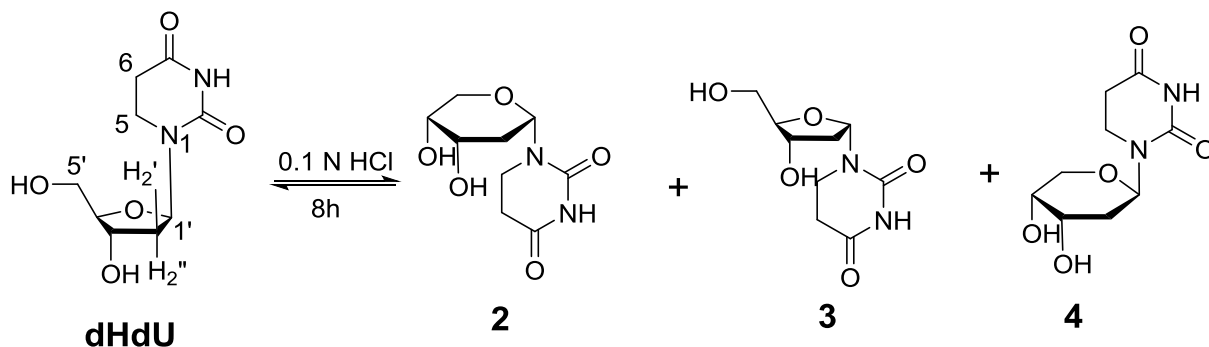

200 mg dHdU was dissolved in 0.1 M HCl and the reaction was allowed to proceed for 8 hours at ambient temperature. HPLC analysis reveals that four products, including three dHdU isomers **2**, **3** and **4** were formed. The products were separated via semi-preparative HPLC. Briefly, an XBridge<sup>TM</sup> OST C18 column (2.5  $\mu$ m particle size, 50  $\times$  10 mm i.d.) was equilibrated with buffer A (10 mM ammonium acetate aqueous solution, pH 7.0); compounds were eluted with an ascending gradient (0%  $\sim$  5%) of acetonitrile (buffer B) in 20 minutes at a flow rate of 4.73 mL/min. The four isomers including dHdU were eluted at 11.0 (**2**), 14.0 (**dHdU**), 14.7 (**3**), and 17.0 (**4**) min respectively. The compounds were desalted by reinjection into HPLC using H<sub>2</sub>O-acetonitrile as elution buffers, then dried by rotary evaporation to afford isomer **2** (30 mg, colorless oil), **3** (18 mg, colorless oil), and **4** (23 mg, colorless oil) respectively.

**2**: <sup>1</sup>H NMR (methanol-*d*<sub>4</sub>):  $\delta$ 1.65-1.70 (m, 1H, H<sub>2'</sub>), 2.07 (q,  $J$  = 11.6 Hz, 1H, H<sub>2''</sub>), 2.61 (dd,  $J$  = 1.4, 6.5 Hz, 1H, H<sub>5</sub>), 2.63 (dd,  $J$  = 2.4, 6.0 Hz, 1H, H<sub>5</sub>), 3.50 (ddd,  $J$  = 6.2, 8.0, 12.8 Hz, 1H, H<sub>6</sub>), 3.62 (ddd,  $J$  = 6.0, 6.9, 12.8 Hz, 1H, H<sub>6</sub>), 3.63 (dd,  $J$  = 1.0, 12.7 Hz, 1H, H<sub>5''</sub>), 3.67-3.70 (m, 1H, H<sub>4'</sub>), 3.84 (ddd,  $J$  = 3.2, 4.7, 11.7 Hz, 1H, H<sub>3'</sub>), 3.95 (dd,  $J$  = 2.1, 12.7 Hz, 1H, H<sub>5'</sub>), 5.43 (dd,  $J$  = 2.2, 11.4 Hz, 1H, H<sub>1'</sub>); <sup>13</sup>C NMR (methanol-*d*<sub>4</sub>):  $\delta$ 32.0, 32.4, 37.5, 68.4, 69.6, 70.2, 81.6, 154.7, 172.8; ESI-MS (positive ion) calcd for C<sub>9</sub>H<sub>15</sub>N<sub>2</sub>O<sub>5</sub><sup>+</sup>: (M + H<sup>+</sup>) 231.0975, found 231.0972.

**dHdU:**  $^1\text{H}$  NMR (methanol- $d_4$ ):  $\delta$ 1.98 (ddd,  $J = 3.2, 6.4, 13.5$ , 1H,  $\text{H}_2''$ ), 2.19 (ddd,  $J = 6.6, 7.9, 13.5$  Hz, 1H,  $\text{H}_2$ ), 2.56-2.67 (m, 2H,  $\text{H}_5$ ), 3.41 (ddd,  $J = 5.6, 8.2, 12.6$ , 1H,  $\text{H}_6$ ), 3.57 (ddd,  $J = 6.2, 6.8, 12.5$  Hz, 1H,  $\text{H}_6$ ), 3.62 (dd,  $J = 4.6, 11.9$  Hz, 1H,  $\text{H}_5''$ ), 3.68 (dd,  $J = 4.0, 11.9$  Hz, 1H,  $\text{H}_5'$ ), 3.77 (dd,  $J = 4.0, 8.0$  Hz, 1H,  $\text{H}_4'$ ), 4.25-4.30 (m, 1H,  $\text{H}_3'$ ), 6.26 (dd,  $J = 6.4, 8.0$  Hz, 1H,  $\text{H}_1'$ );  $^{13}\text{C}$  NMR (methanol- $d_4$ ):  $\delta$ 31.9, 36.9, 37.5, 63.3, 72.4, 85.3, 87.4, 154.9, 172.9; ESI-MS (positive ion) calcd for  $\text{C}_9\text{H}_{15}\text{N}_2\text{O}_5^+$ : ( $\text{M} + \text{H}^+$ ) 231.0975, found: 231.0969.

**3:**  $^1\text{H}$  NMR (methanol- $d_4$ ):  $\delta$ 1.93 (ddd,  $J = 5.0, 5.0, 10.0$ , 1H,  $\text{H}_2''$ ), 2.52 (ddd,  $J = 7.1, 7.2, 14.1$  Hz, 1H,  $\text{H}_2'$ ), 2.63 (t,  $J = 6.7$  Hz, 2H,  $\text{H}_5$ ), 3.52 (dd,  $J = 5.0, 12.0$  Hz, 1H,  $\text{H}_5''$ ), 3.56-3.67 (m, 3H,  $\text{H}_5'$  and  $\text{H}_6$ ), 4.00 (dd,  $J = 4.0, 8.5$  Hz, 1H,  $\text{H}_4'$ ), 4.29 (ddd,  $J = 4.1, 4.3, 6.9$  Hz, 1H,  $\text{H}_3'$ ), 6.16 (dd,  $J = 5.5, 7.6$  Hz, 1H,  $\text{H}_1'$ );  $^{13}\text{C}$  NMR (methanol- $d_4$ ):  $\delta$ 32.0, 37.4, 39.1, 63.4, 72.2, 86.1, 88.6, 154.9, 173.0; ESI-MS (positive ion) calcd for  $\text{C}_9\text{H}_{15}\text{N}_2\text{O}_5^+$ : ( $\text{M} + \text{H}^+$ ) 231.0975, found: 231.0975.

**4:**  $^1\text{H}$  NMR (methanol- $d_4$ ):  $\delta$ 1.81 (ddd,  $J = 2.4, 3.8, 13.8$  Hz, 1H,  $\text{H}_2''$ ), 2.52 (ddd,  $J = 2.4, 11.2, 13.6$  Hz, 1H,  $\text{H}_2$ ), 2.60 (t,  $J = 6.9$  Hz, 2H,  $\text{H}_5$ ), 3.40-3.53 (m, 2H,  $\text{H}_6$ ), 3.63-3.71 (m, 2H,  $\text{H}_4'$  and  $\text{H}_5''$ ), 3.75-3.81 (m, 1H,  $\text{H}_5'$ ), 4.11-4.15 (m, 1H,  $\text{H}_3'$ ), 5.84 (dd,  $J = 2.2, 11.4$  Hz, 1H,  $\text{H}_1'$ );  $^{13}\text{C}$  NMR (methanol- $d_4$ ):  $\delta$ 32.0, 35.3, 37.4, 66.8, 68.0, 68.4, 78.4, 154.7, 172.8; ESI-MS (positive ion) calcd for  $\text{C}_9\text{H}_{15}\text{N}_2\text{O}_5^+$ : ( $\text{M} + \text{H}^+$ ) 231.0975, found: 231.0973.

**dHdU isomerization reaction at 90 °C in a pH 7.4 buffer** dHdU was dissolved in 200  $\mu\text{L}$  pH 7.4 sodium phosphate buffer containing 150 mM NaCl to a final concentration of 85 mM. The solution was heated to 90 °C using a PCR device with a cap heating function to minimize water evaporation. At various reaction times, 5  $\mu\text{L}$  solution was aliquotted out, immediately frozen in liquid  $\text{N}_2$ , and saved in  $-20$  °C freezer for future HPLC analysis. In HPLC analysis,

briefly, an Agilent ZORBAX Bonus-RP column (5  $\mu\text{m}$  particle size,  $250 \times 4.6$  mm i.d.) was equilibrated with buffer A (10 mM ammonium acetate aqueous solution, pH 7.0); compounds were eluted with an ascending gradient (0% ~ 5%) of acetonitrile (buffer B) in 20 minutes at a flow rate of 0.5 mL/min. Under such a condition, **1** (5,6-dihydrouracil), **2**, dHdU, **3** and **4** eluted at 8.6, 11.0, 14.0, 14.7, and 17.0 min respectively.

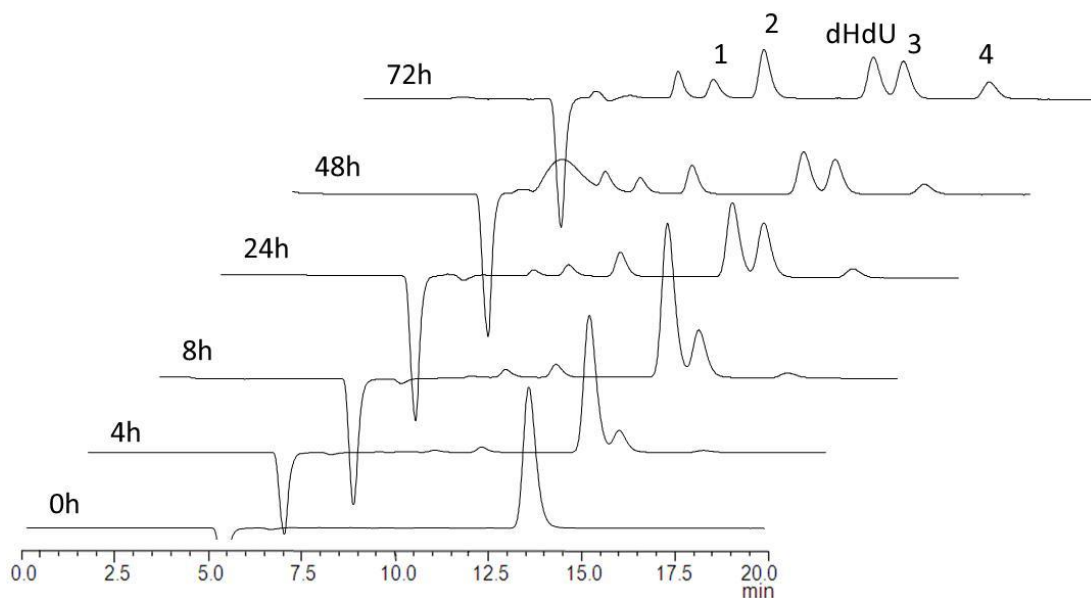

**Figure S1.** HPLC chromatogram (monitored at 230 nm) of the dHdU isomerization reaction in a pH 7.4 buffer at 90°C for 72 hrs.

**Isomerization of 2'-deoxyuridine (dU) and thymidine (T) at pH 1** dU and T were dissolved respectively in 200  $\mu\text{L}$  0.1 M HCl to a final concentration of 85 mM. The resulting solutions were kept at room temperature for ~ 3 days. At various times, 5  $\mu\text{L}$  of the reaction solution was aliquotted out, immediately frozen in liquid  $\text{N}_2$  and saved in  $-20$  °C freezer for future HPLC analysis. In HPLC analysis, an Agilent ZORBAX Bonus-RP column (5  $\mu\text{m}$  particle size,  $250 \times 4.6$  mm i.d.) was equilibrated with buffer A (10 mM ammonium acetate aqueous solution, pH 7.0). For dU isomerization reaction, an ascending gradient (0% ~ 5%) of

acetonitrile (buffer B) in 20 minutes at a flow rate of 1 mL/min was used and **dU** was eluted at 10.3 min. For **T** isomerization reaction, an ascending gradient (0% ~ 20%) of acetonitrile (buffer B) in 20 minutes at a flow rate of 1 mL/min was used and **T** was eluted at 11.4 min. No product was observed in either reaction.

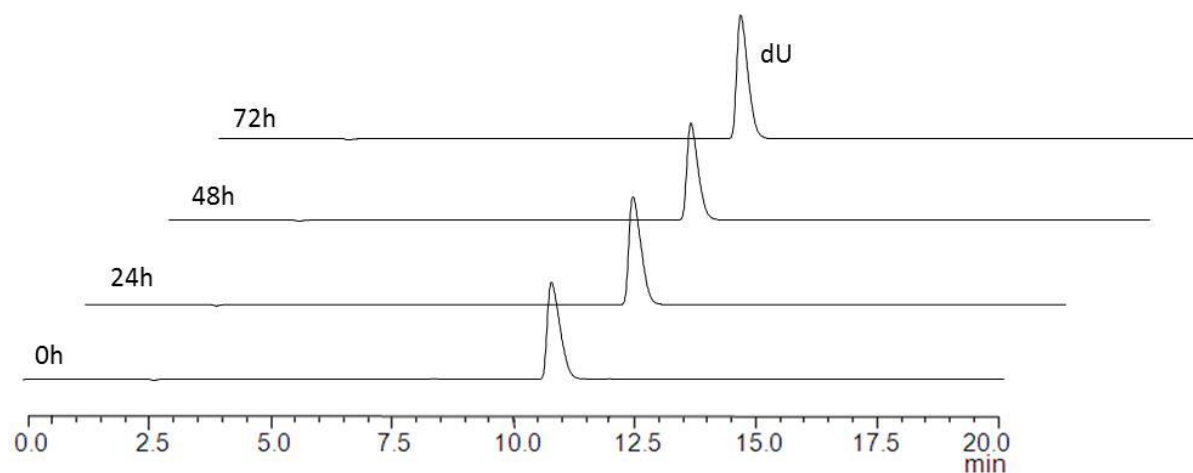

**Figure S2.** HPLC chromatogram (monitored at 230 nm) of the **dU** isomerization reaction in the presence of 0.1 M HCl at ambient temperature for 72 hrs.

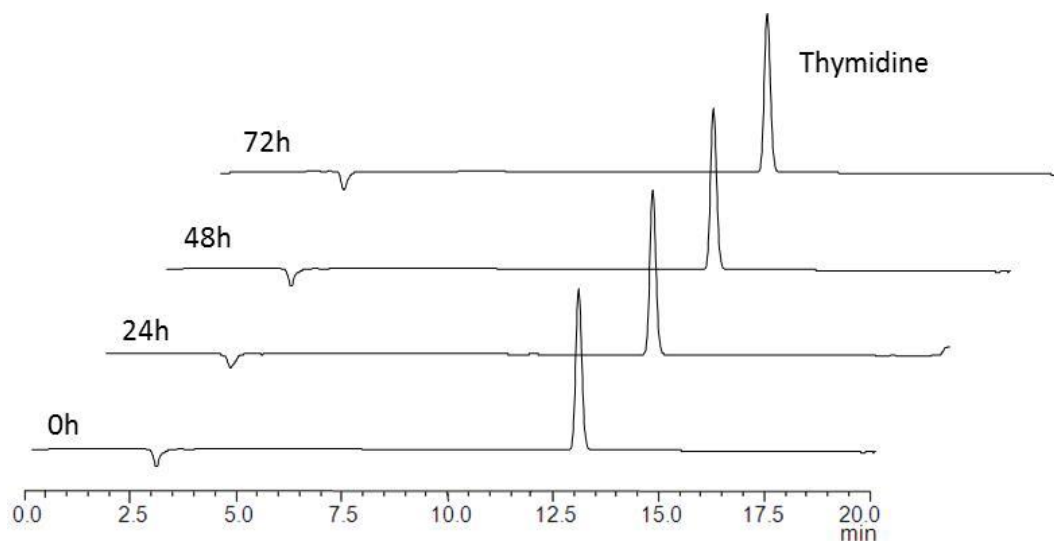

**Figure S3.** HPLC chromatogram (monitored at 230 nm) of the **T** isomerization reaction in the presence of 0.1 M HCl at ambient temperature for 72 hrs.

**Isomerization of dU and T at 90 °C in a pH 7.4 buffer** dU and T were dissolved respectively in 200  $\mu$ L pH 7.4 sodium phosphate buffer containing 150 mM NaCl to a final concentration of 85 mM. The solution was heated to 90 °C using a PCR device with a cap heating function to minimize water evaporation. At various reaction times, 5  $\mu$ L solution was aliquotted out, immediately frozen in liquid N<sub>2</sub>, and saved in -20 °C freezer for future HPLC analysis. In HPLC analysis, briefly, an Agilent ZORBAX Bonus-RP column (5  $\mu$ m particle size, 250  $\times$  4.6 mm i.d.) was equilibrated with buffer A (10 mM ammonium acetate aqueous solution, pH 7.0). For **dU** isomerization reaction, an ascending gradient (0% ~ 5%) of acetonitrile (buffer B) in 20 minutes at a flow rate of 1 mL/min was used; **uracil** and **dU** were eluted at 5.1 and 10.3 min respectively. For **T** isomerization reaction, an ascending gradient (0% ~ 20%) of acetonitrile (buffer B) in 20 minutes at a flow rate of 1 mL/min was used; **thymine** and **T** were eluted at 8.3 and 11.4 min respectively. No isomers of dU or T were observed.

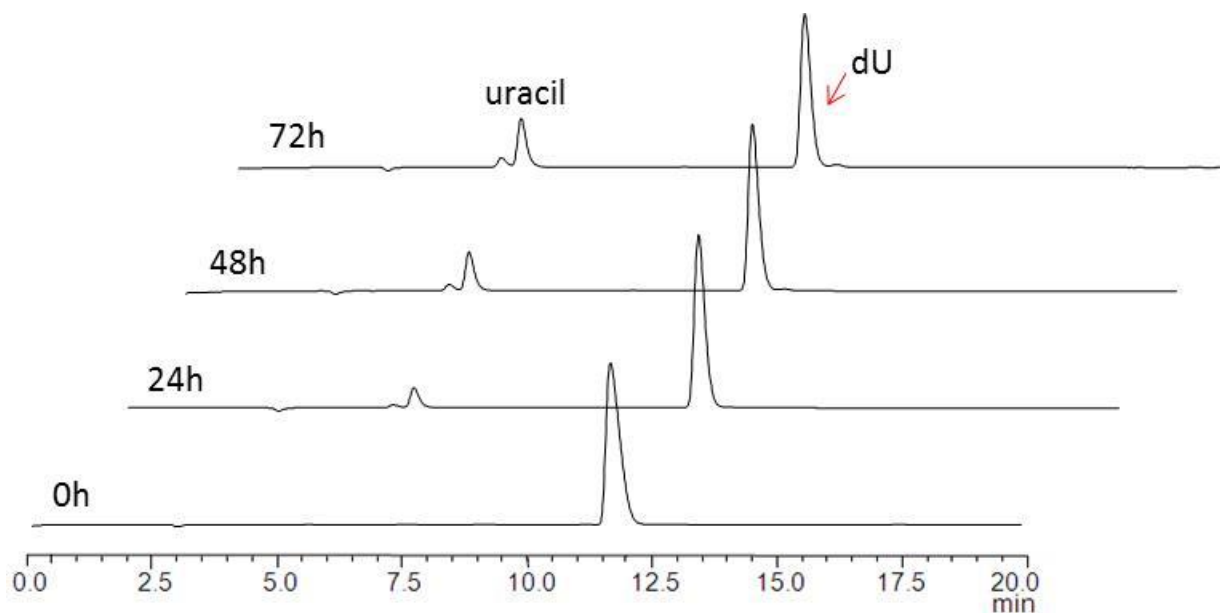

**Figure S4.** HPLC chromatogram (monitored at 230 nm) of the **dU** isomerization reaction in a pH 7.4 buffer at 90°C for 72 hrs.



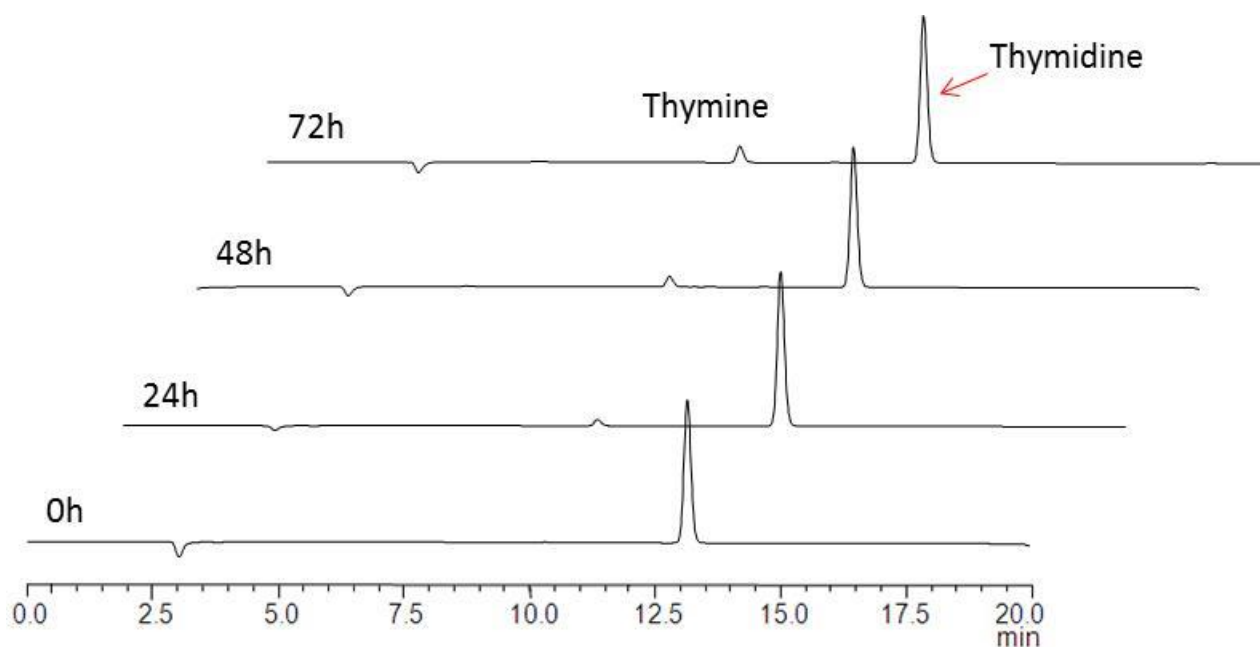

**Figure S5.** HPLC chromatogram (monitored at 230 nm) of the **T** isomerization reaction in a pH 7.4 buffer at 90°C for 72 hrs.

#### Preparation of compound **5**

dHdU (50 mg, 0.22 mmol) was dissolved in 0.1 M HCl in MeOH:H<sub>2</sub>O (1:1, v/v) solution to a final concentration of 5 mM (44 mL); 50 mg Pd-C was then added to the solution. The resulting suspension was stirred under 1 atm H<sub>2</sub> for 8 days at ambient temperature. At various time points, 5  $\mu$ L of the reaction mixture was extracted, and immediately analyzed by HPLC until ~85% dHdU was consumed. After removing the Pd-C catalyst by filtration, the product was purified by semi-preparative HPLC. Briefly, an XBridge<sup>TM</sup> OST C18 column (2.5  $\mu$ m particle size, 50  $\times$  10 mm i.d.) was equilibrated with buffer A (10 mM ammonium acetate aqueous solution, pH 7.0). Compounds were eluted with an ascending gradient (0% ~ 5%) of acetonitrile (buffer B) in 20 minutes at a flow rate of 4.73 mL/min. The dHdU Schiff base hydrogenation product **5** was eluted at 6.1 min. After removing solvent via rotary evaporation, **5** was obtained as a white solid (38 mg, 75%). <sup>1</sup>H NMR (methanol-*d*<sub>4</sub>):  $\delta$ 1.58-1.67 (m, 1H), 1.98-2.08 (m, 1H), 2.62-2.73 (m,

2H), 3.44-3.58 (m, 5H), 3.59-3.68 (m, 2H), 3.73 (dd,  $J = 3.9, 11.3$  Hz, 1H);  $^{13}\text{C}$  NMR (methanol- $d_4$ ):  $\delta$ 31.81, 31.87, 43.4, 45.6, 64.7, 70.9, 76.3, 155.3, 173.1; ESI-MS (positive ion) calcd for  $\text{C}_9\text{H}_{17}\text{N}_2\text{O}_5^+$ : ( $\text{M} + \text{H}^+$ ) 233.1132, found: 233.1129.

**Nucleophilic addition reaction between cysteine and dHdU** dHdU was dissolved in  $\text{H}_2\text{O}$  to a final concentration of 85mM. To this solution, 75-fold cysteine·HCl was added followed by the addition of 1 N HCl to adjust the pH to 3. The resulting solution was allowed to react at 37 °C. At various times, 5  $\mu\text{L}$  of the reaction mixture was extracted, and immediately analyzed by HPLC. Briefly, an Agilent ZORBAX Bonus-RP column (5  $\mu\text{m}$  particle size,  $250 \times 4.6$  mm i.d.) was equilibrated with buffer A (10 mM triethylamine-Acetic Acid aqueous solution, pH 7.0); compounds were eluted with an ascending gradient (0% ~ 5%) of acetonitrile in 20 minutes at a flow rate of 0.5 mL/min. The cysteine-dHdU adducts **6** and **7**, and dHdU deglycosylation product **1**, were eluted at 6.3, 7.1, and 8.7 min respectively.

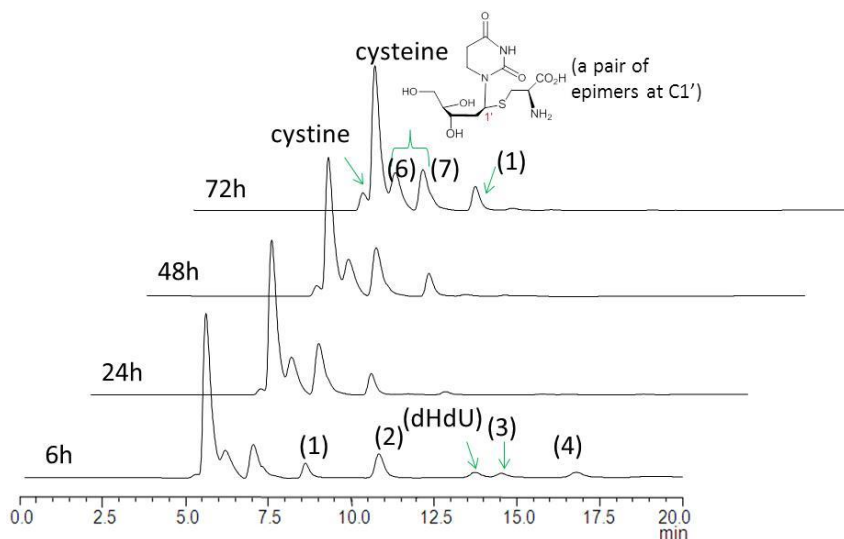

**Figure S6.** HPLC chromatogram (monitored at 230 nm) of Schiff base intermediate-mediated nucleophilic addition reaction between cysteine and dHdU at 37 °C for 72 hrs.

## Preparation of compounds 8 and 9

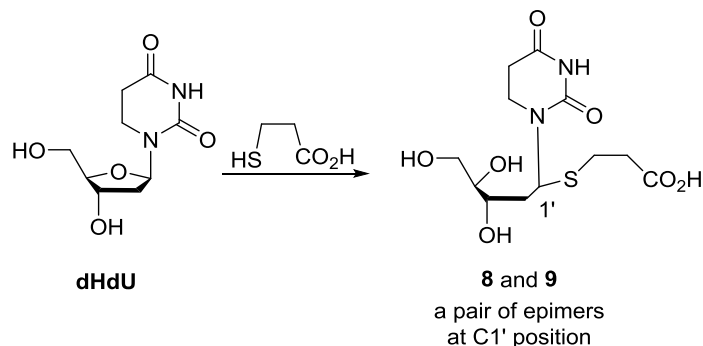

dHdU (20 mg, 85 $\mu$ mol) was dissolved in H<sub>2</sub>O to a final concentration of 60 mM. To this solution, 3-mercaptopropionic acid HSCH<sub>2</sub>CH<sub>2</sub>CO<sub>2</sub>H (75X) was added. The resulting solution was kept at 60°C for 24 h. 5  $\mu$ l of the reaction mixture was extracted and immediately analyzed by HPLC to confirm that 85% of the dHdU added has reacted.

The resulting mixture was then purified by preparative HPLC. Briefly, an XBridge™ OST C18 column (2.5  $\mu$ m particle size, 50  $\times$  10 mm i.d.) was equilibrated with buffer A (triethylamine-Acetic Acid aqueous solution, pH 7.0). Compounds were eluted with an ascending gradient (0% ~ 5%) of acetonitrile in 20 minutes at a flow rate of 2.37 mL/min. Under such a condition, **dHdU-MPA** adducts **8** and **9** were eluted at 15.8 and 16.4 min respectively. After removing solvent via rotary evaporation, **8** (10 mg, 30%) and **9** (18 mg, 56%) were obtained both as colorless gel.

**8**: <sup>1</sup>H NMR (methanol-*d*<sub>4</sub>):  $\delta$ 1.66(ddd, *J* = 3.5, 9.8, 14.6 Hz, 1H, H<sub>2'</sub>), 2.14 (dd, *J* = 12.5, 14.6 Hz, 1H, H<sub>2'</sub>), 2.42 (ddd, *J* = 7.5, 7.5, 15.3 Hz, 1H, H<sub>b</sub>), 2.52 (ddd, *J* = 6.3, 8.0, 14.1 Hz, 1H, H<sub>b</sub>), 2.61-2.76 (m, 3H, H<sub>c</sub> and H<sub>5</sub>), 2.80 (ddd, *J* = 6.2, 8.0, 13.1 Hz, 1H, H<sub>c</sub>), 3.34 (ddd, *J* = 5.3, 8.7, 13.1 Hz, 1H, H<sub>6</sub>), 3.37-3.44 (m, 2H, H<sub>3'</sub> and H<sub>4'</sub>), 3.57 (dd, *J* = 5.4, 11.2 Hz, 1H, H<sub>5'</sub>), 3.66 (dd, *J*

= 6.7, 12.5 Hz, 1H, H<sub>6</sub>), 3.68 (dd,  $J$  = 3.2, 11.0 Hz, 1H, H<sub>5'</sub>), 5.97 (dd,  $J$  = 3.1, 11.9 Hz, 1H, H<sub>1'</sub>); <sup>13</sup>C NMR (methanol-*d*<sub>4</sub>): δ28.4, 31.8, 36.8, 37.0, 38.7, 57.8, 64.5, 69.9, 75.9, 155.5, 172.8, 179.7; ESI-MS (negative ion) calcd for C<sub>12</sub>H<sub>19</sub>N<sub>2</sub>O<sub>7</sub>S(M-H)<sup>-</sup>: 335.0918, found: 335.0916;

**9:** <sup>1</sup>H NMR (methanol-*d*<sub>4</sub>): δ1.70 (ddd,  $J$  = 6.0, 9.7, 11.2 Hz, 1H, H<sub>2'</sub>), 2.07 (ddd,  $J$  = 2.5, 8.9, 11.5 Hz, 1H, H<sub>2'</sub>), 2.40-2.55 (m, 2H, H<sub>b</sub>), 2.61-2.77 (m, 3H, H<sub>a</sub> and 2 H<sub>5</sub>), 2.80 (ddd,  $J$  = 6.8, 6.8, 13.0 Hz, 1H, H<sub>a</sub>), 3.37-3.44 (m, 2H, H<sub>4'</sub> and H<sub>6</sub>), 3.56 (dd,  $J$  = 6.3, 11.3 Hz, 1H, H<sub>5'</sub>), 3.65-3.75 (m, 3H, H<sub>3'</sub>, H<sub>5'</sub> and H<sub>6</sub>), 5.94 (dd,  $J$  = 6.1, 8.9 Hz, 1H, H<sub>1'</sub>); <sup>13</sup>C NMR (methanol-*d*<sub>4</sub>): δ28.3, 31.9, 37.5, 37.8, 38.5, 59.2, 64.6, 71.0, 76.4, 154.9, 172.9, 179.5; ESI-MS (negative ion) calcd for C<sub>12</sub>H<sub>19</sub>N<sub>2</sub>O<sub>7</sub>S(M-H)<sup>-</sup>: 335.0918, found: 335.0916.

**dHT isomerization reaction** dHT was dissolved in 200 μL 0.1 M HCl to a final concentration of 85 mM. The resulting solution was kept at room temperature for ~ 3 days. At various times, 5 μL of the reaction solution was aliquotted out, immediately frozen in liquid N<sub>2</sub> and saved in -20 °C freezer for future HPLC analysis. For HPLC analysis, briefly, an Agilent ZORBAX Bonus-RP column (5 μm particle size, 250 × 4.6 mm i.d.) was equilibrated with buffer A (10 mM ammonium acetate aqueous solution, pH 7.0). Compounds were eluted with an ascending gradient (0% ~ 5%) of acetonitrile (buffer B) in 20 minutes at a flow rate of 1 mL/min. The four isomers of **dHT** were eluted at 8.8 (**10**), 10.8 (**dHT**), 11.6 (**11**), and 14.1 (**12**) min respectively. These products were characterized by MS/MS analysis.

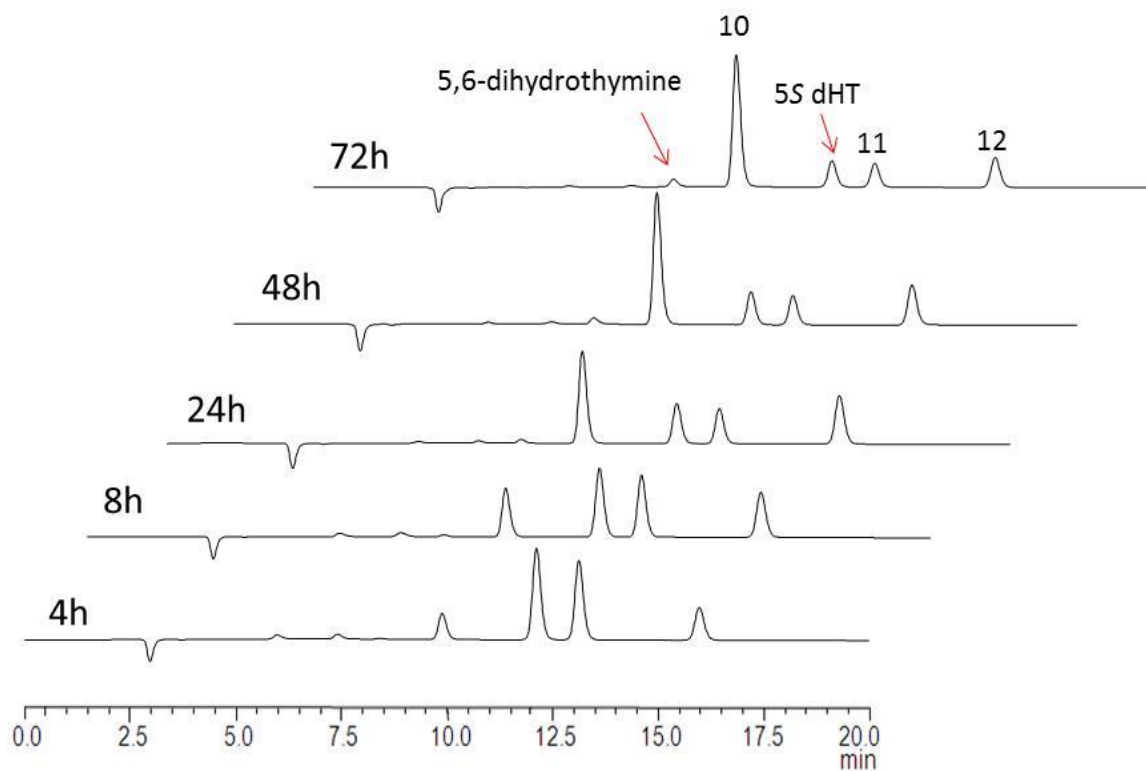

**Figure S7.** HPLC chromatogram (monitored at 230 nm) of the **dHT** isomerization reaction in the presence of 0.1 M HCl at ambient temperature for 72 hrs.

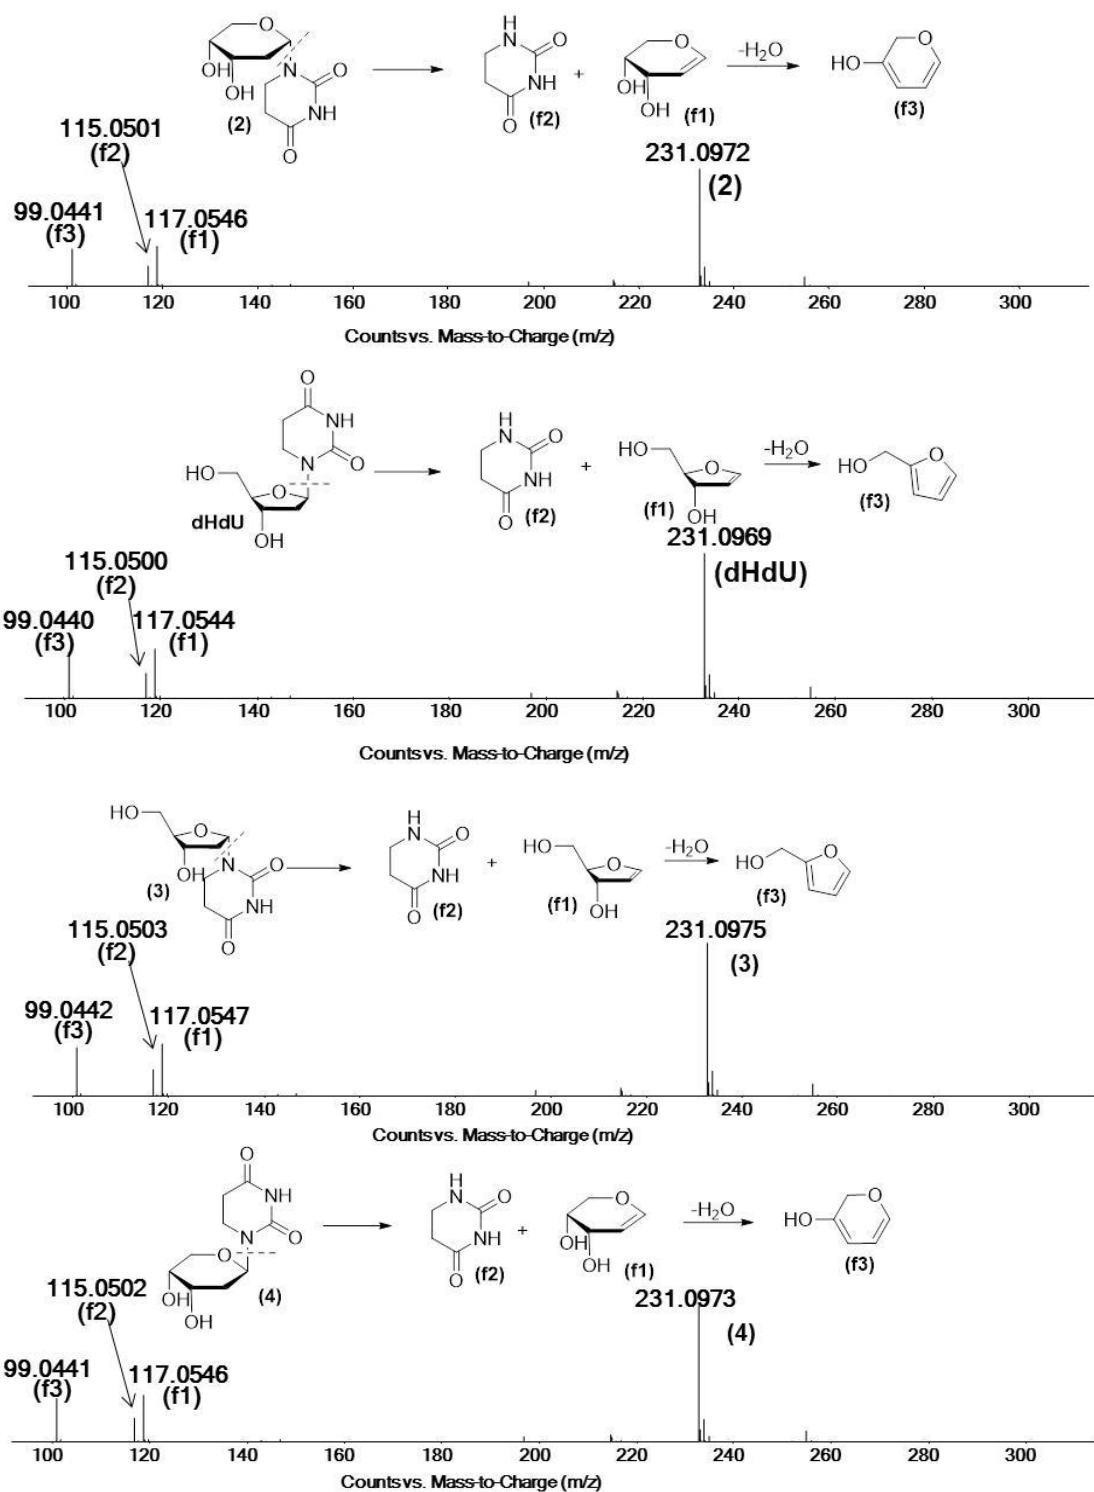

**Figure S8.** MS-MS spectra and the fragment structures of compounds **2**, **dHdU**, **3** and **4** under positive ion mode.

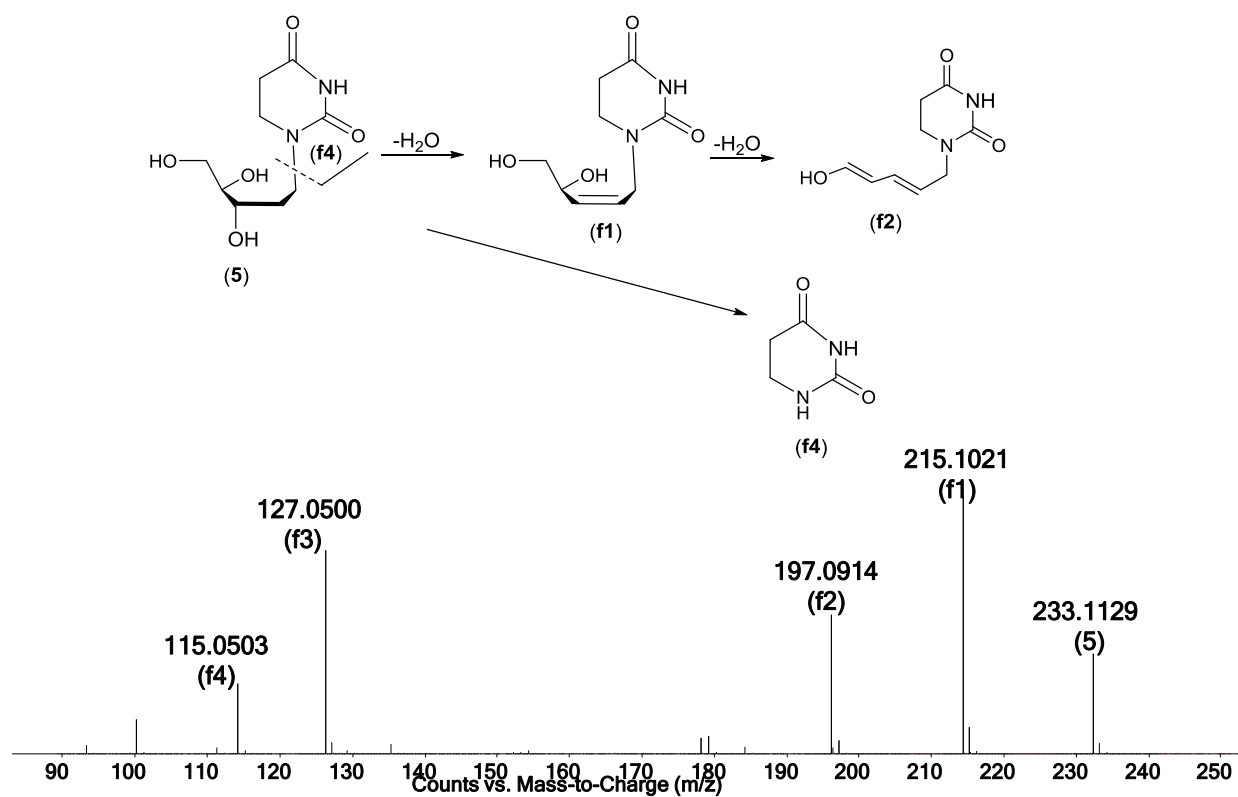

**Figure S9.** MS-MS spectrum and the fragment structures of compound **5** under positive ion mode.

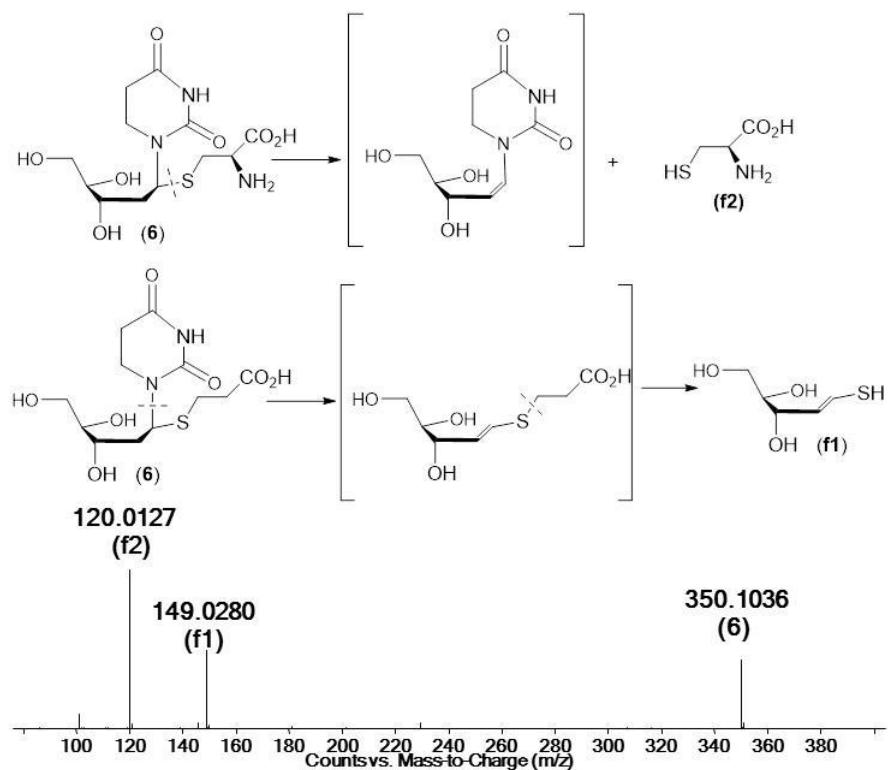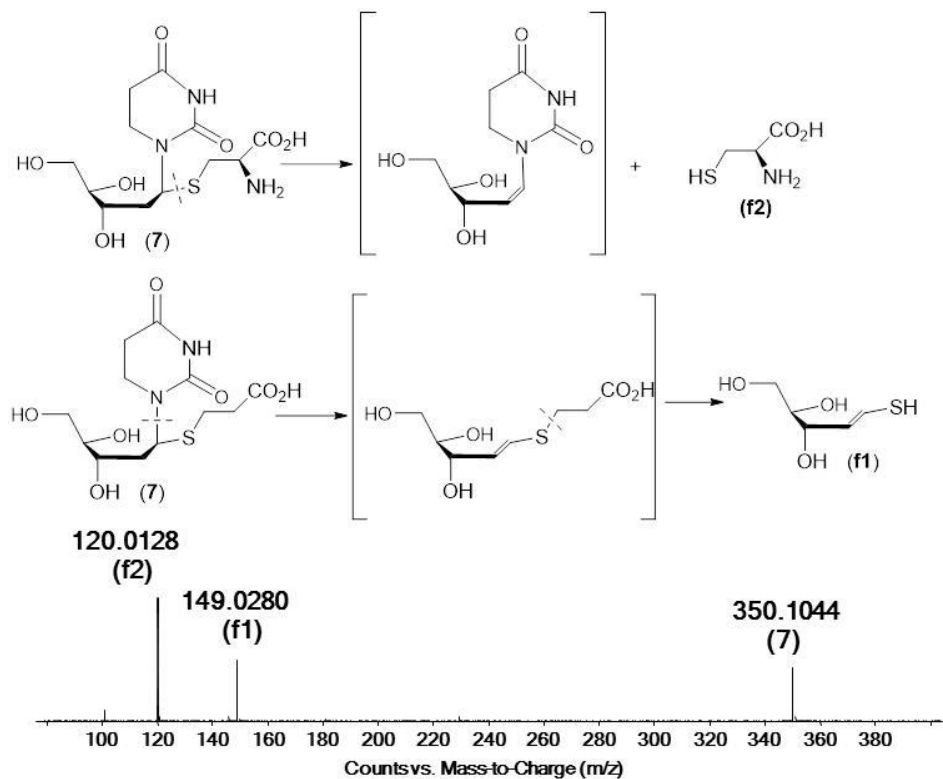

**Figure S10.** MS-MS spectrum and fragment structures of compounds **6** and **7** under negative ion mode.



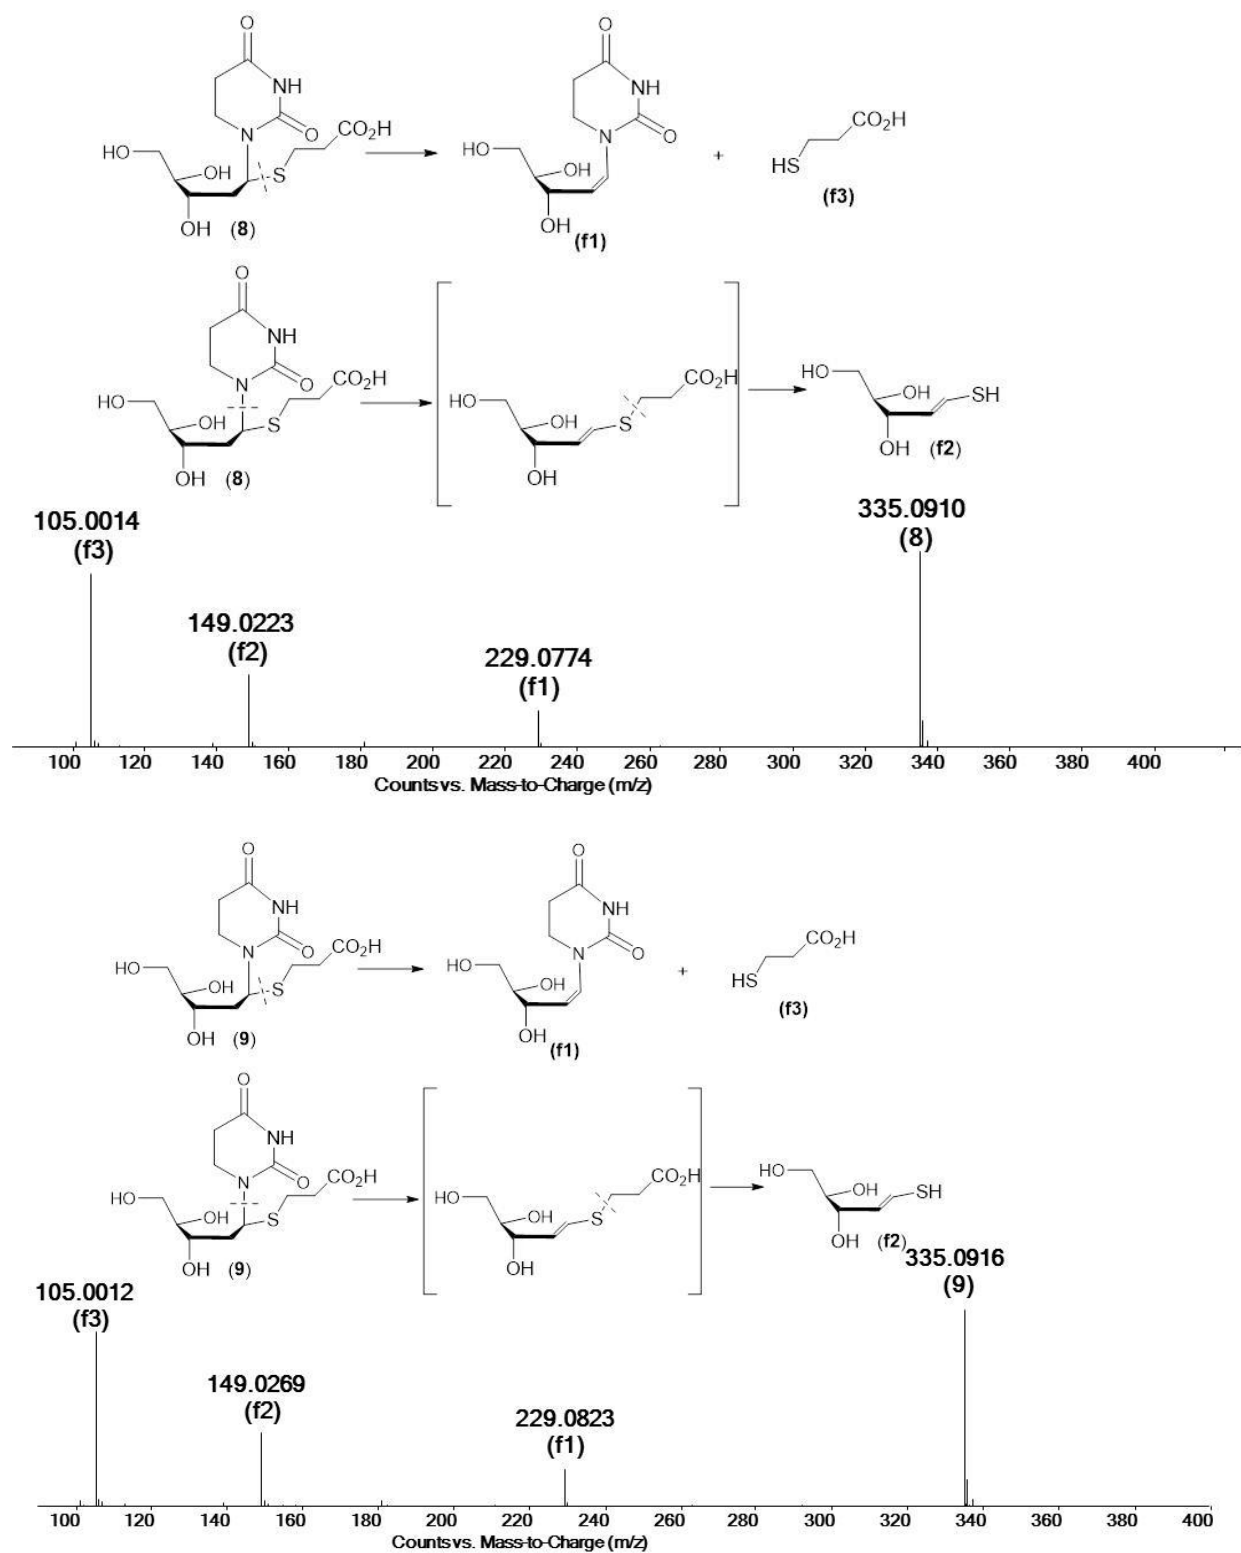

**Figure S11.** MS-MS spectrum and fragment structures of compounds **8** and **9** under negative ion mode.

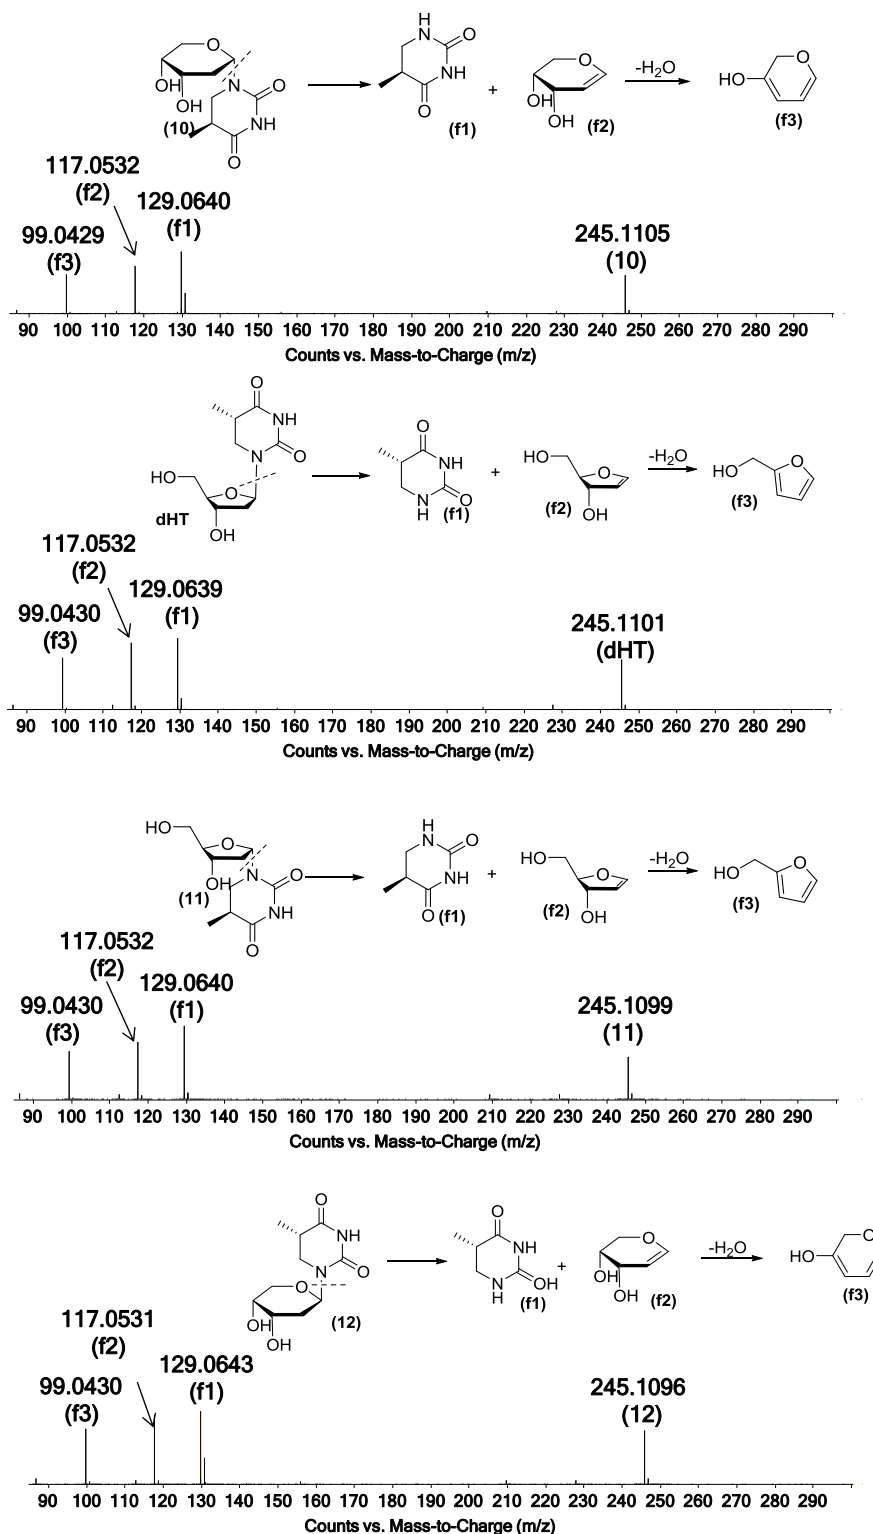

**Figure S12.** MS/MS spectrum and the fragment structures of dHT and its 3 isomers (formed under acidic conditions) under positive ion mode.

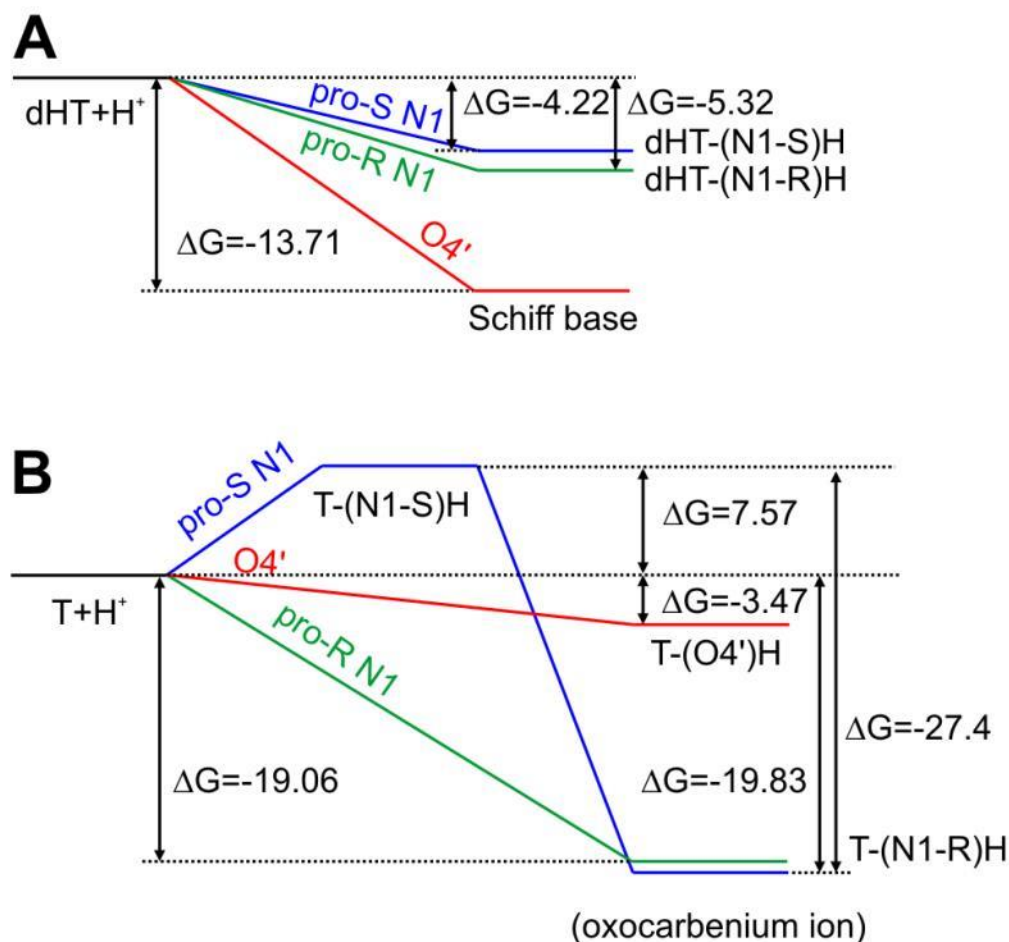

**Figure S13.** (A) Gibbs Free Energy changes (kcal/mol) for dHT protonation and decomposition. The N1 protonation may result in two putative species (N1-R)H and (N1-S)H, which are much higher in Gibbs Free Energy than the (O4')H, suggesting that in dHT, protonation at O4' is preferred. The (O4')H re-arranges into a Schiff base species via a barrier-free decomposition during the structure optimization. (B) Gibbs Free Energy changes (kcal/mol) for T protonation and decomposition. The N1-R protonation is preferred, the resulting (N1-R)H is unstable, which decays into the oxocarbenium ion via a barrier-free transformation process. In contrast, the T-(O4')H is much higher in Gibbs Free Energy, implying that T deglycosylation is mediated by the oxocarbenium ion pathway via (N1-R)H. The putative (N1-S)H intermediate however is found to be metastable as a local minimum on the potential energy surface. The (N1-S)H pathway however is considered to be irrelevant to the oxocarbenium ion formation because of the high Gibbs Free Energy barrier en route to (N1-S)H.

**Table S1.** Rate constants ( $\times 10^{-9} \text{ s}^{-1}$ ) for the formations of **1**, **2**, **3**, and **4** in the dHdU isomerization reaction determined via HPLC integration. The respective rate constants at 37 °C and pH 7.4 were then deduced from the Arrhenius plots below.

| Temperature | <b>1</b> | <b>2</b>           | <b>3</b>           | <b>4</b> |
|-------------|----------|--------------------|--------------------|----------|
| 70          | 26.5     | 267                | $1.69 \times 10^3$ | 115      |
| 75          | 31.3     | 395                | $2.51 \times 10^3$ | 190      |
| 80          | 51.3     | 673                | $3.55 \times 10^3$ | 299      |
| 85          | 105      | $1.07 \times 10^3$ | $6.22 \times 10^3$ | 585      |
| 90          | 126      | $1.68 \times 10^3$ | $9.72 \times 10^3$ | 919      |
| <u>37</u>   | 0.819    | 6.98               | 53.6               | 1.86     |

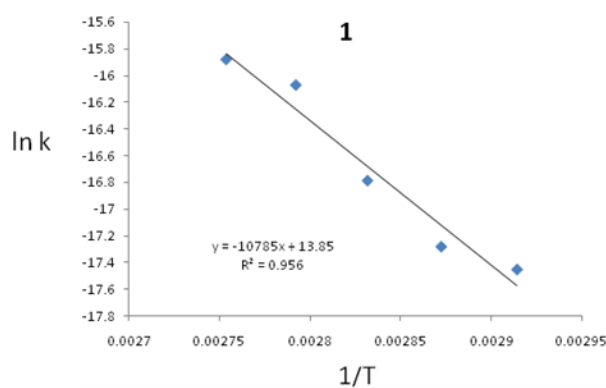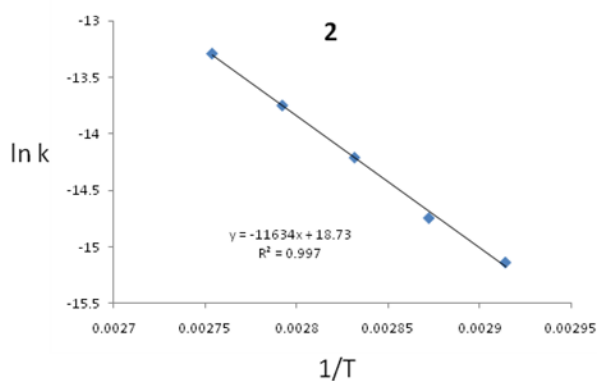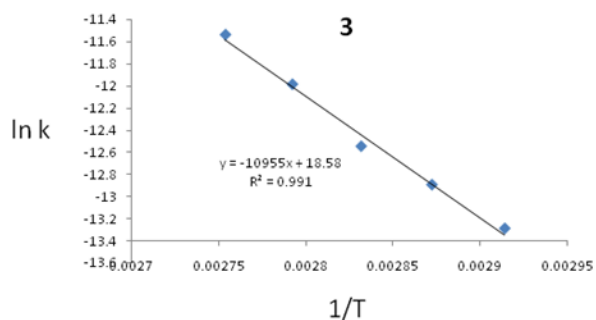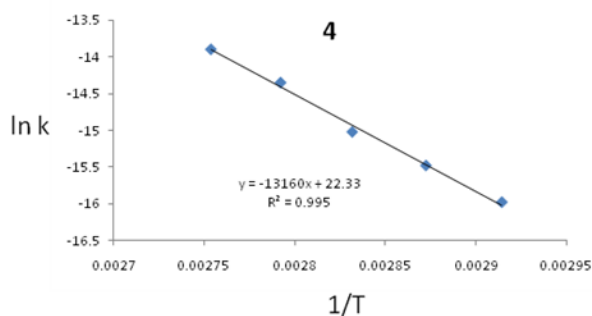

**Figure S14.** Arrhenius plots for the formations of **1**, **2**, **3**, and **4** in the dHdU isomerization reaction (lnk vs 1/T).

dHU\_b\_MeOD 08152014

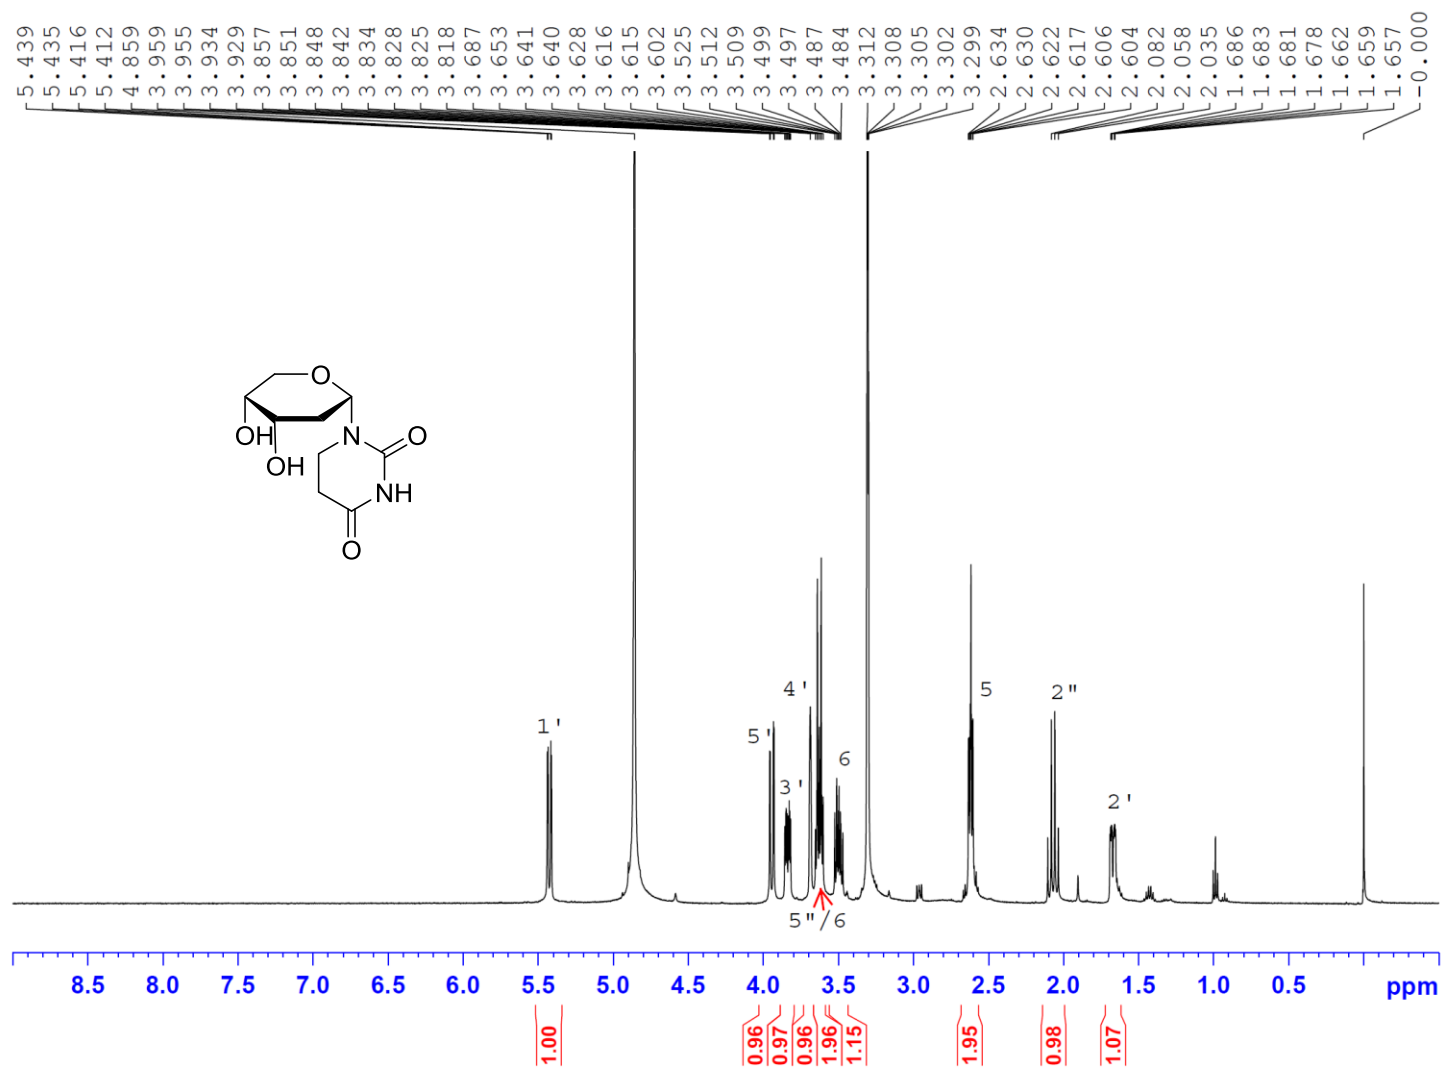

**Figure S15.**  $^1\text{H}$  NMR spectrum of compound **2**.

dHU\_b\_MeOD C 08152014

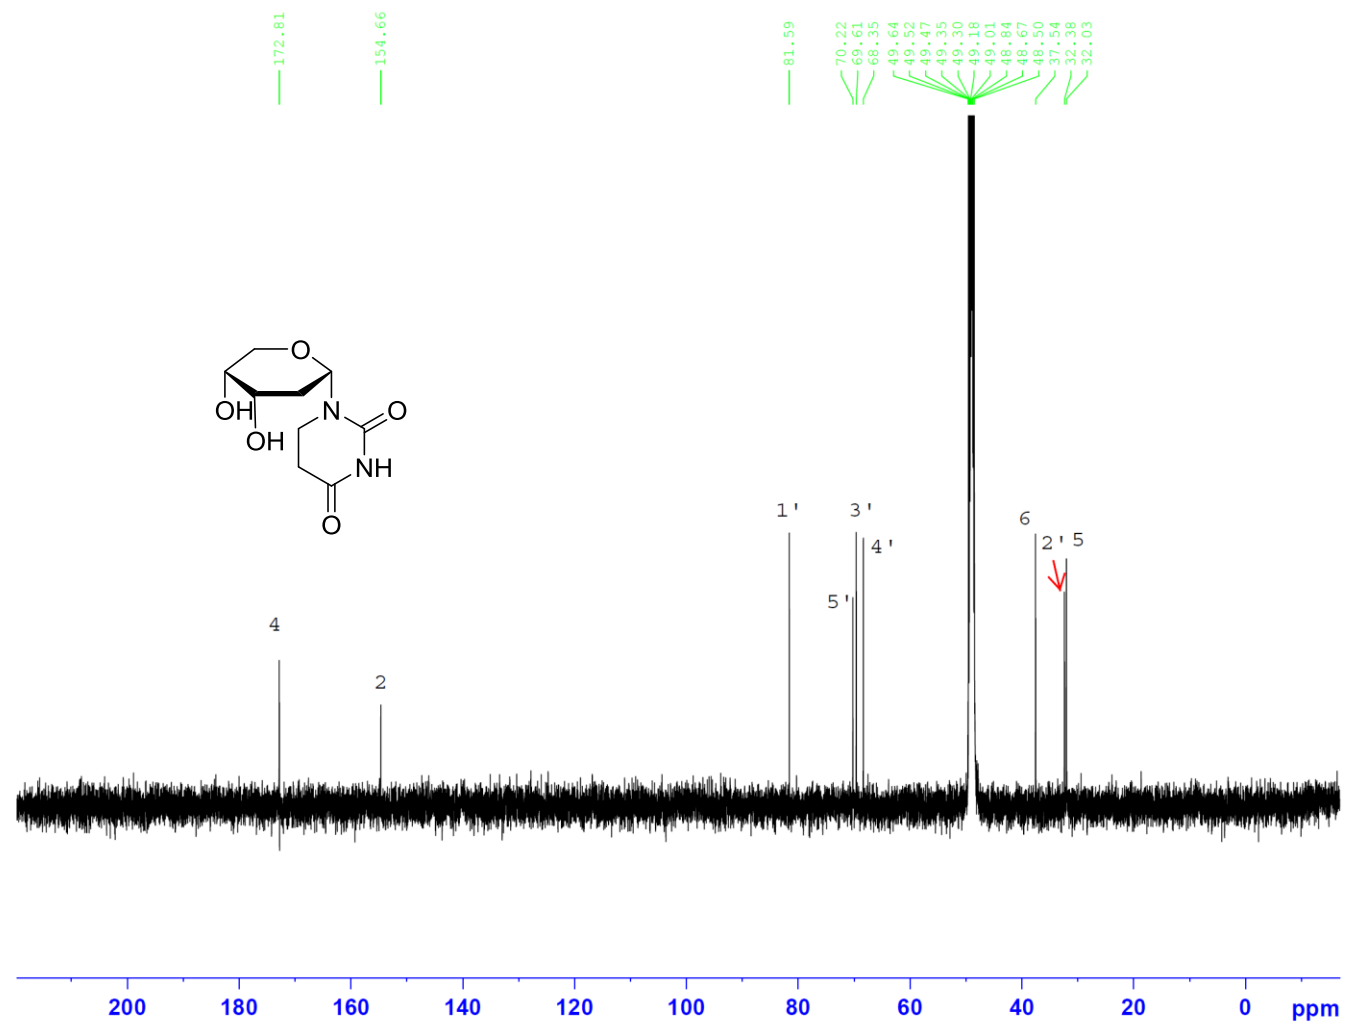

**Figure S16.** <sup>13</sup>C NMR spectrum of compound 2.

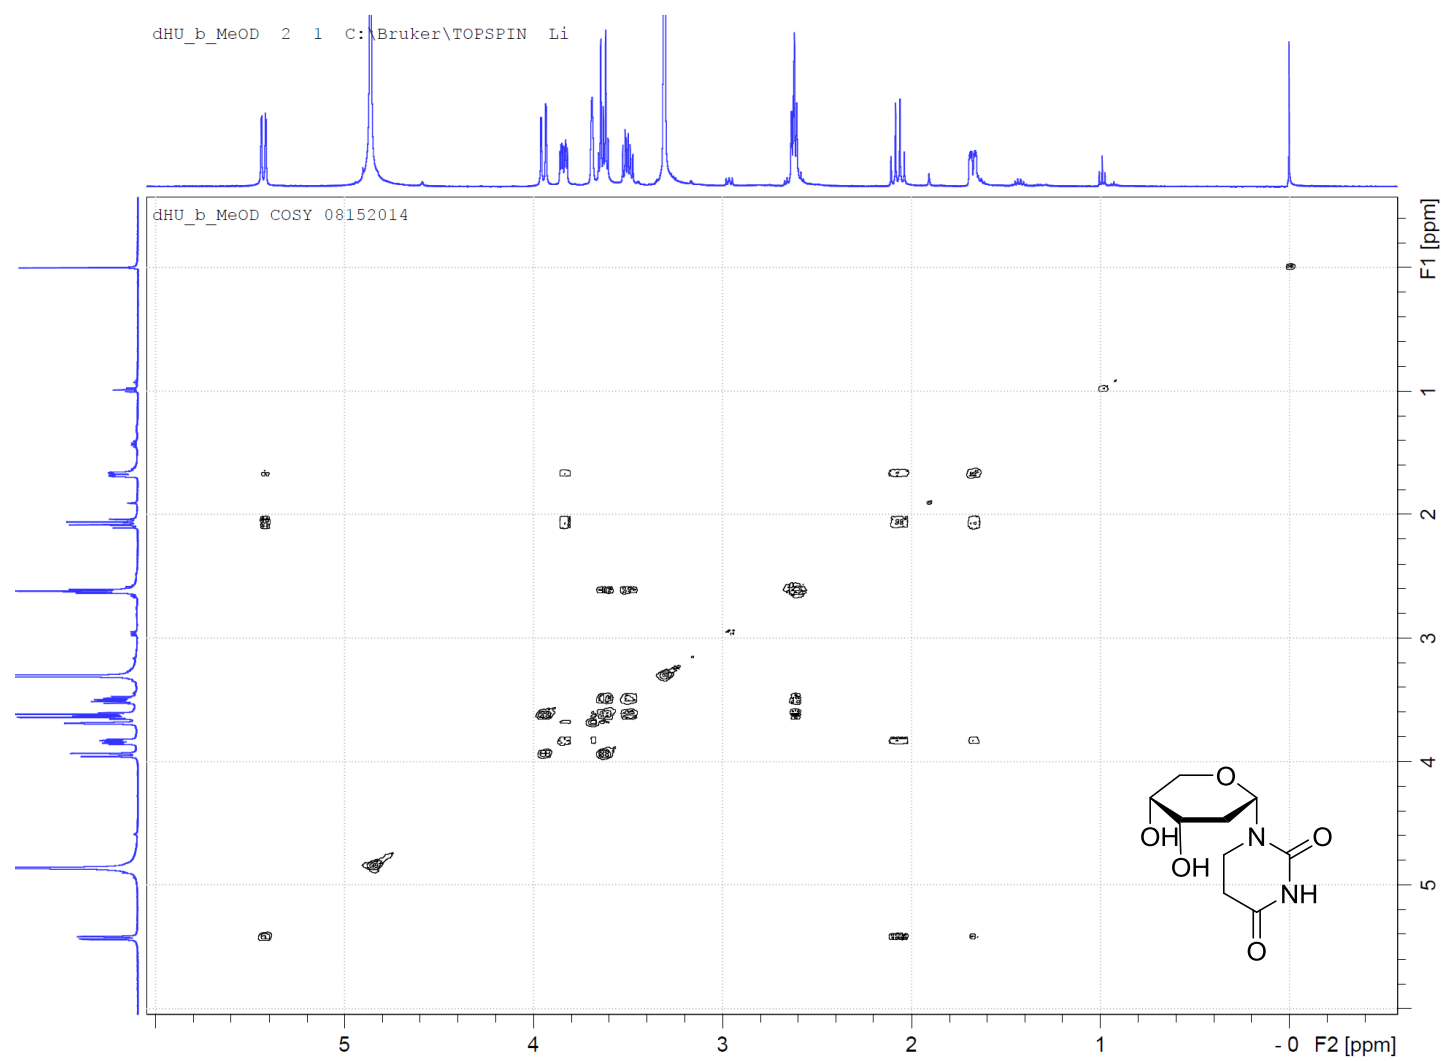

**Figure S17.** COSY spectrum of compound 2.

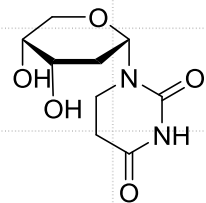

**Figure S18.** HSQC spectrum of compound **2**.



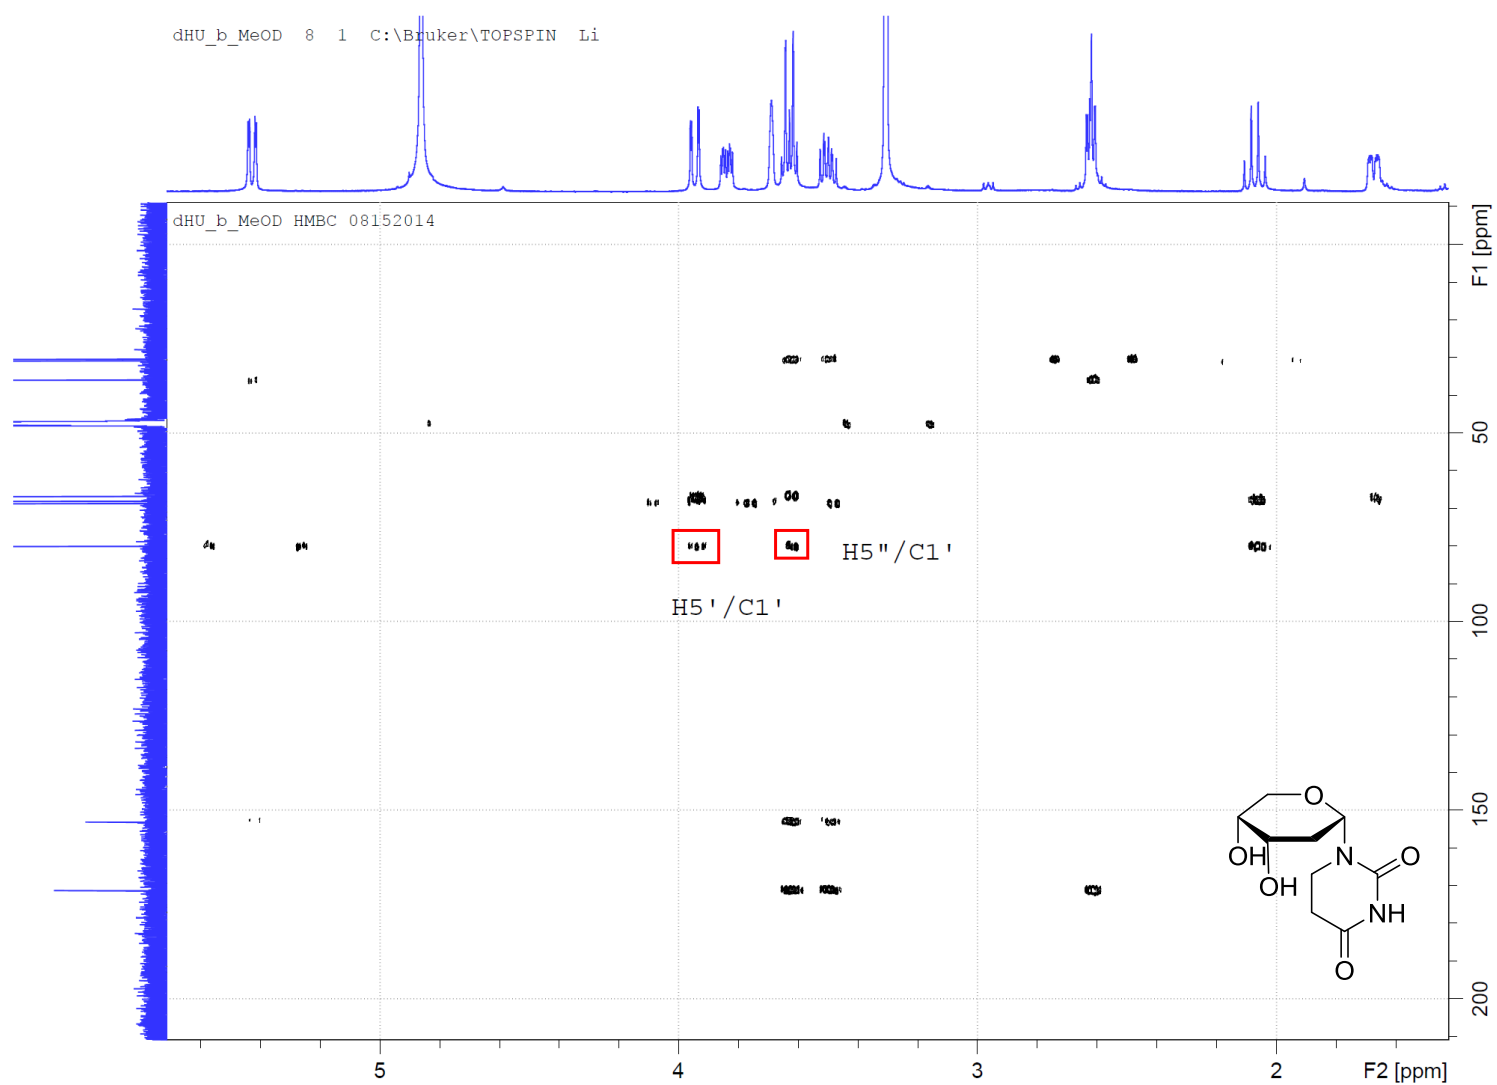

**Figure S19.** HMBC spectrum of compound **2**.

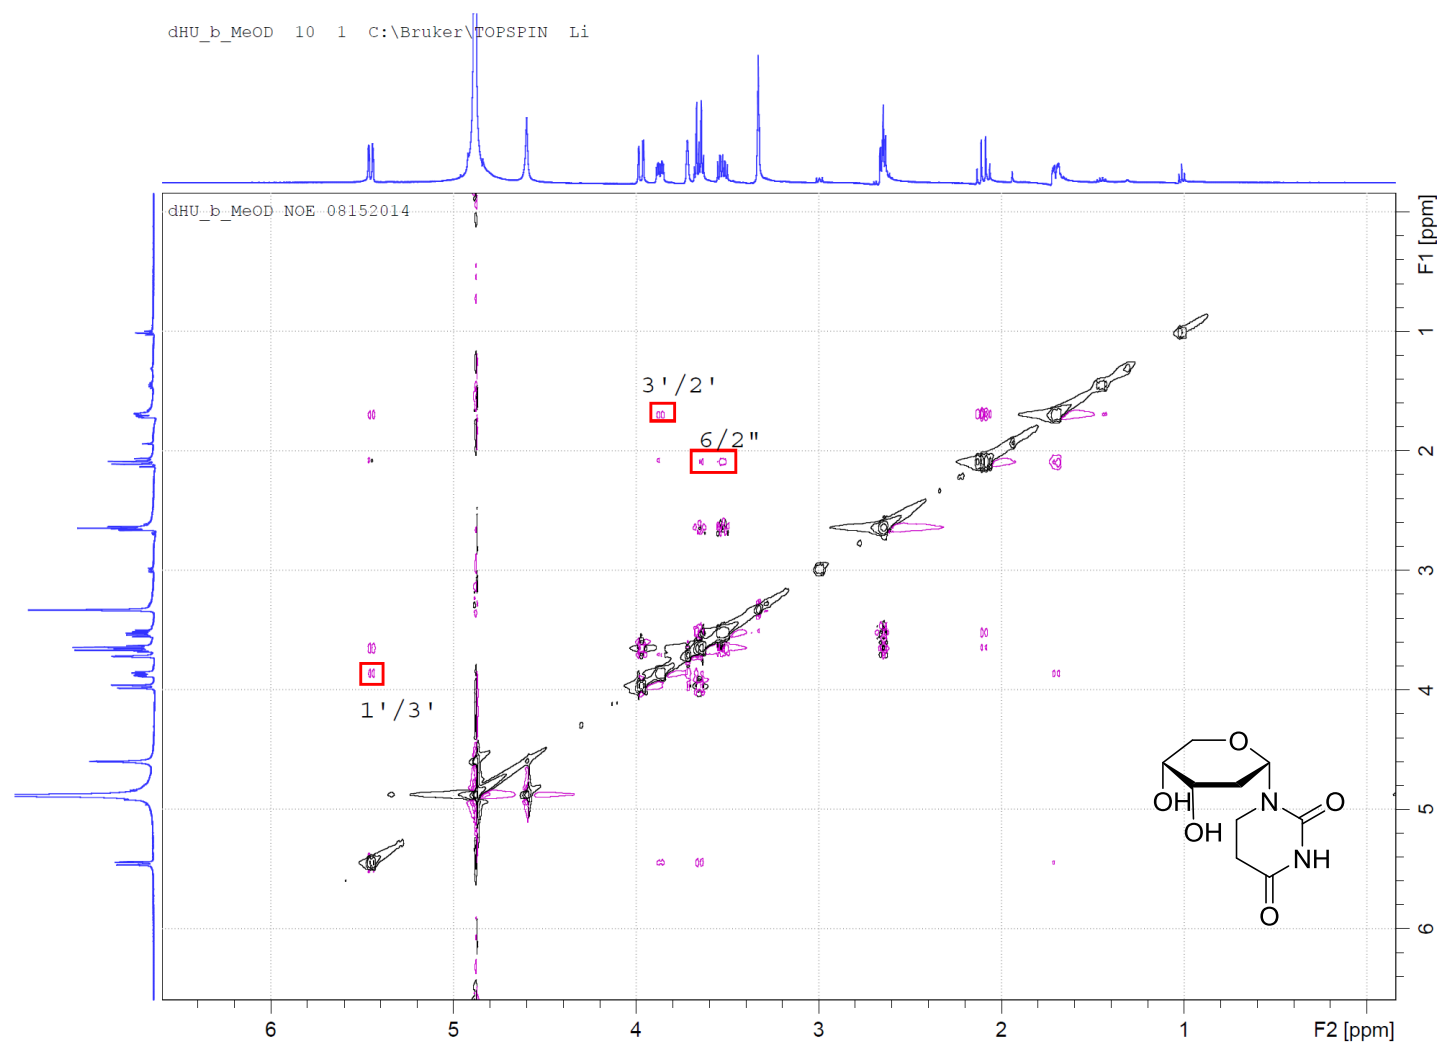

**Figure S20.** NOE spectrum of compound **2**.

dHdU\_MeOD 11132014

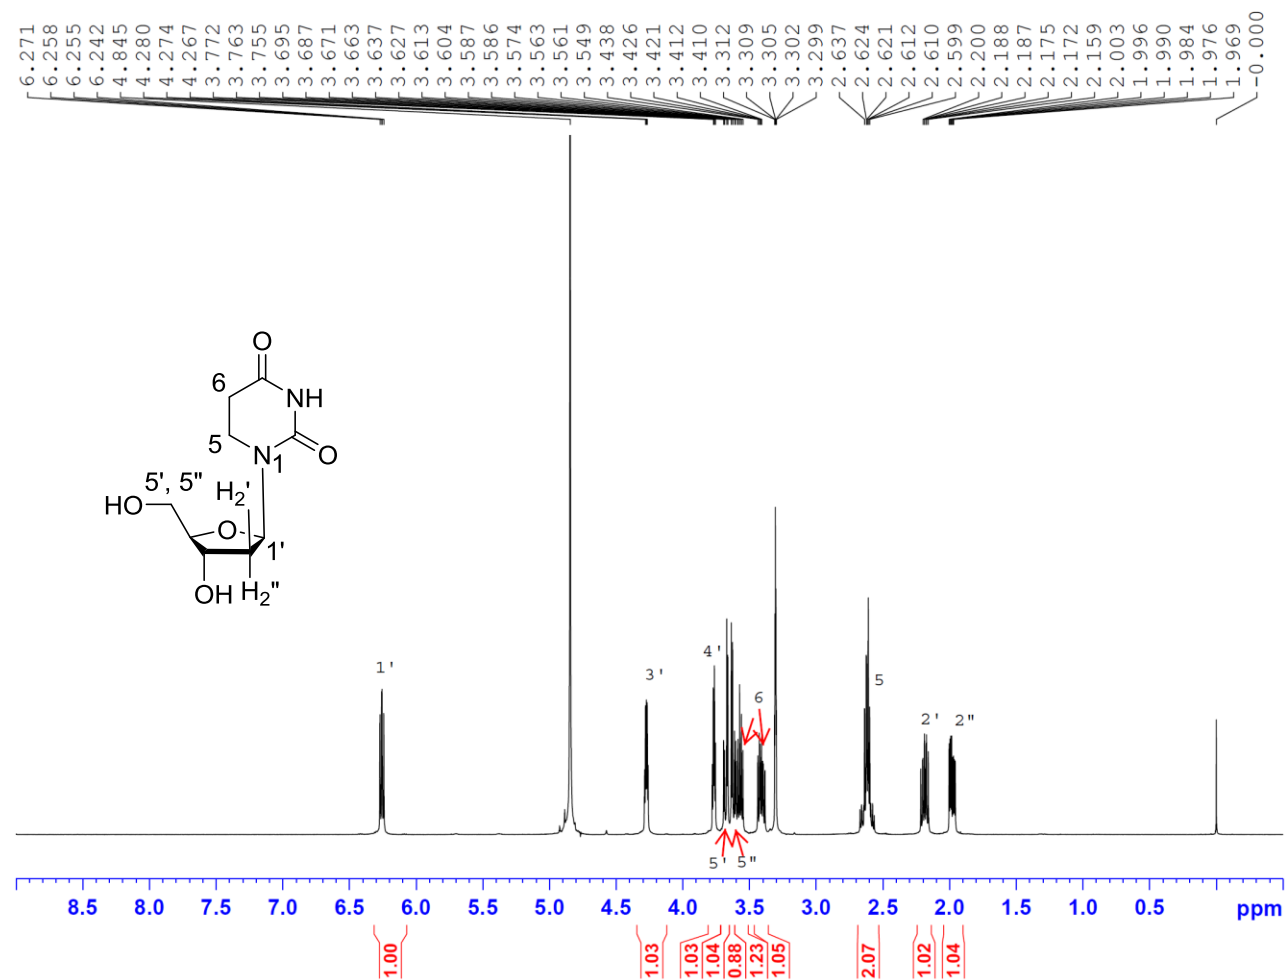

**Figure S21.** <sup>1</sup>H NMR spectrum of **dHdU**.

dHdU\_MeOD C 11132014

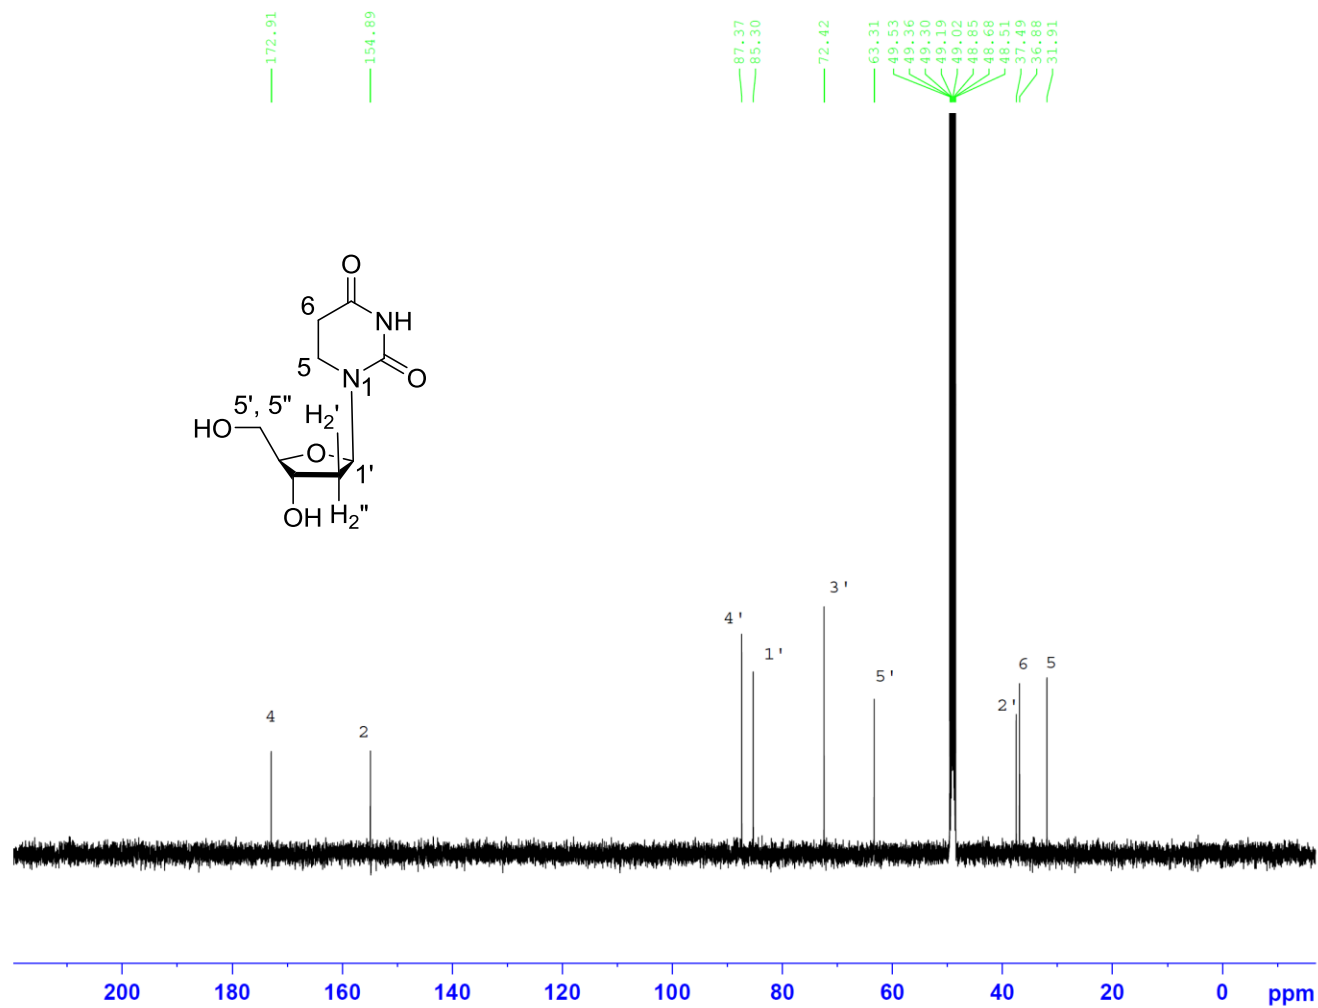

**Figure S22.** <sup>13</sup>C NMR spectrum of **dHdU**.

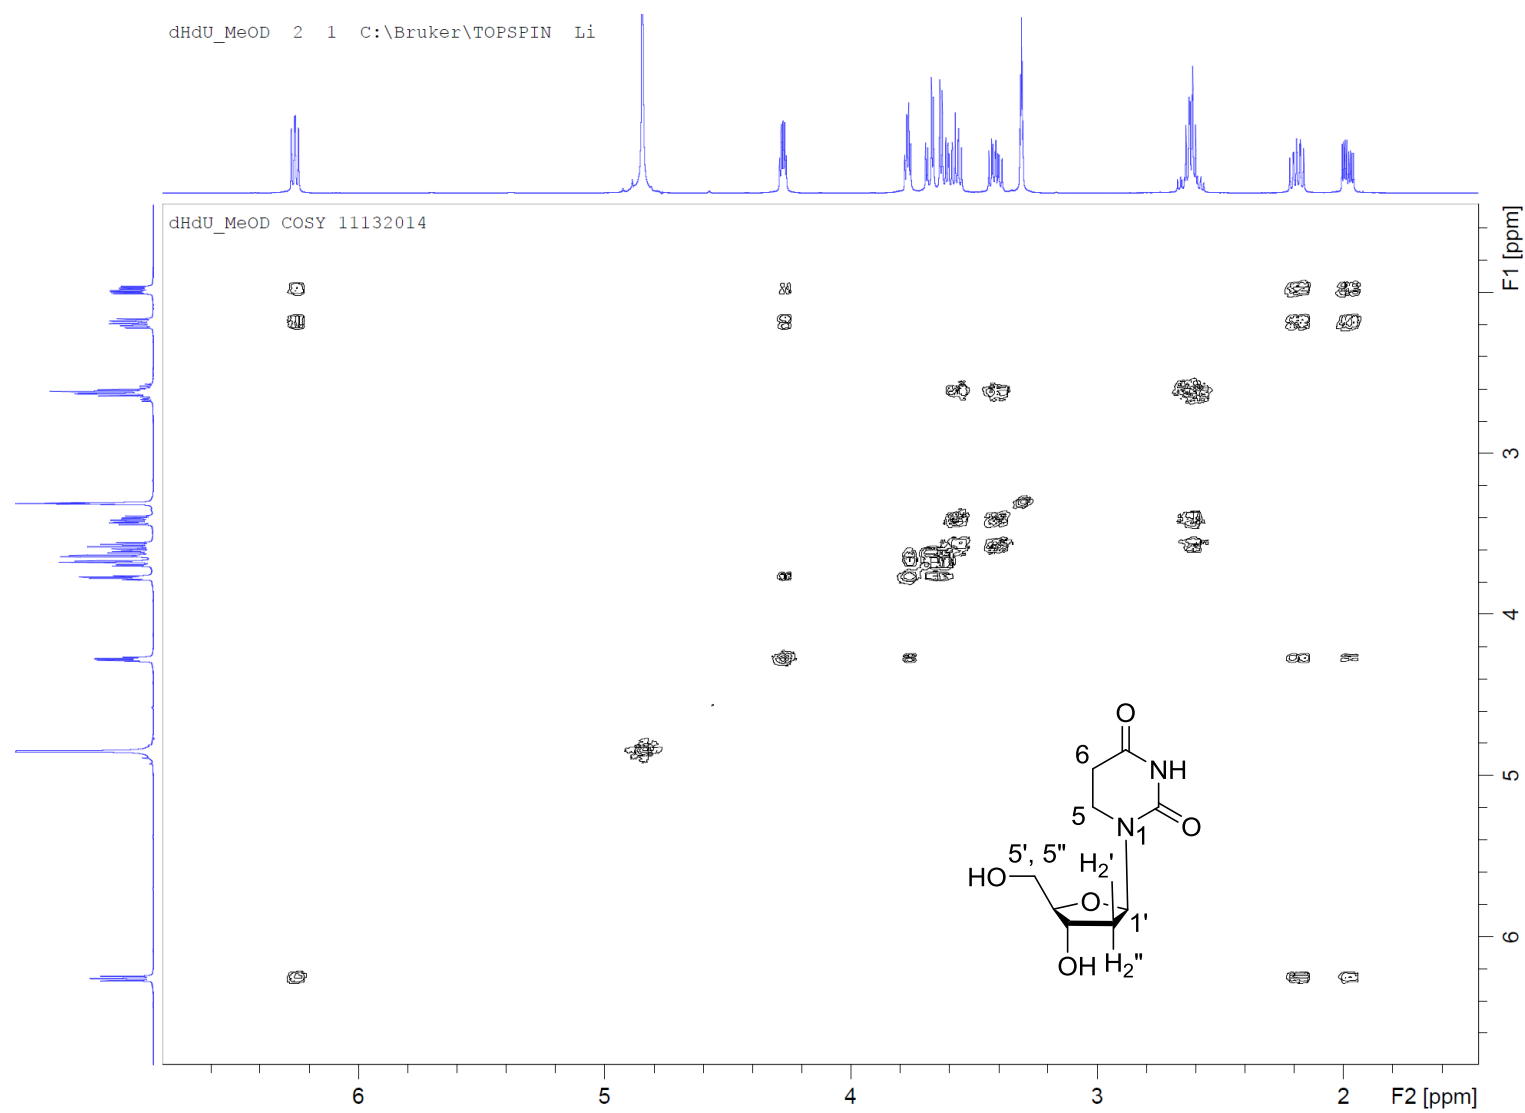

**Figure S23.** COSY spectrum of dHdU.

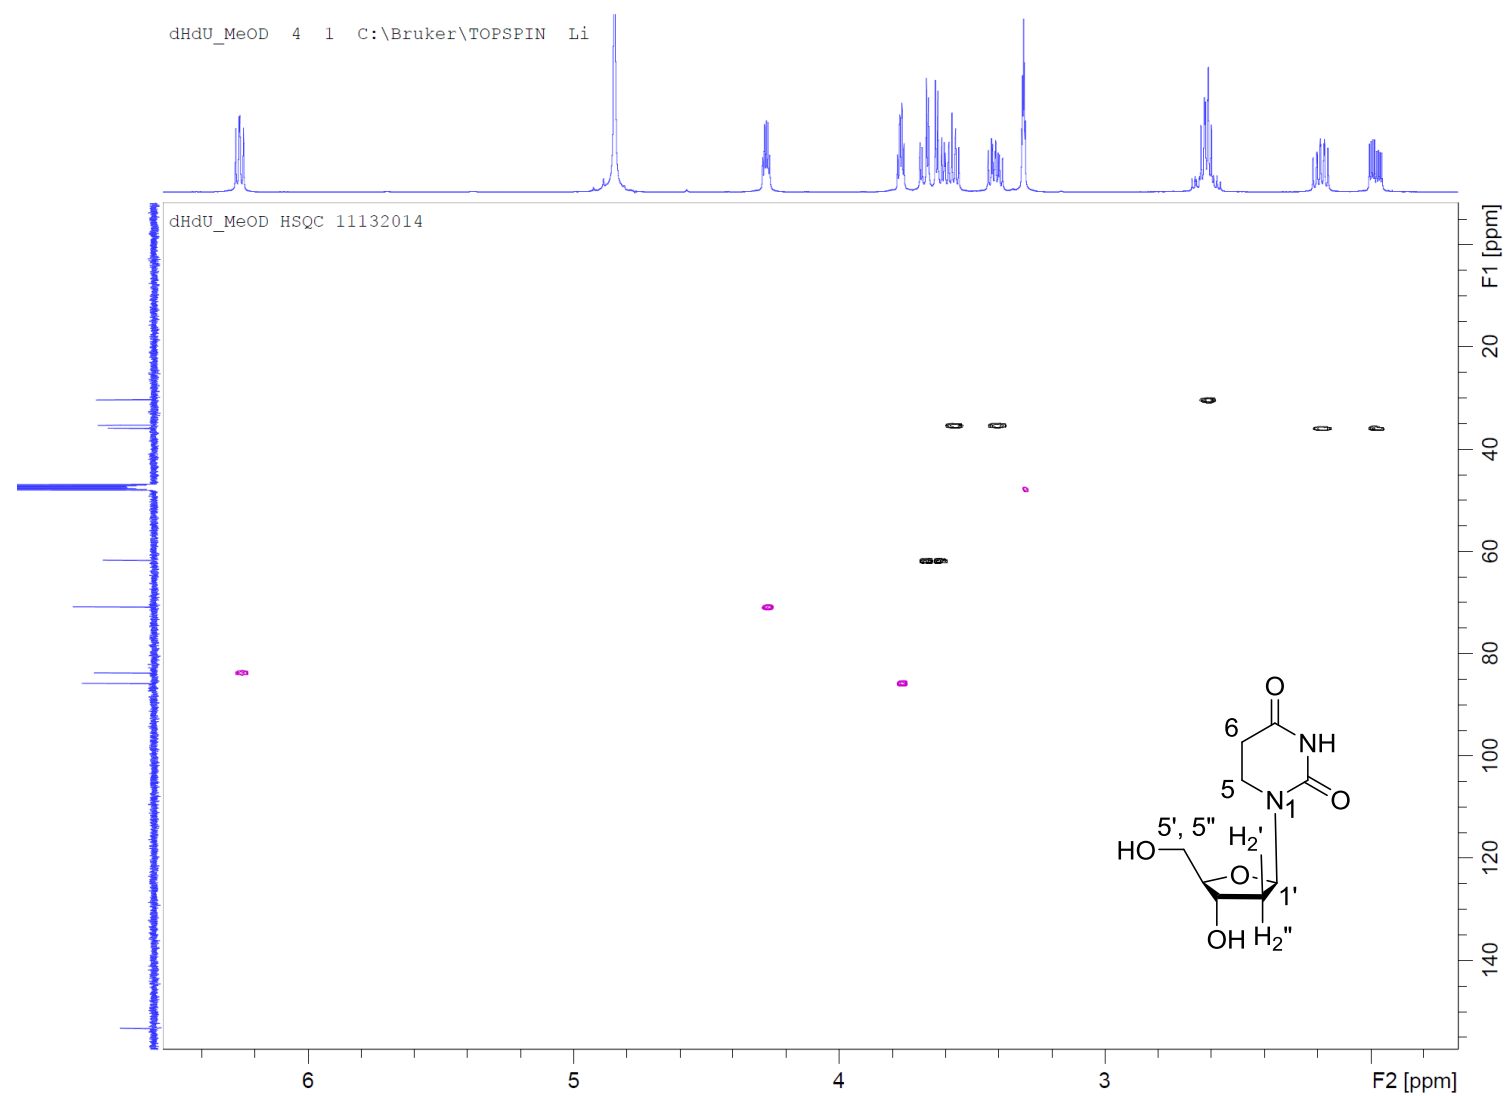

**Figure S24.** HSQC spectrum of **dHdU**.

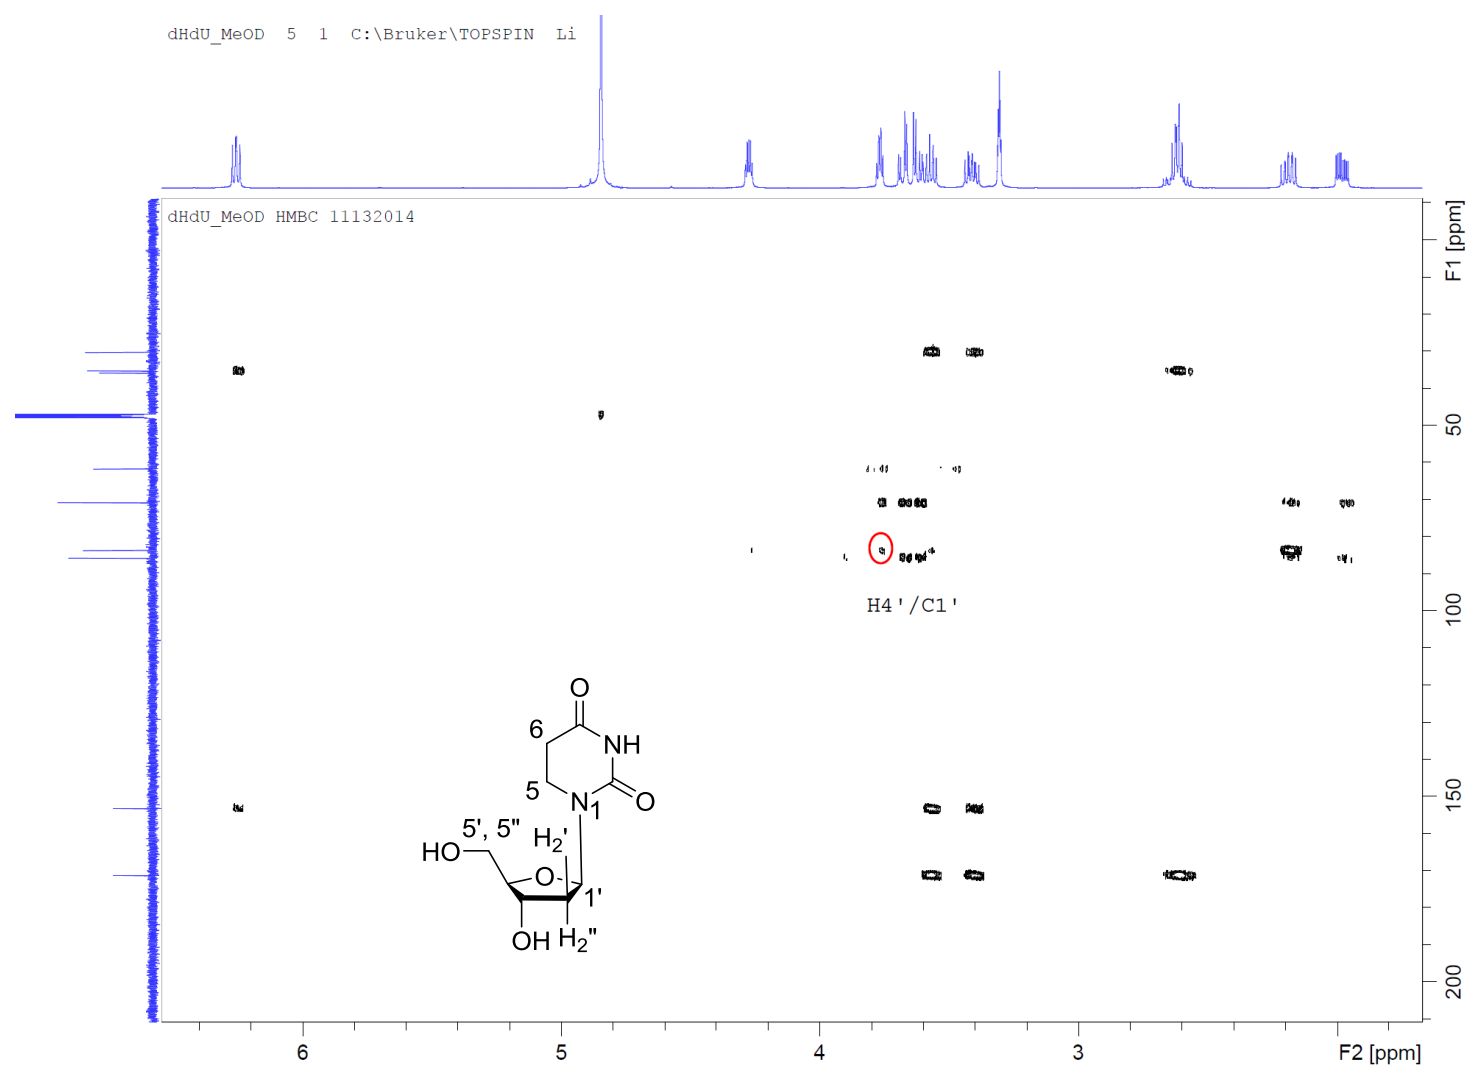

**Figure S25.** HMBC spectrum of **dHdU**.

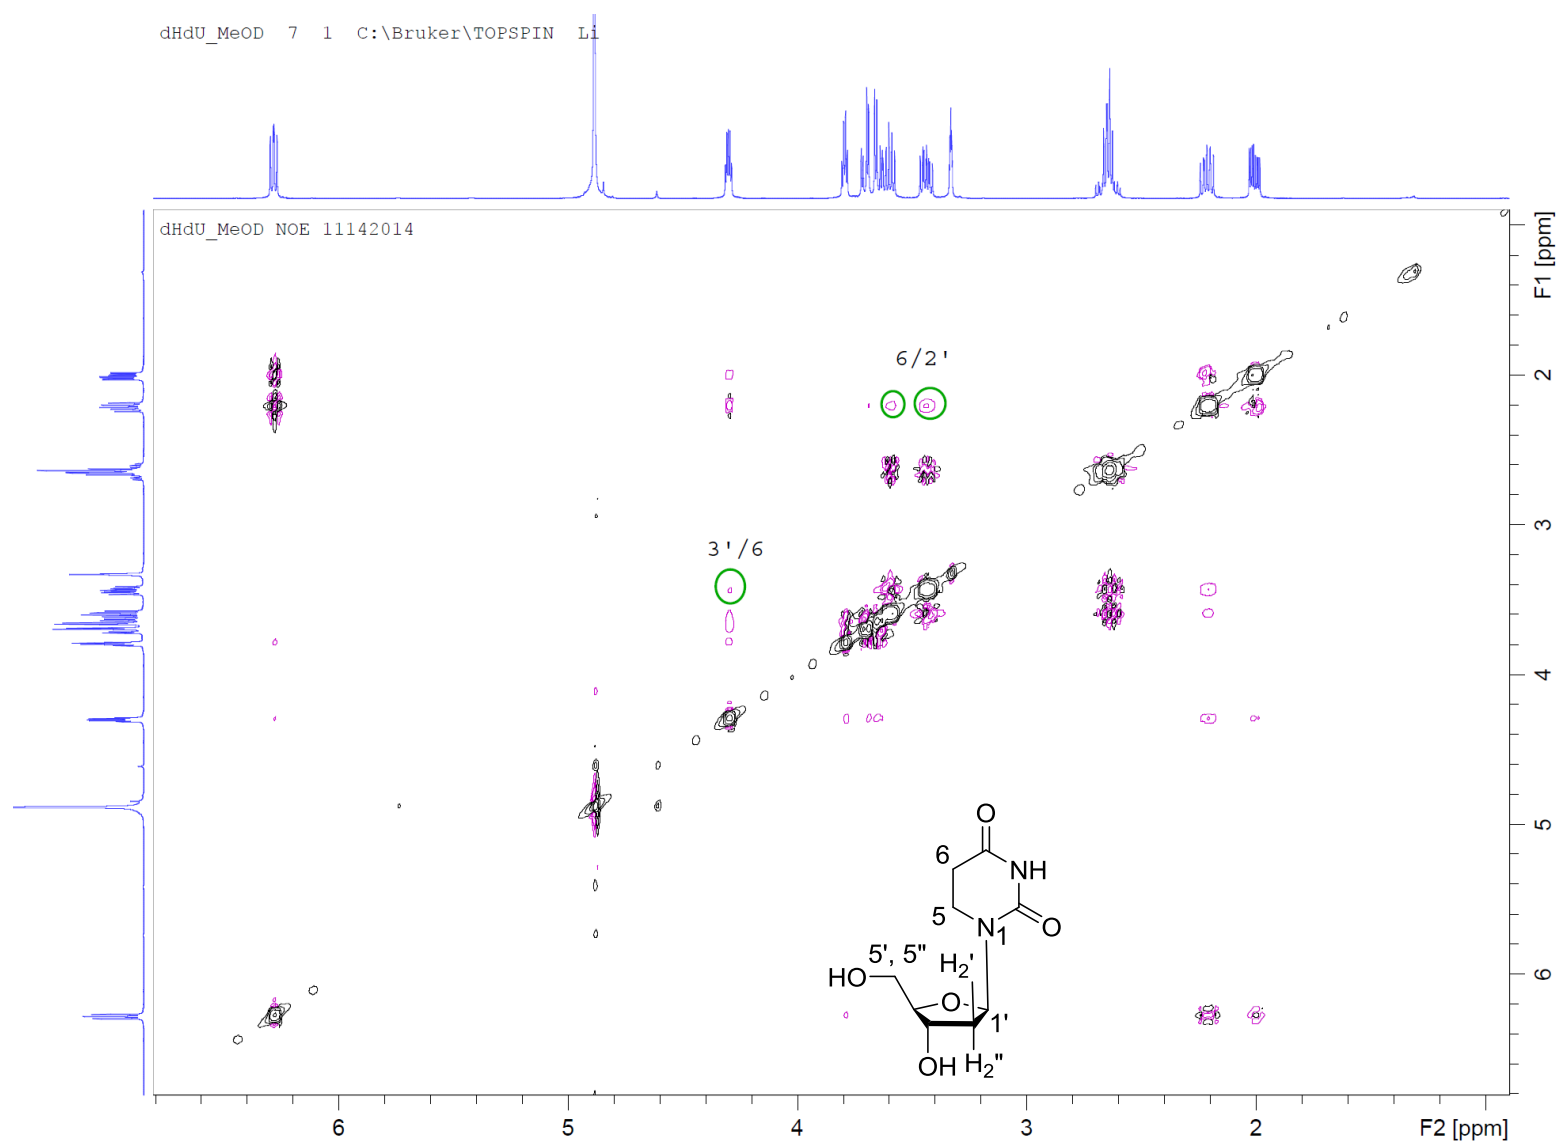

**Figure S26.** NOESY spectrum of **dHdU**.



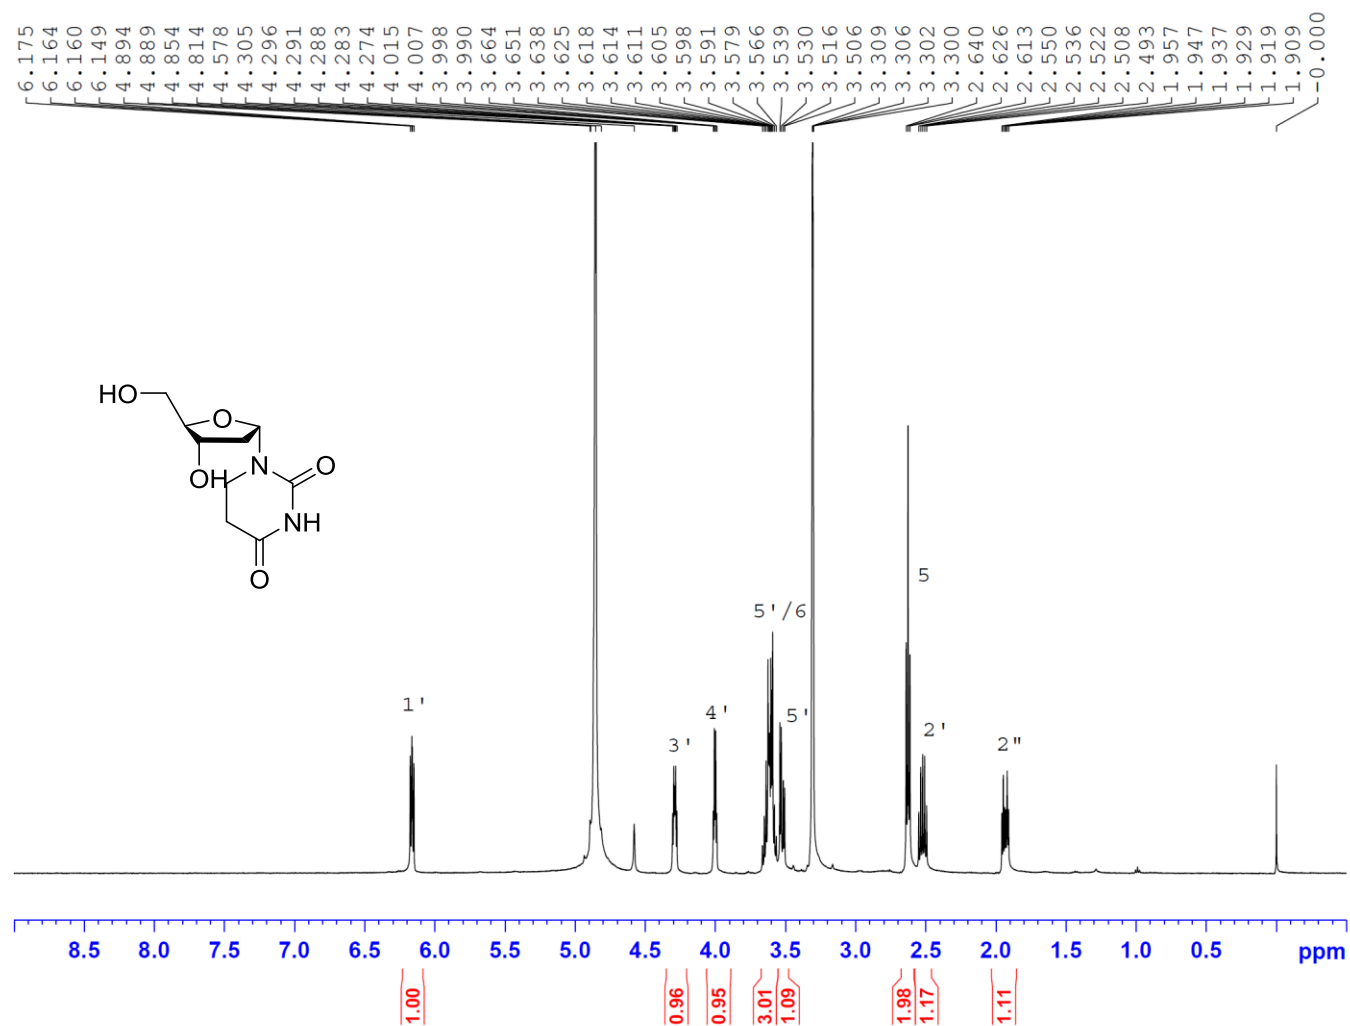

**Figure S27.** <sup>1</sup>H NMR spectrum of compound 3.

dHU\_d\_MeOD C 08212014

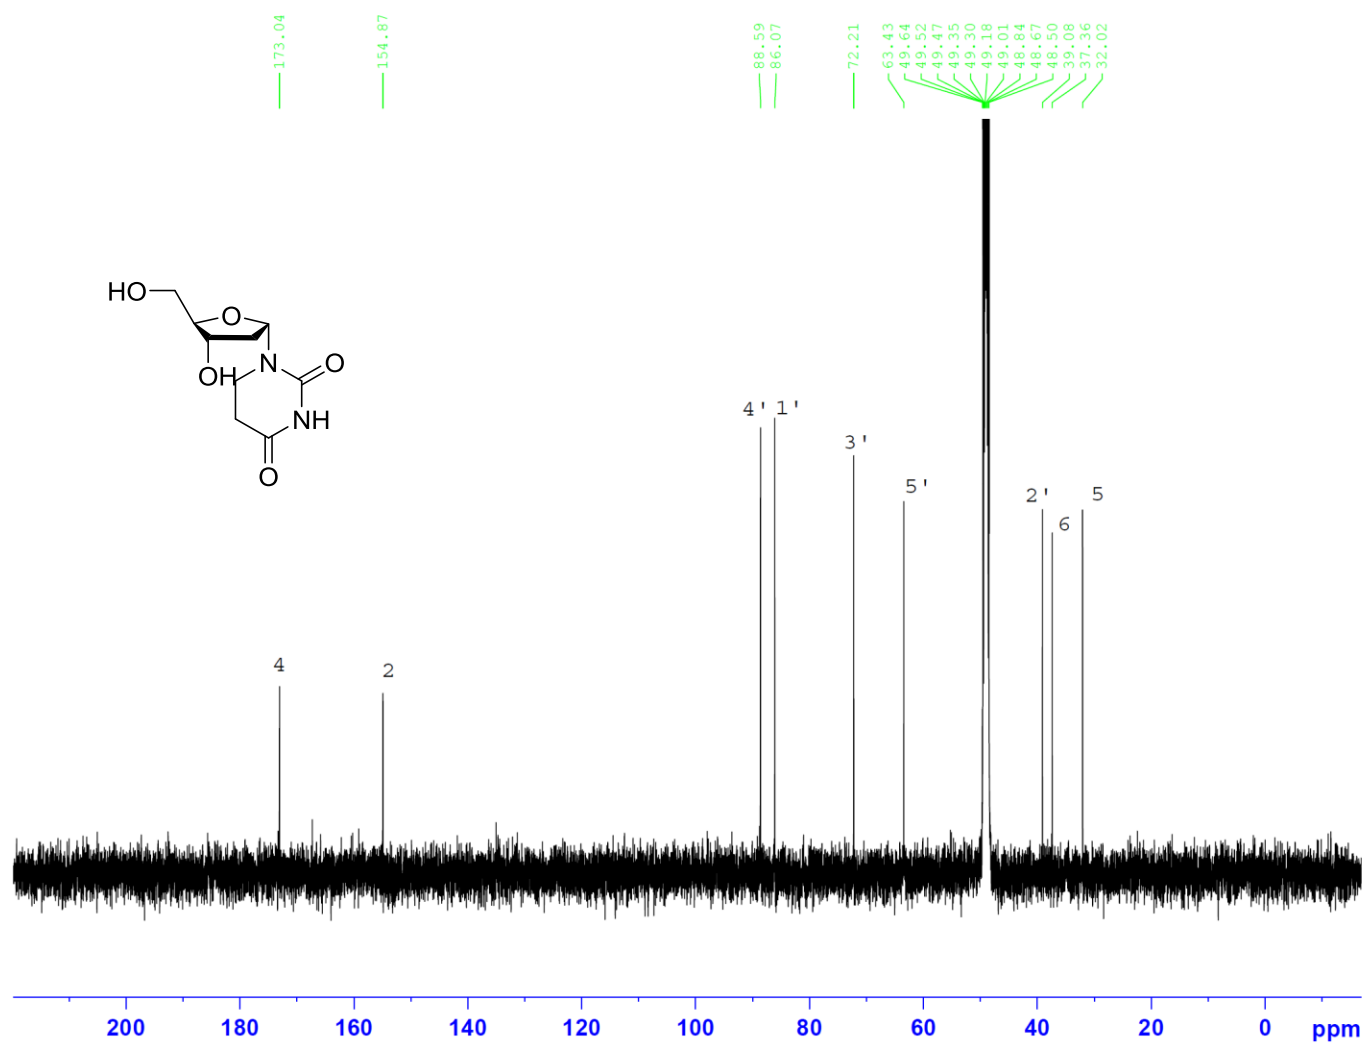

Figure S28.  $^{13}\text{C}$  NMR spectrum of compound 3.

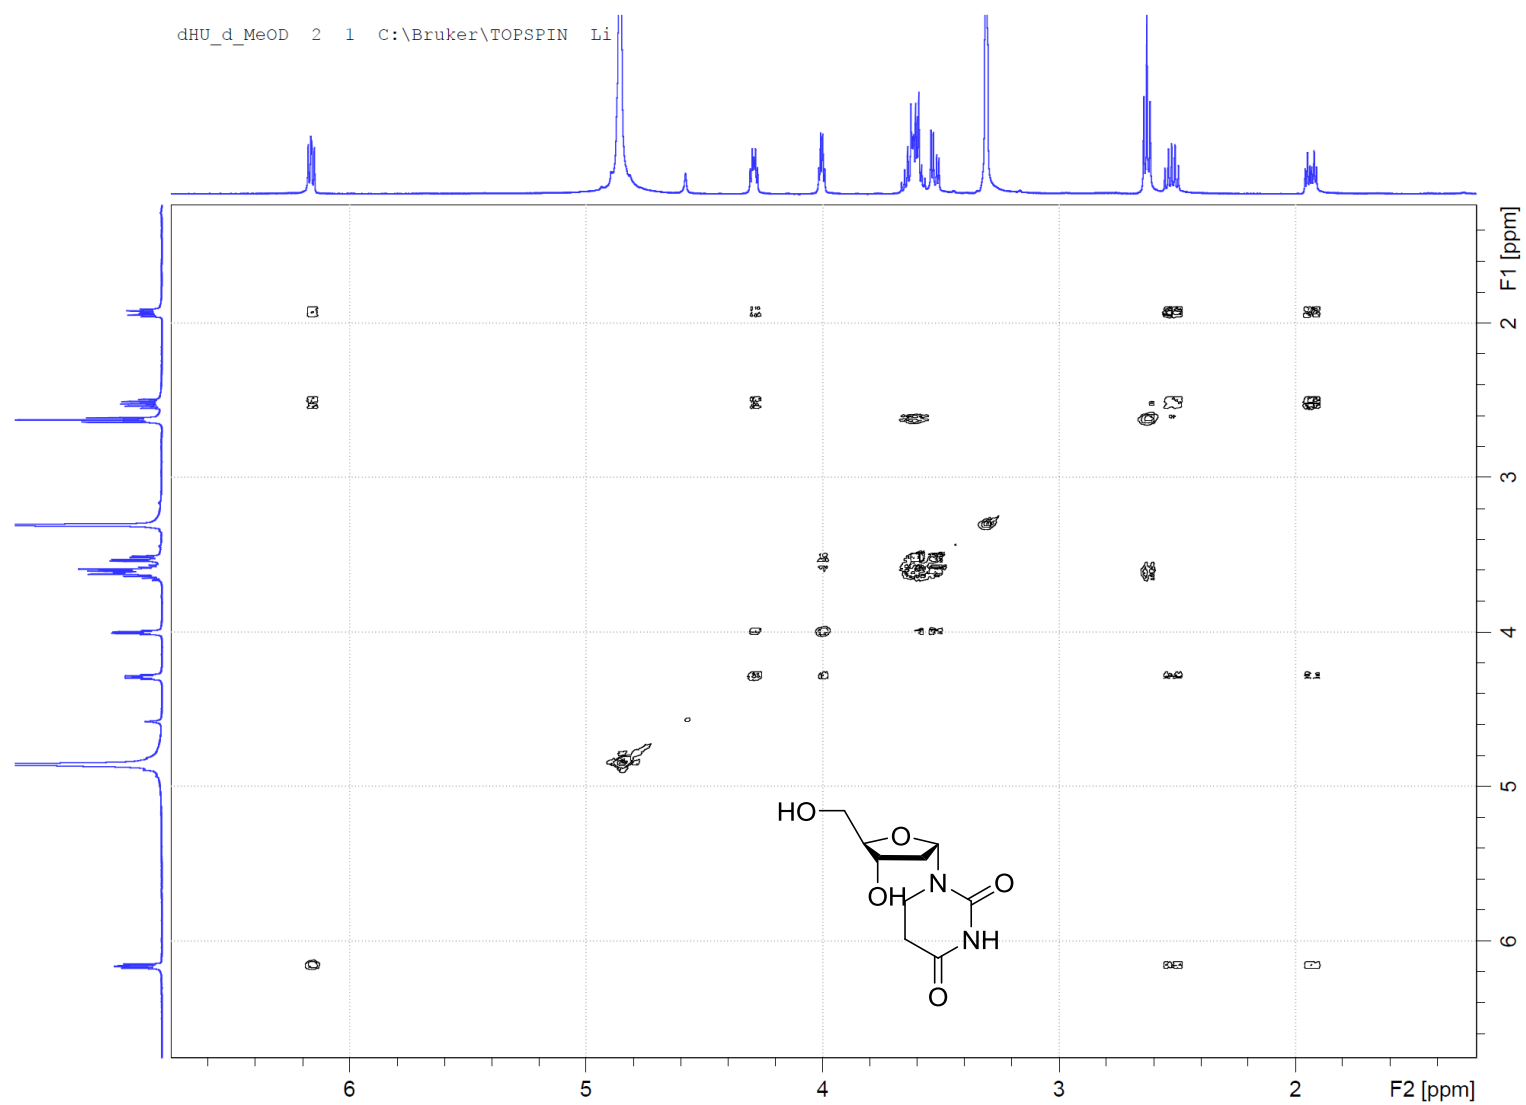

**Figure S29.** COSY spectrum of compound **3**.

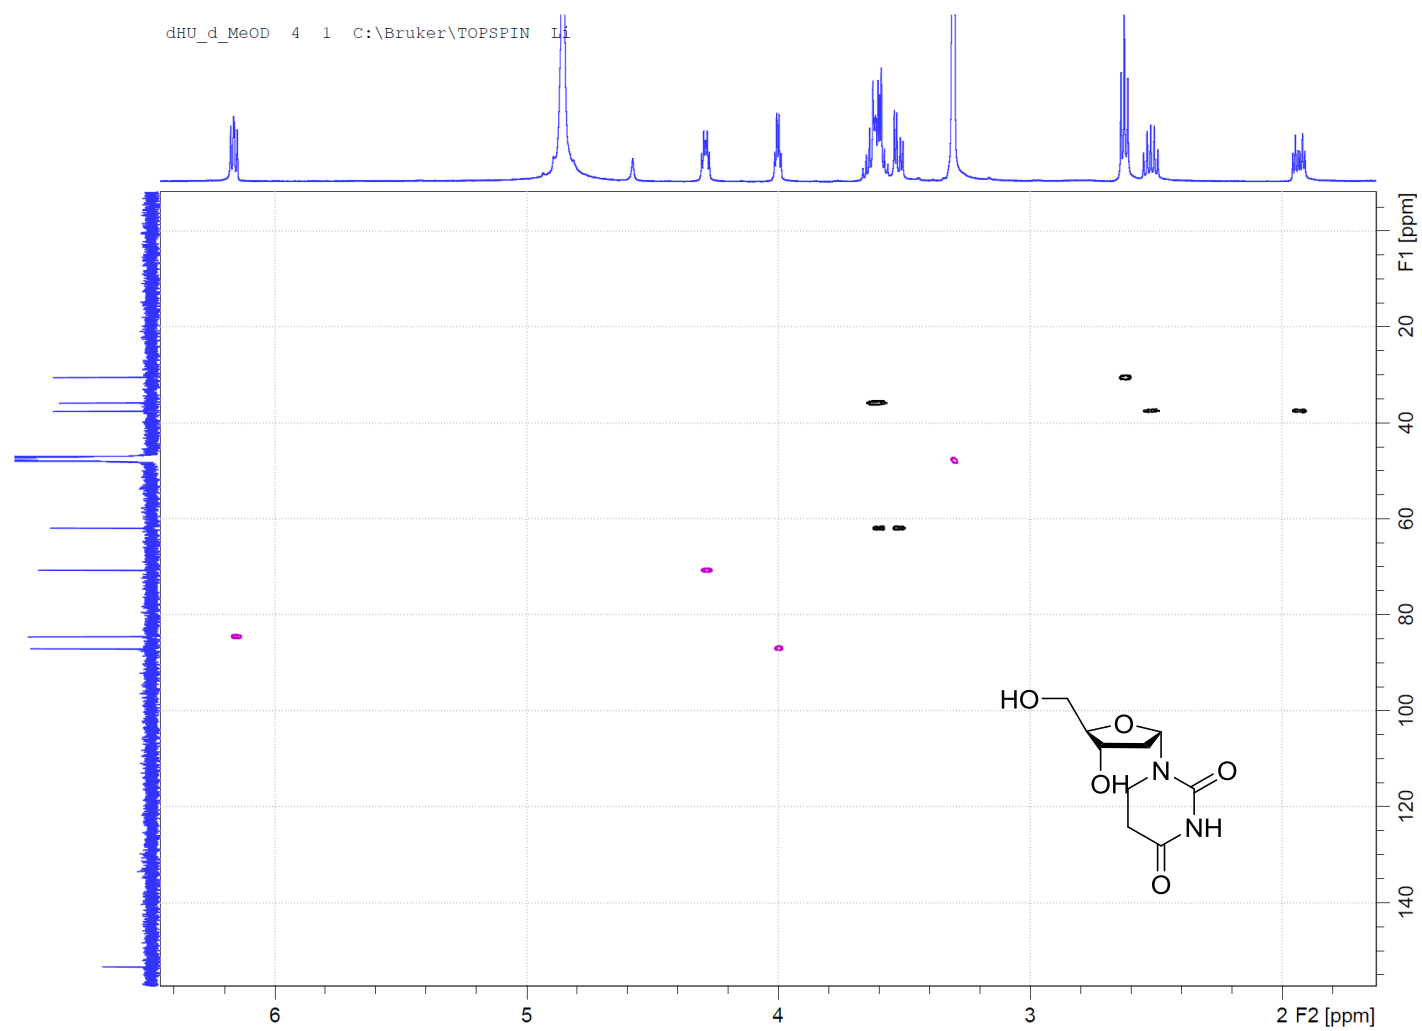

**Figure S30.** HSQC spectrum of compound **3**.

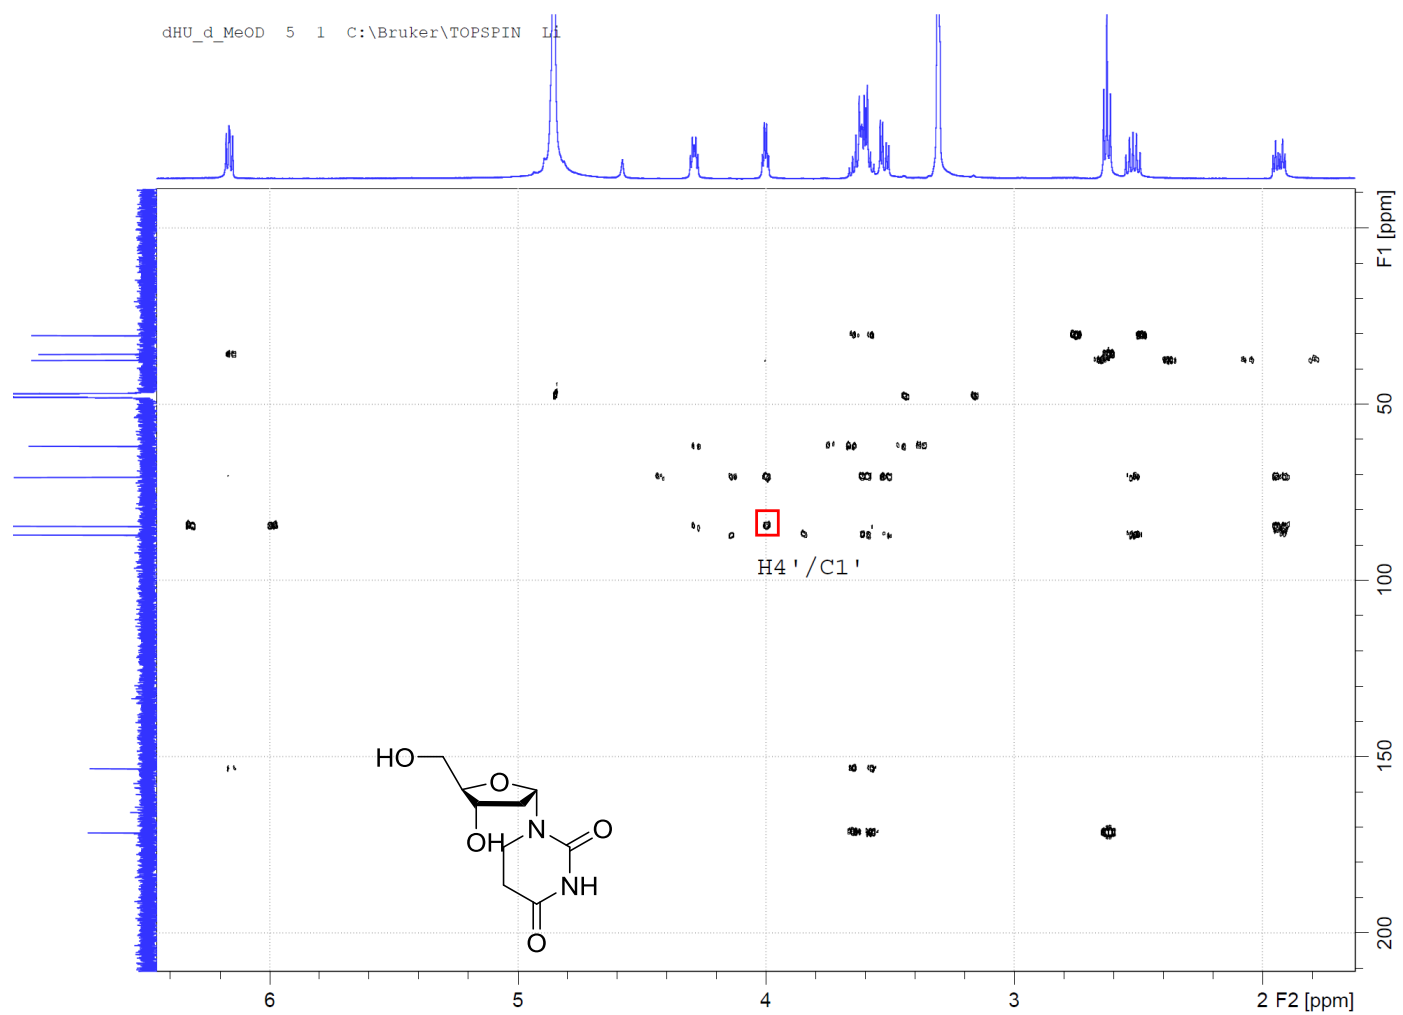

**Figure S31.** HMBC spectrum of compound **3**.

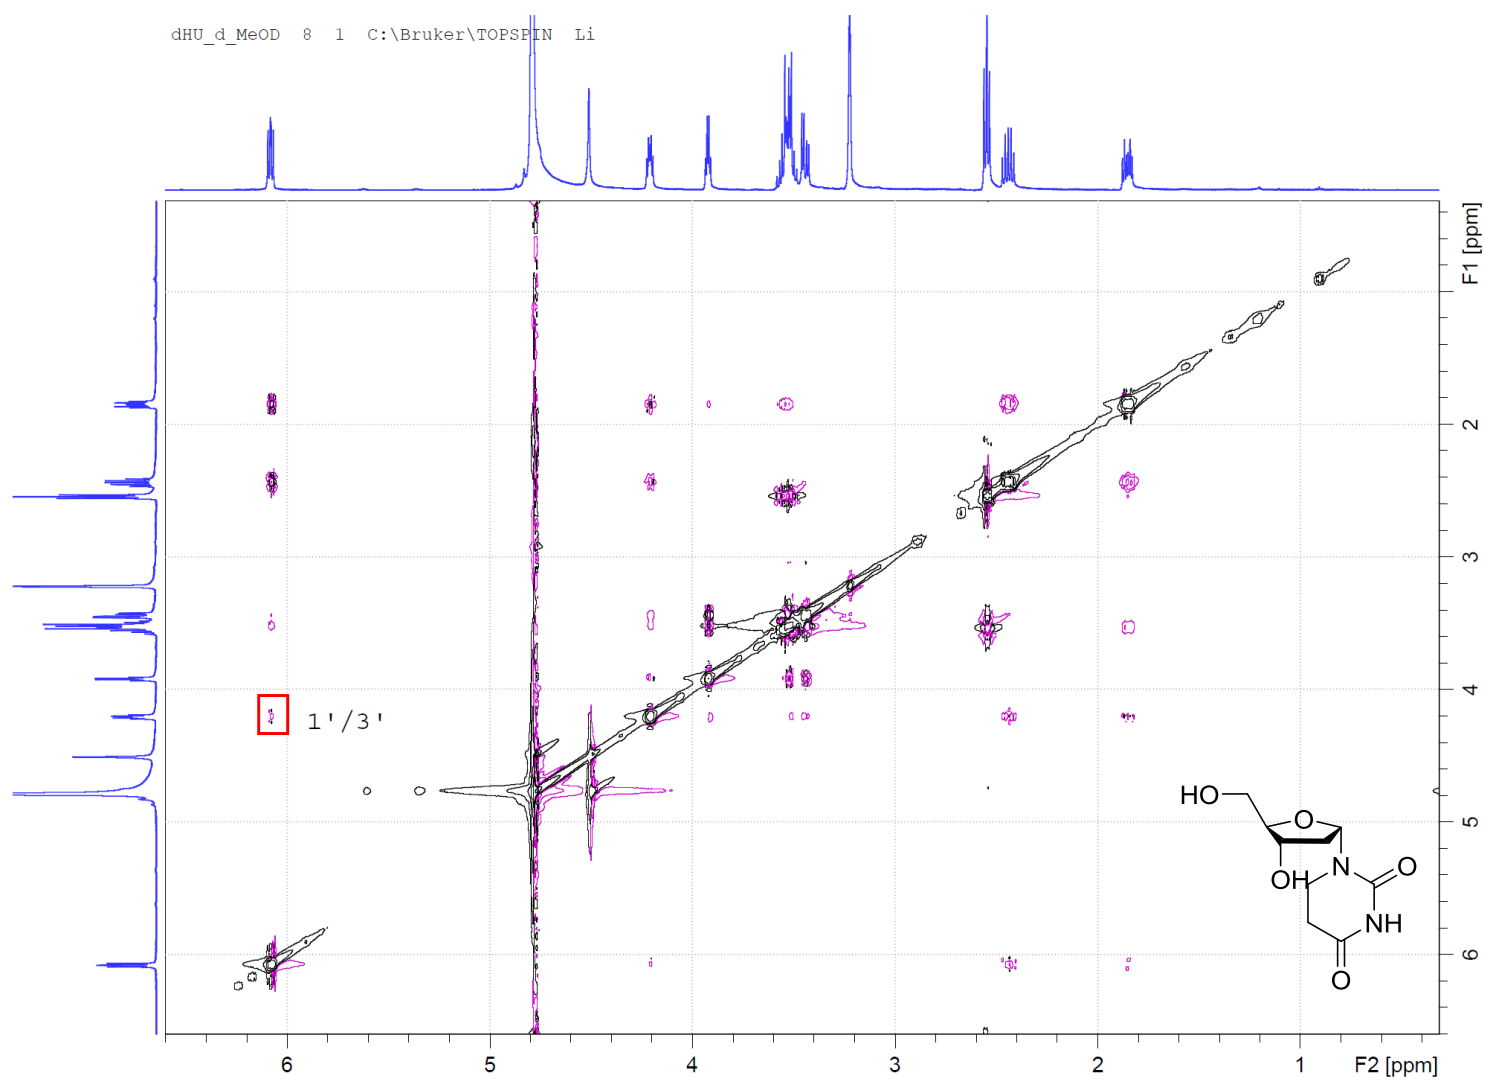

**Figure S32.** NOESY spectrum of compound **3**.

dHU\_e\_MeOD 08162014

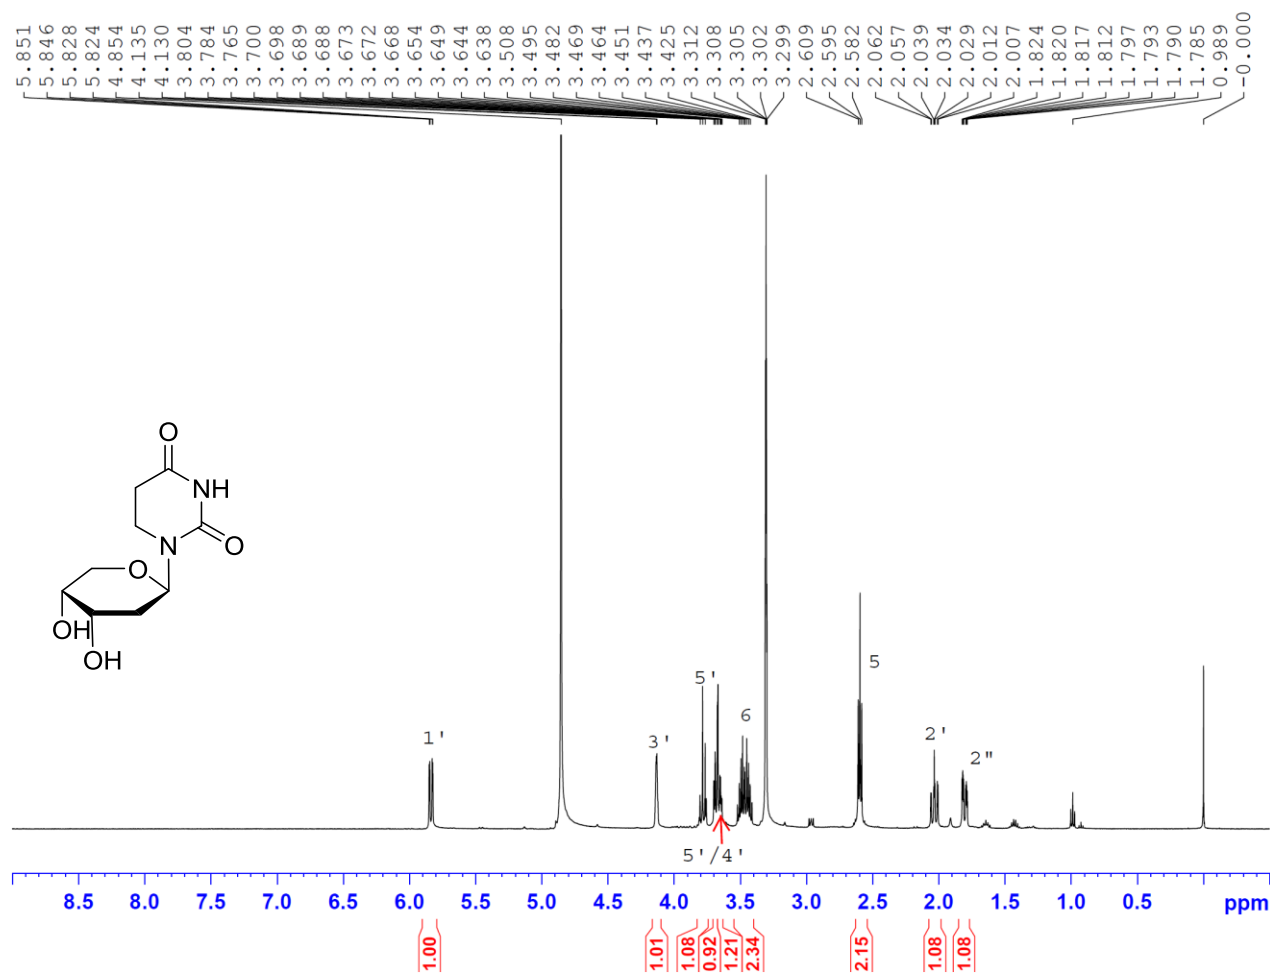

Figure S33. <sup>1</sup>H NMR spectrum of compound 4.

dHU\_e\_MeOD C 08162014

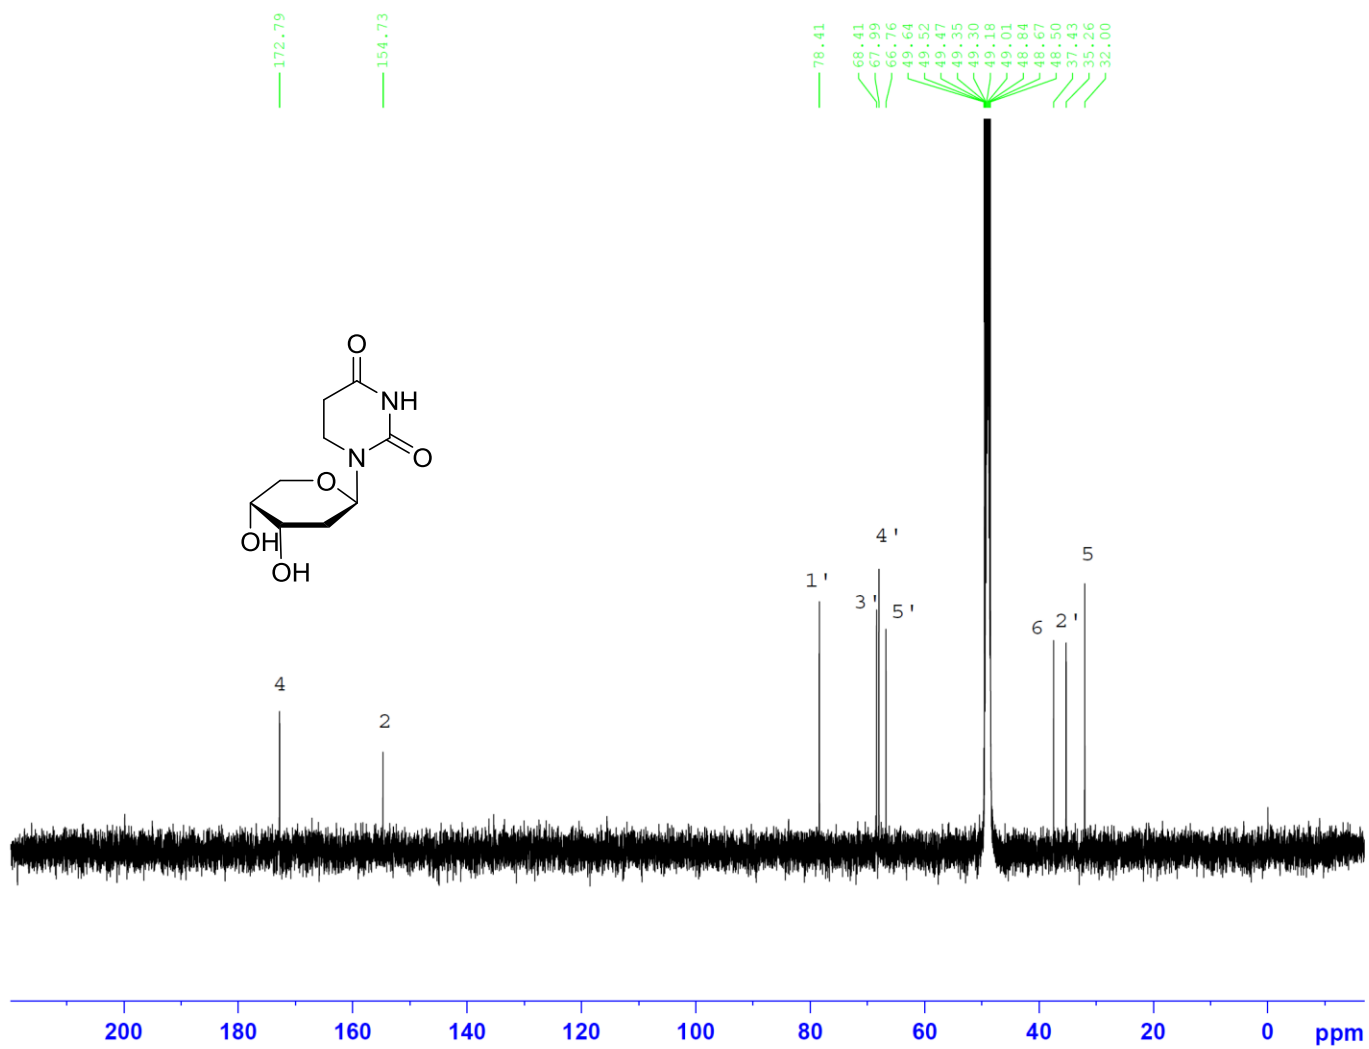

**Figure S34.** <sup>13</sup>C NMR spectrum of compound 4.



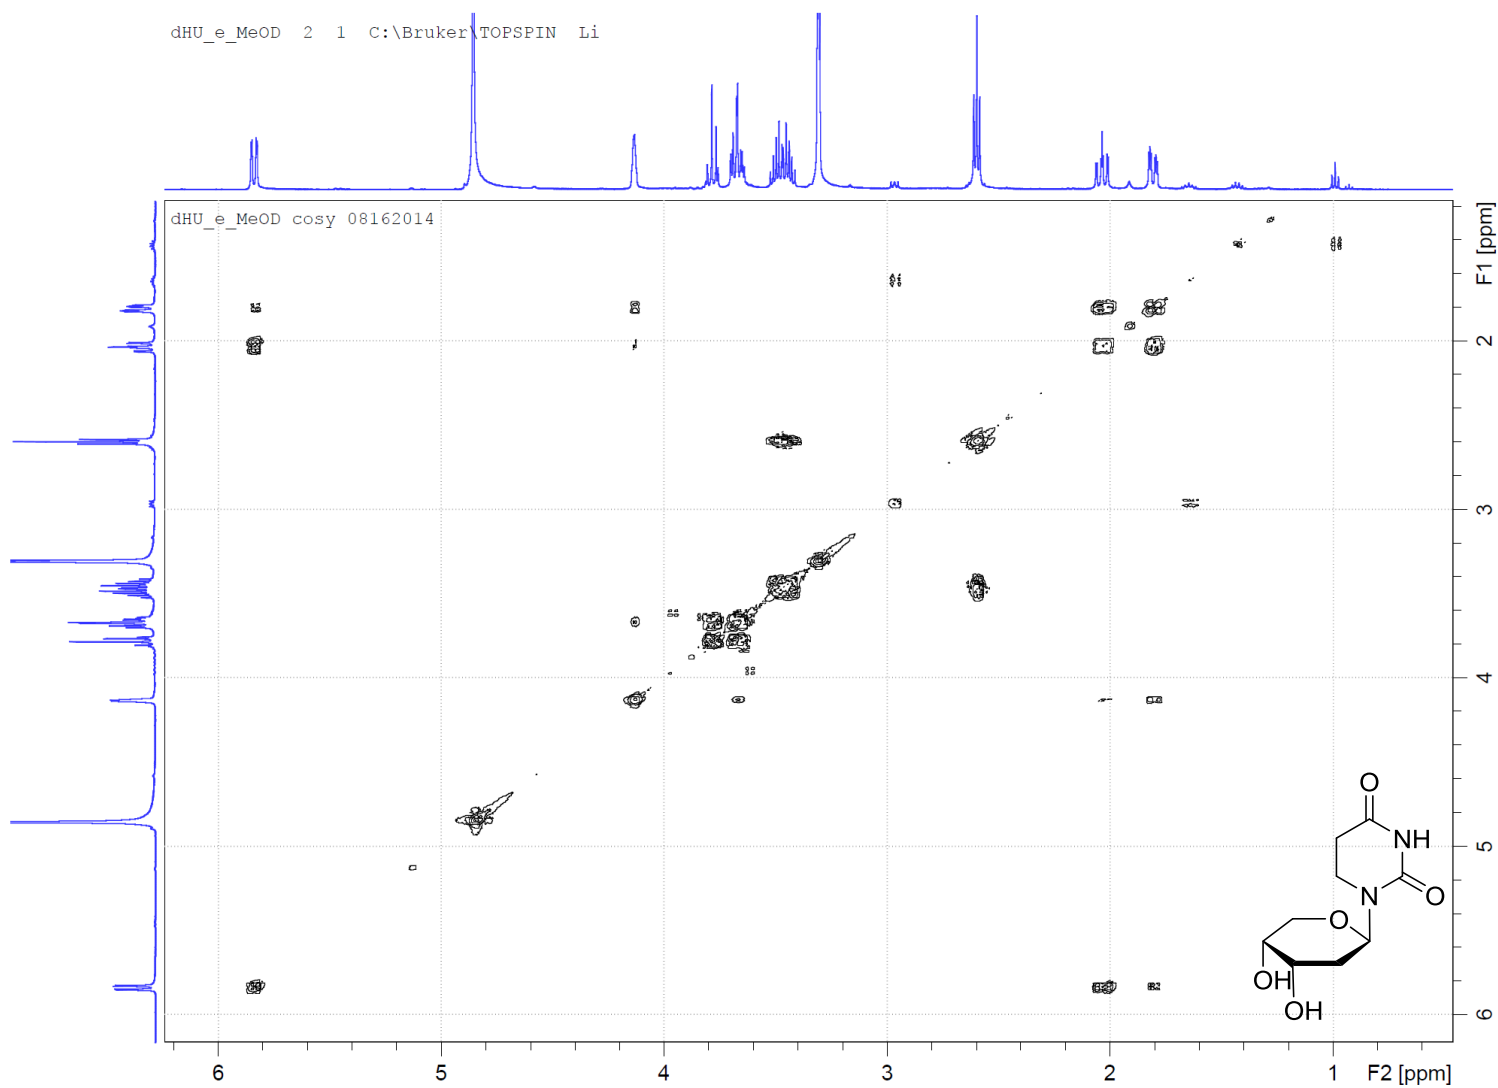

**Figure S35.** COSY spectrum of compound **4**.

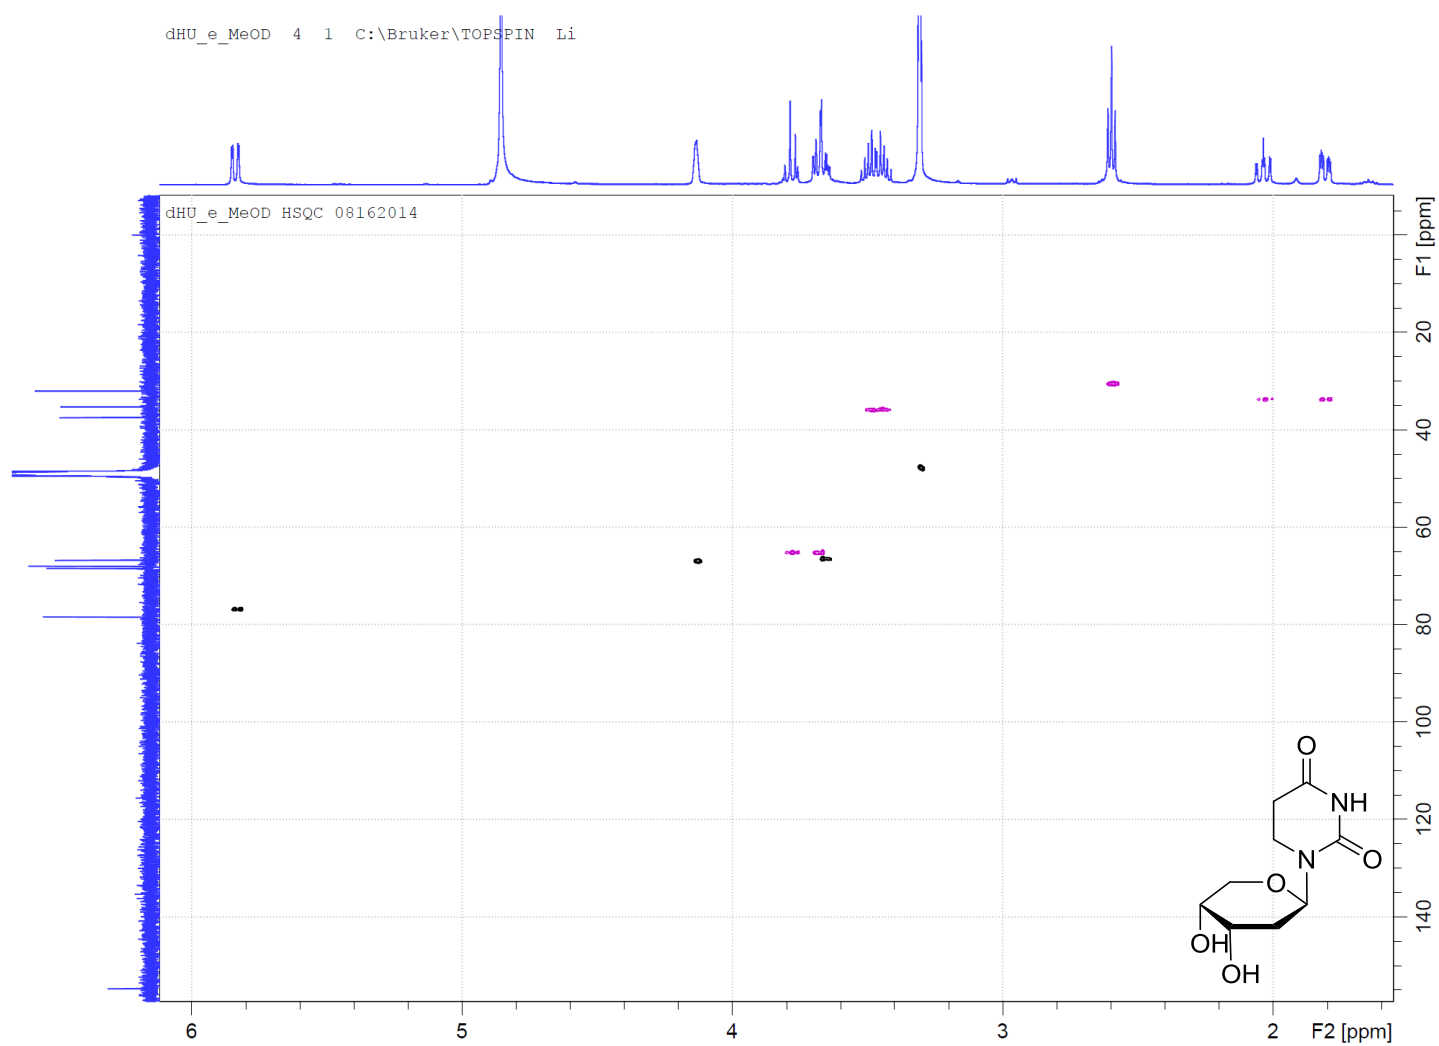

**Figure S36.** HSQC spectrum of compound **4**.

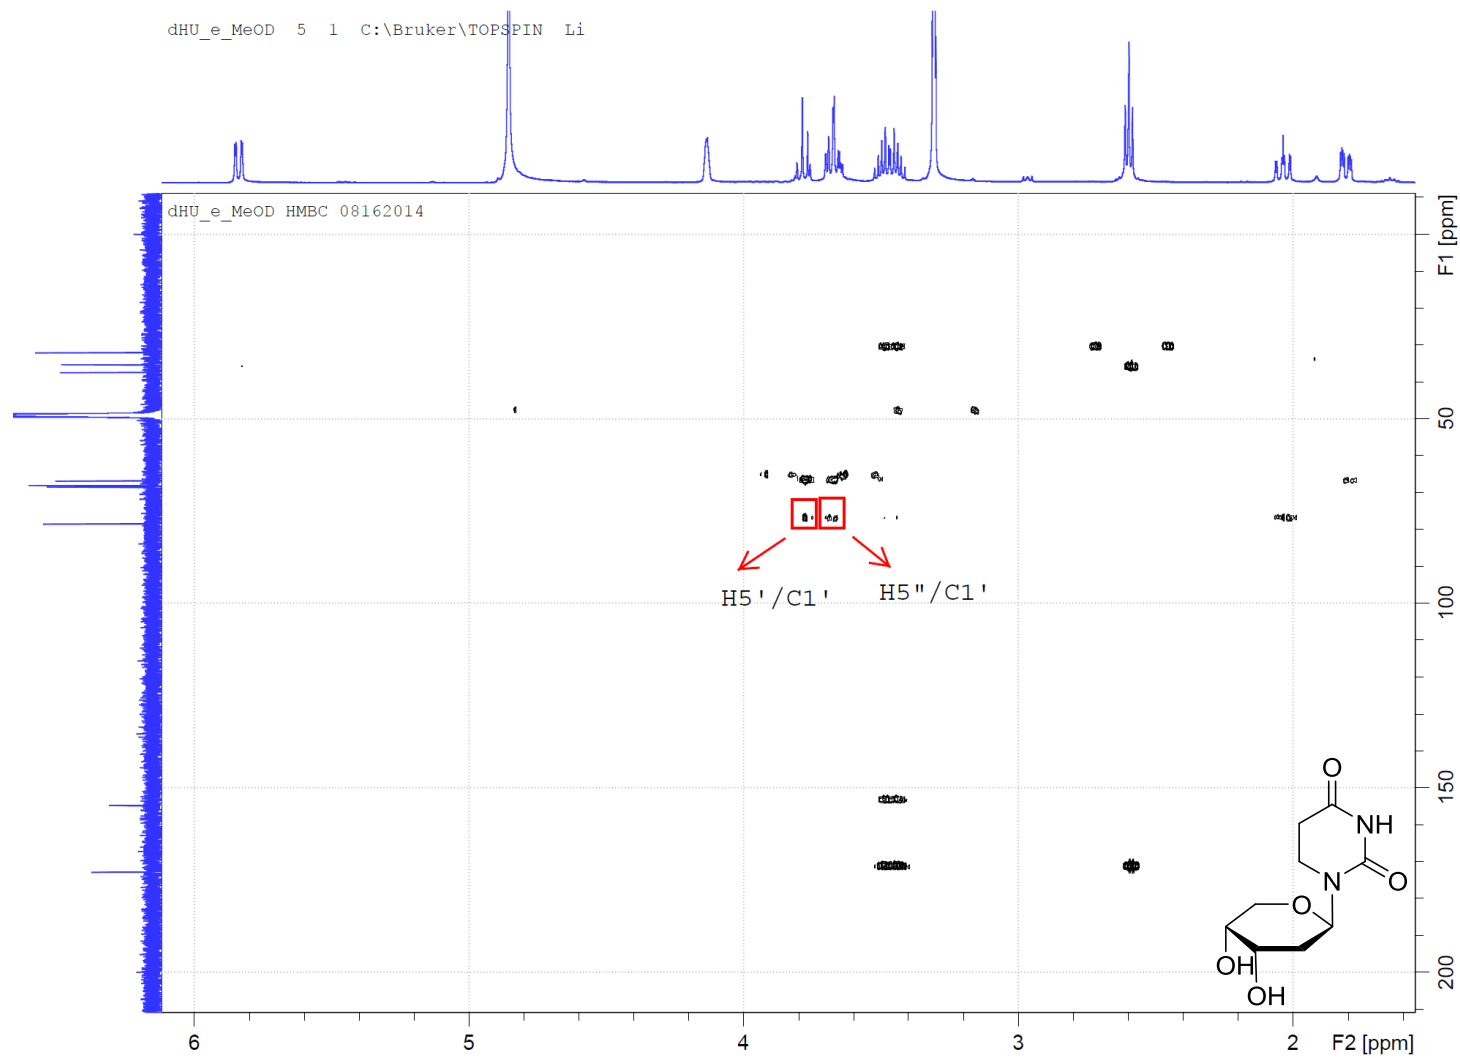

**Figure S37.** HMBC spectrum of compound **4**.

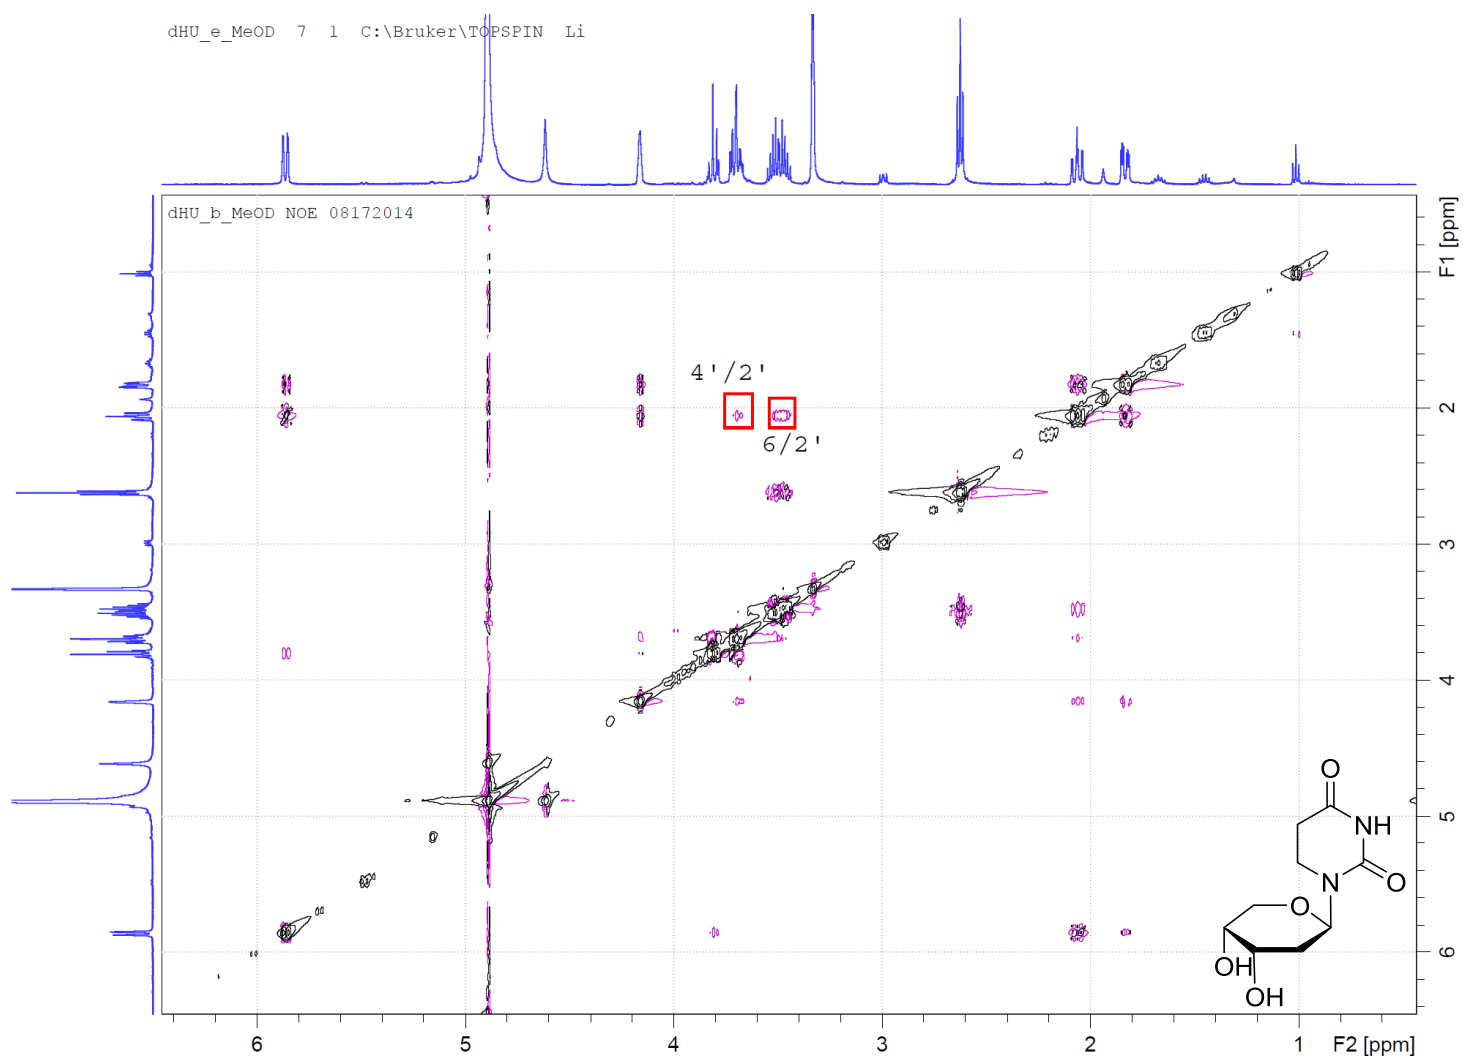

**Figure S38.** NOESY spectrum of compound **4**.

iso64 MeOD 04232014

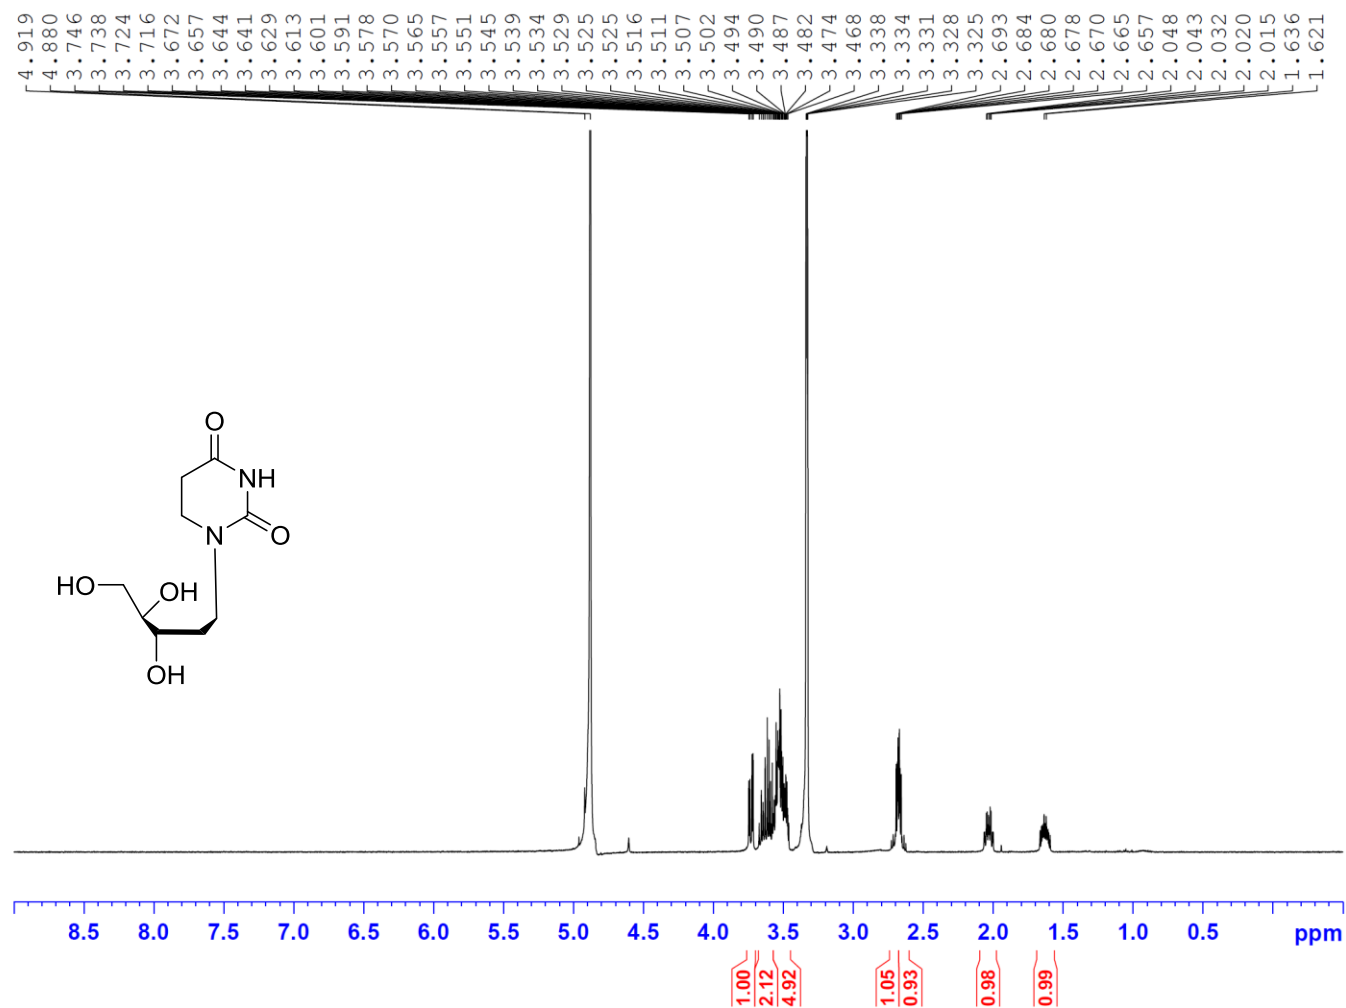

**Figure S39.** <sup>1</sup>H NMR spectrum of compound **5** in Methanol-*d*<sub>4</sub>.

iso64 MeOD C 04302014

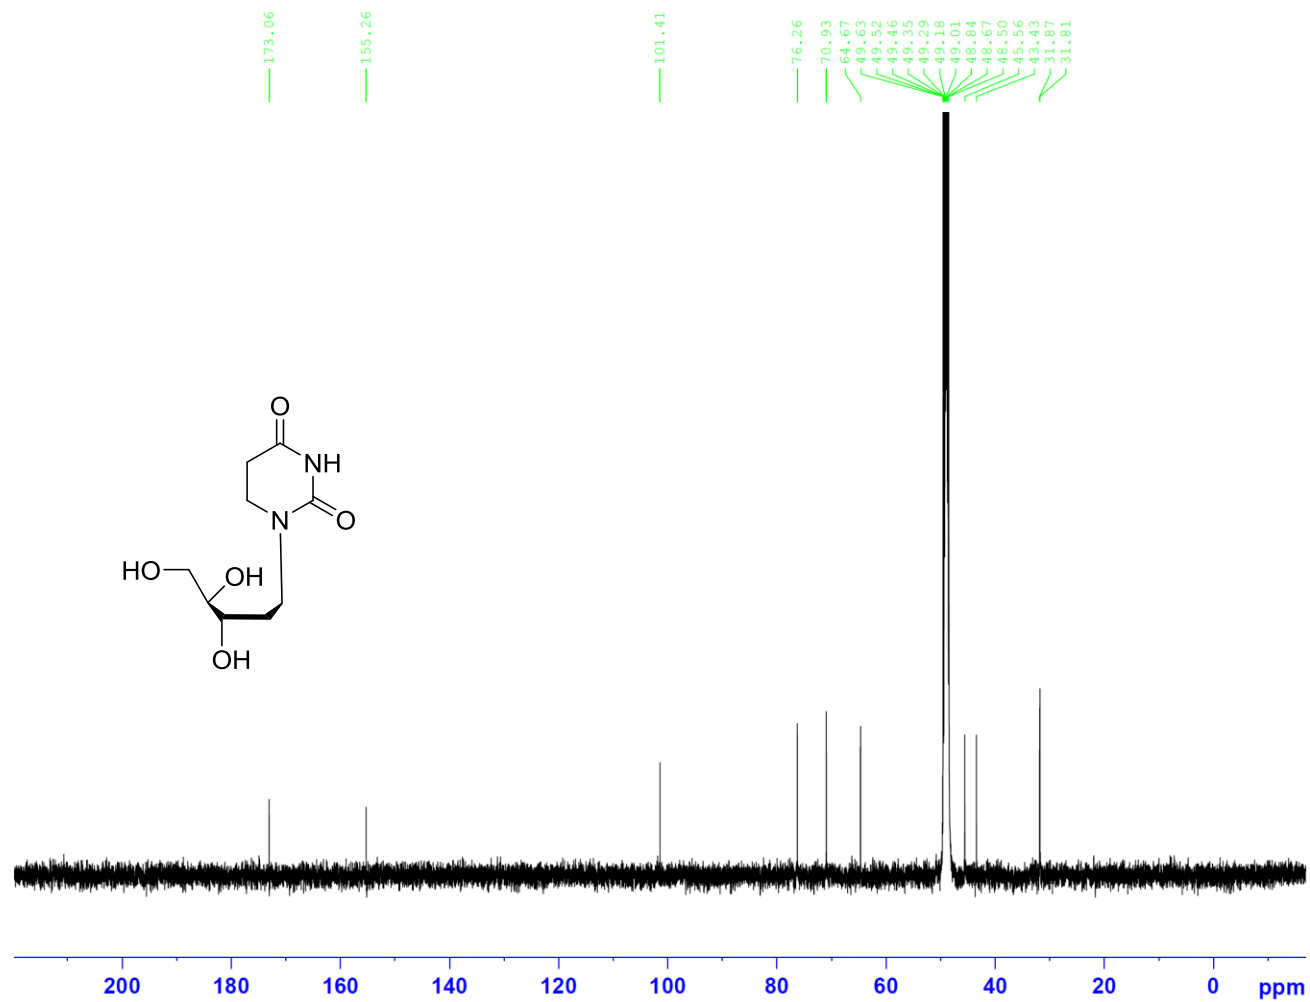

**Figure S40.**  $^{13}\text{C}$  NMR spectrum of compound **5** in Methanol- $d_4$ .

iso64\_DMSO 11252014

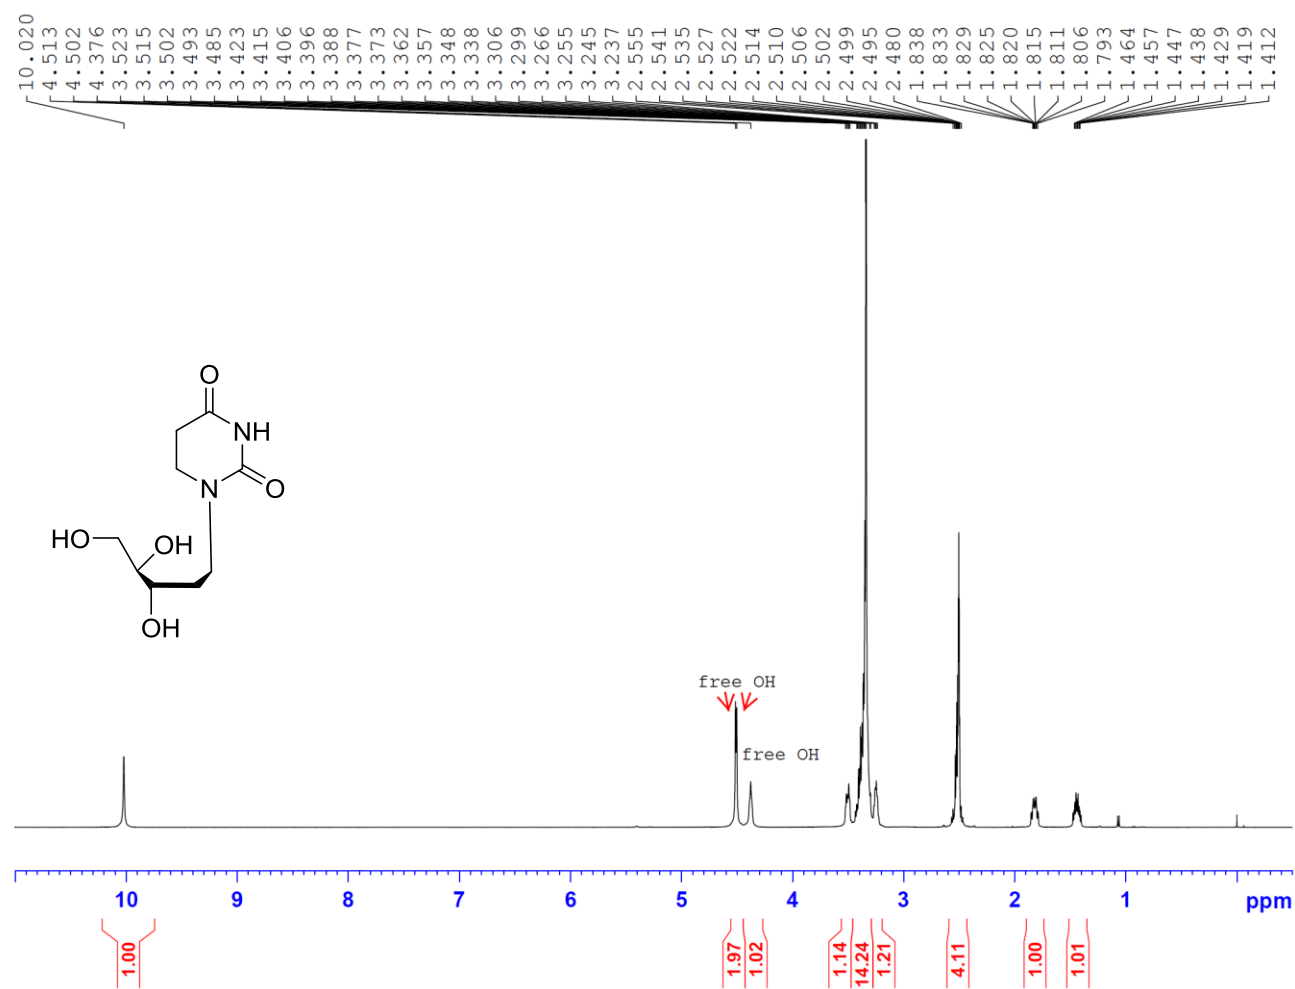

**Figure S41.**  $^1\text{H}$  NMR spectrum of compound **5** in  $\text{DMSO}-d_6$ .

iso64\_DMSO C 11252014

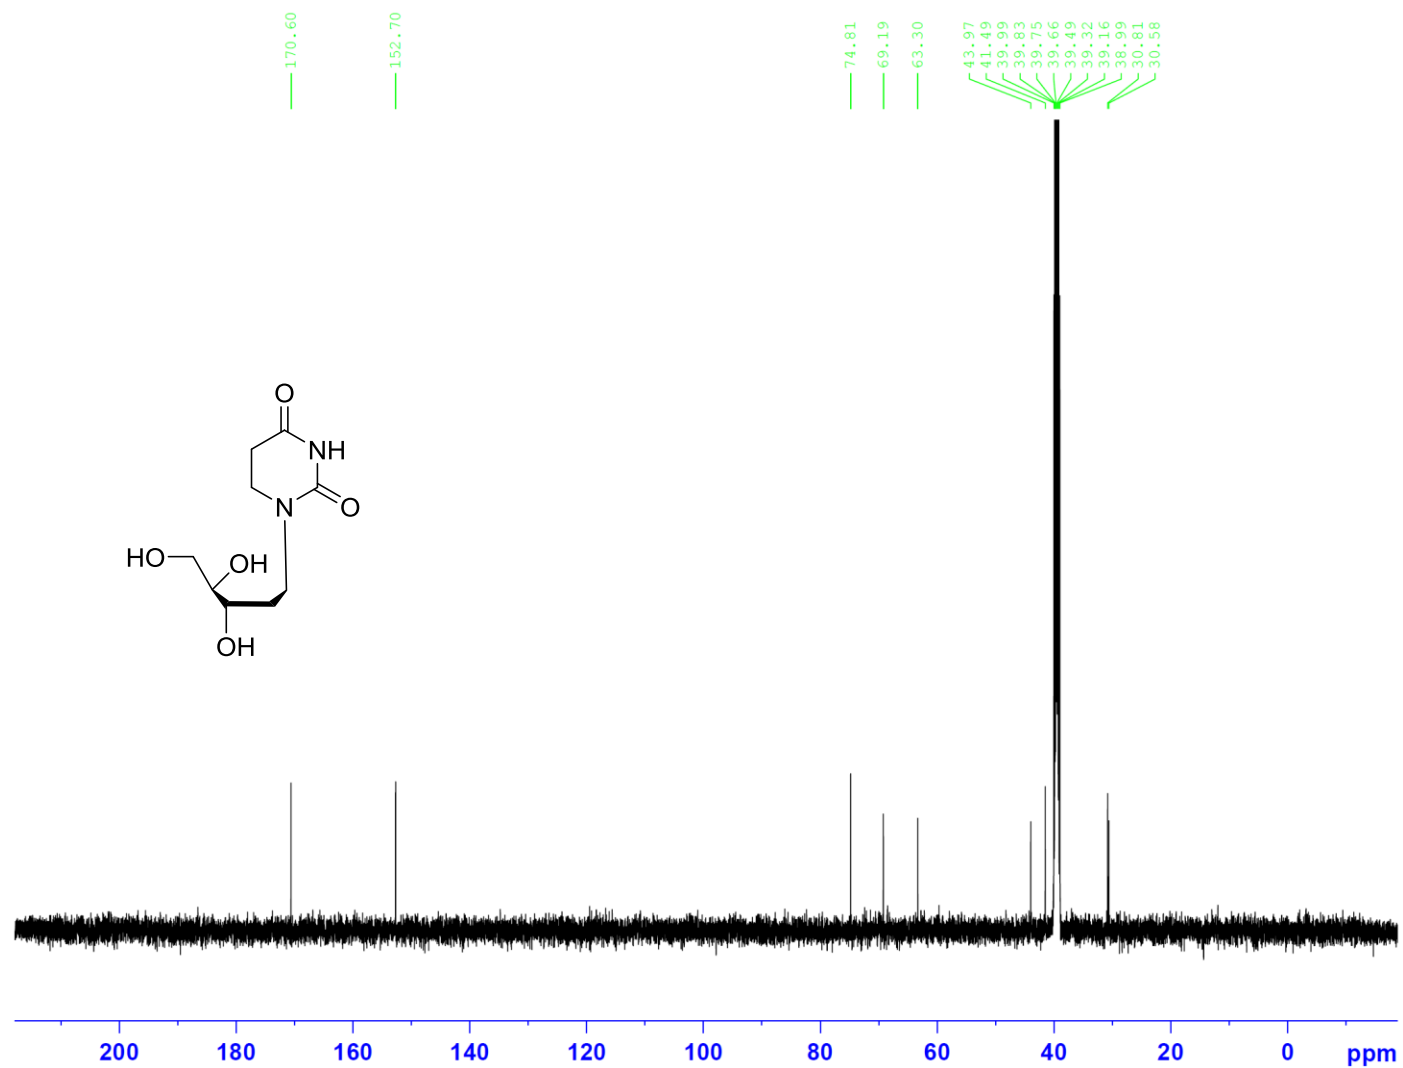

**Figure S42.**  $^{13}\text{C}$  NMR spectrum of compound **5** in  $\text{DMSO-}d_6$ .



iso117\_iso71-1\_MeOD

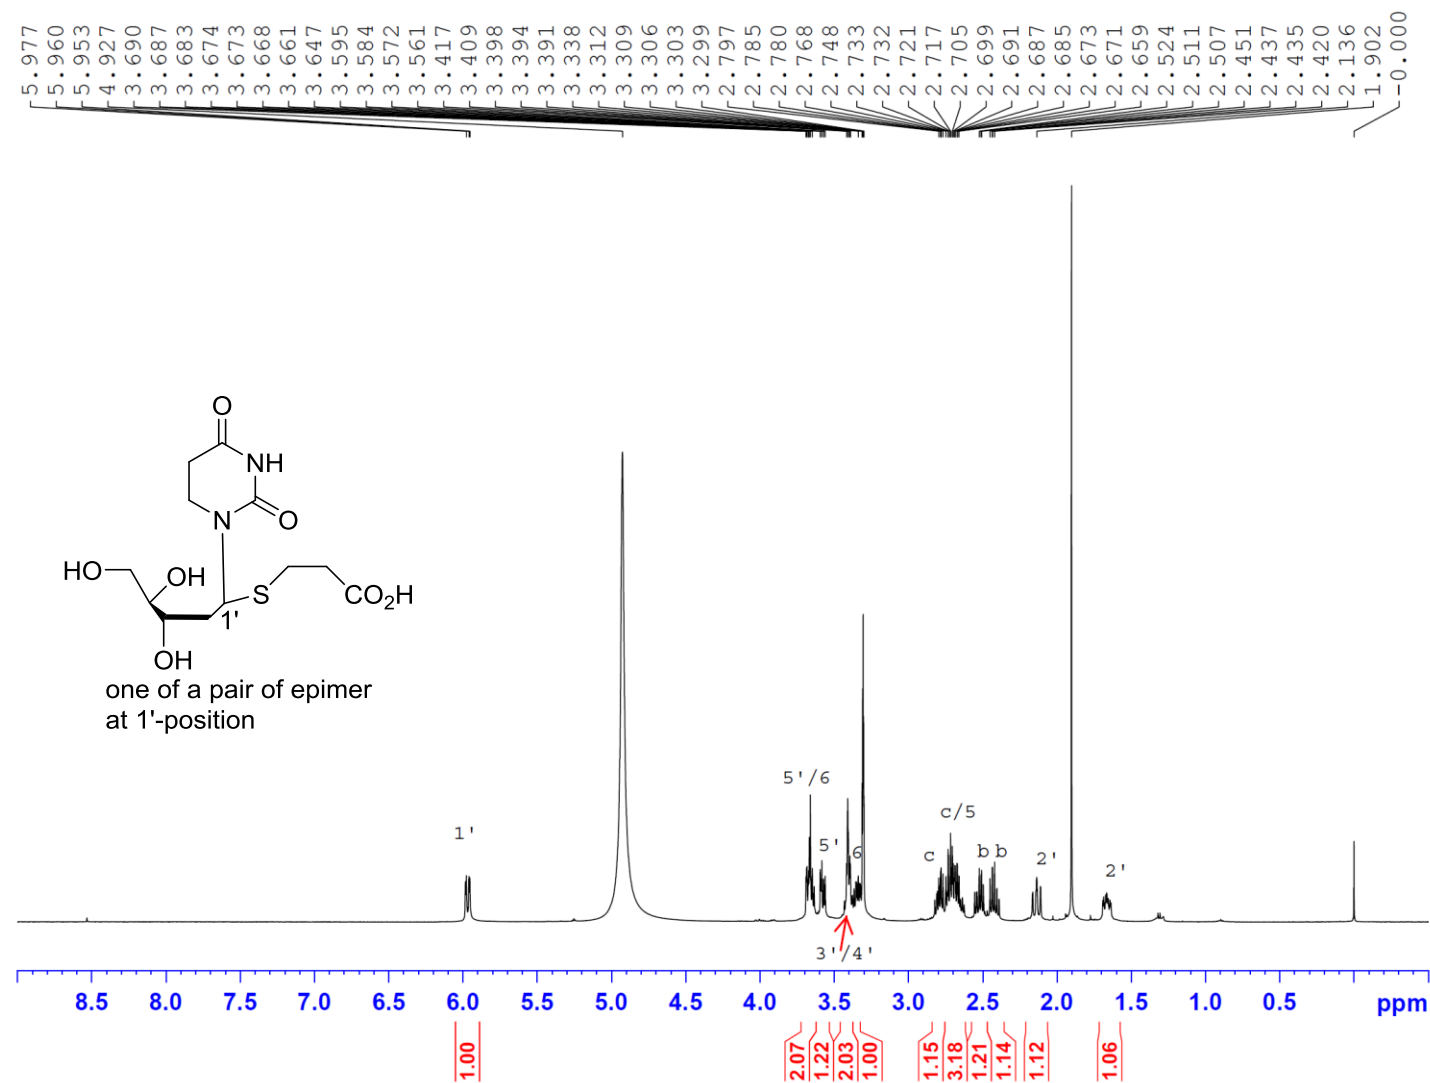

Figure S43. <sup>1</sup>H NMR spectrum of compound 8.

iso117\_iso71-1\_MeOD C

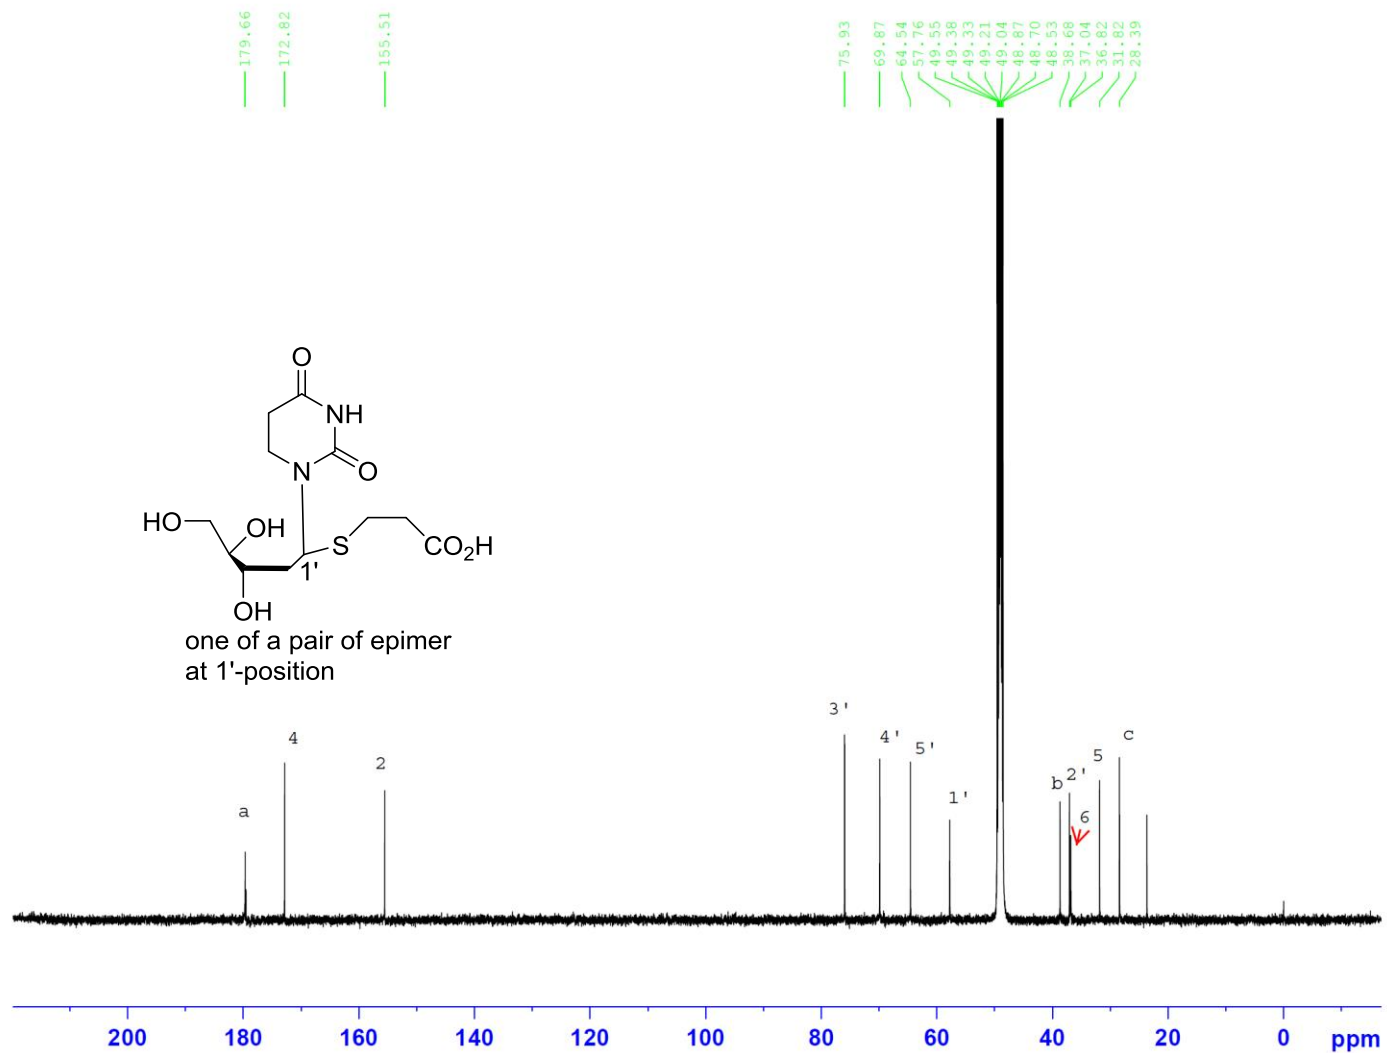

**Figure S44.** <sup>13</sup>C NMR spectrum of compound 8.

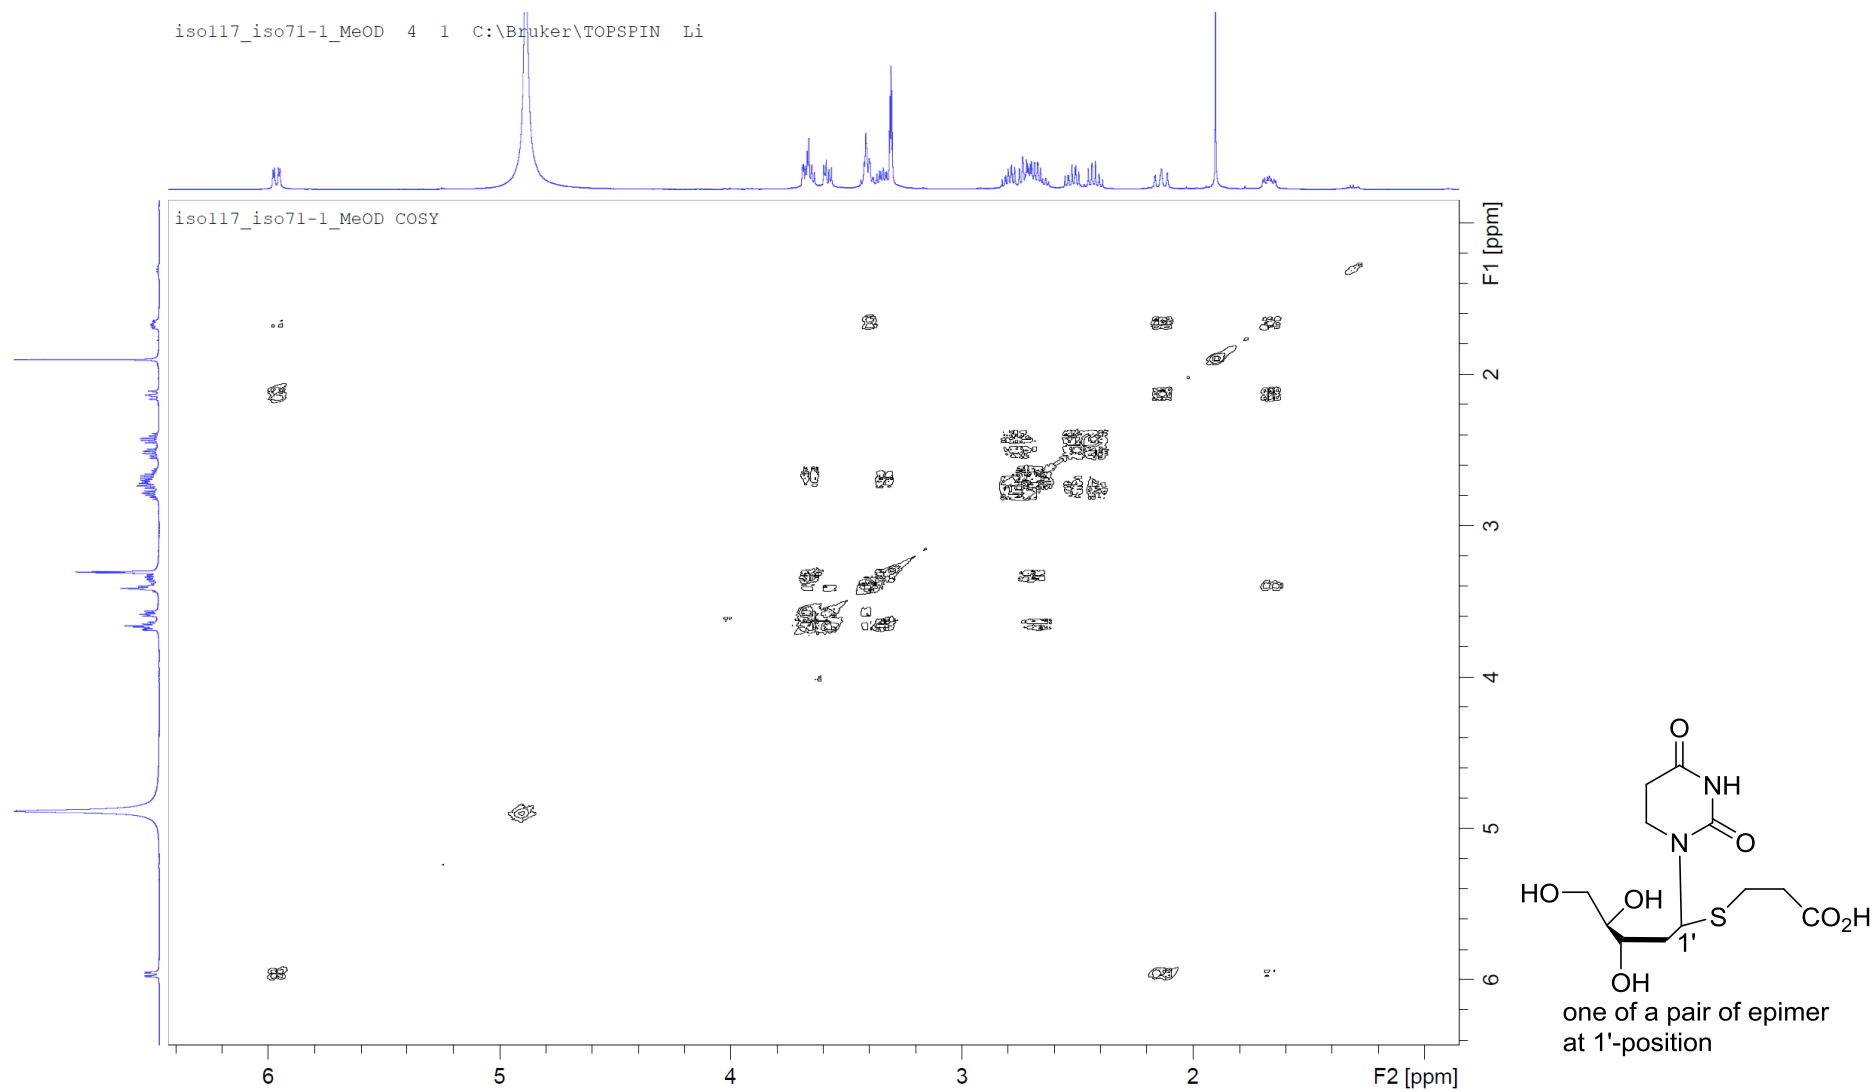

**Figure S45.** COSY spectrum of compound **8**.

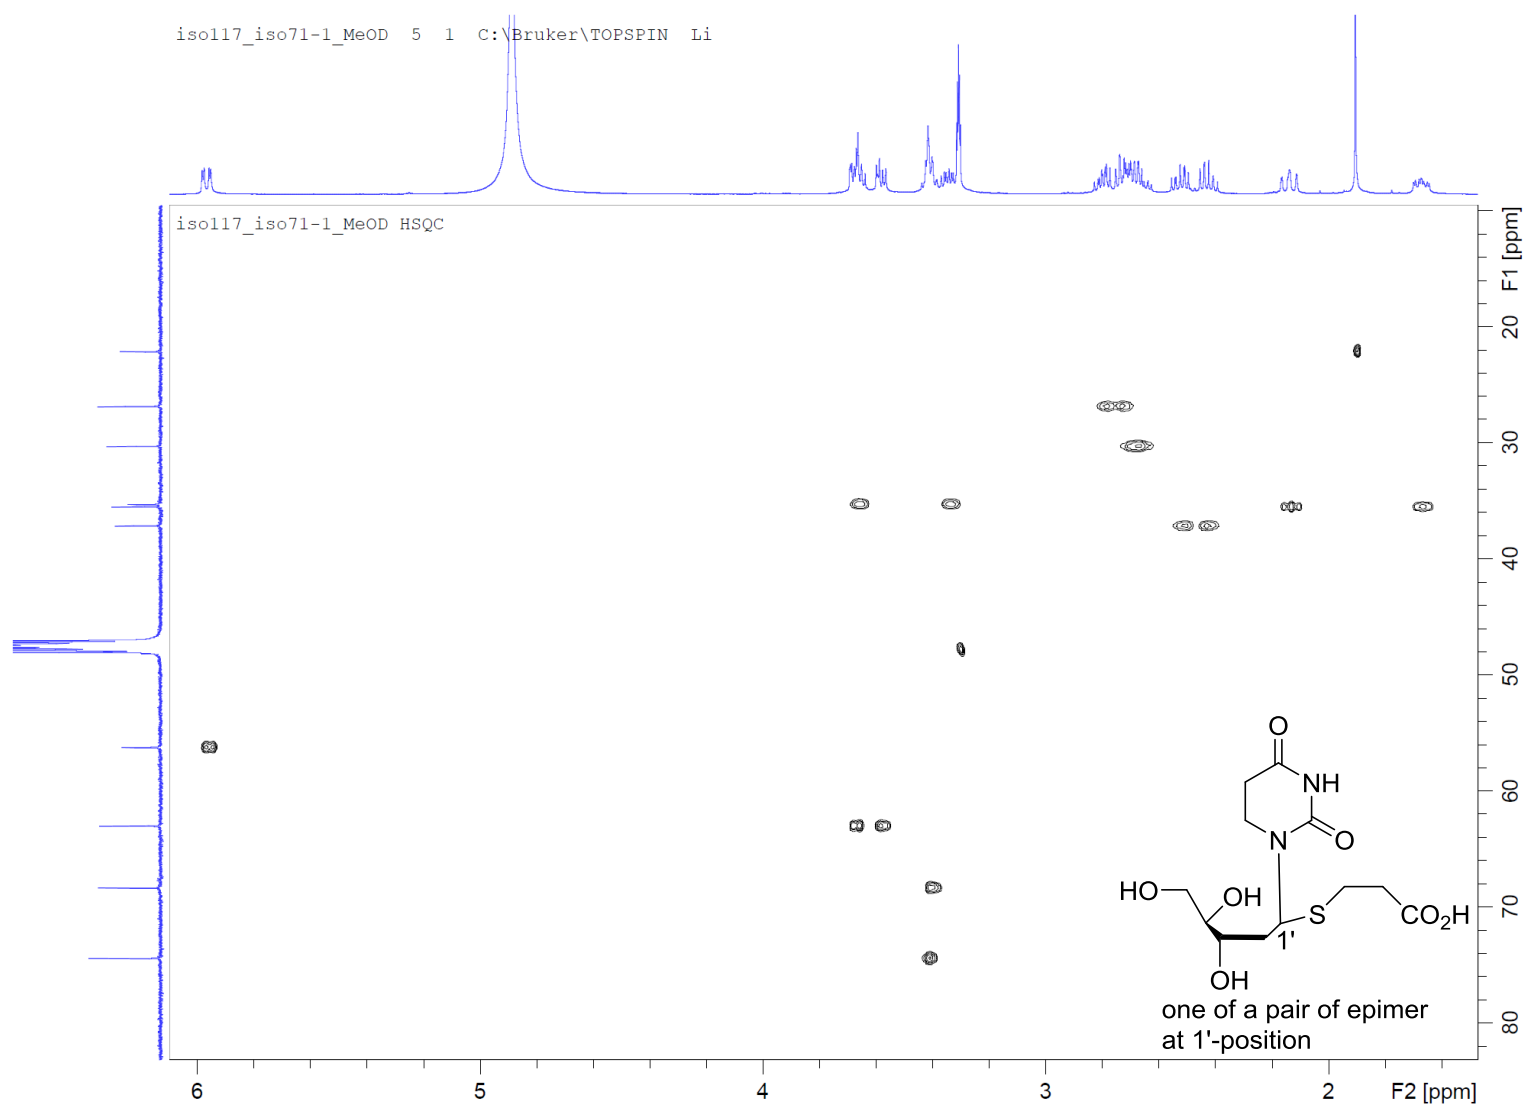

**Figure S46.** HSQC spectrum of compound 8.

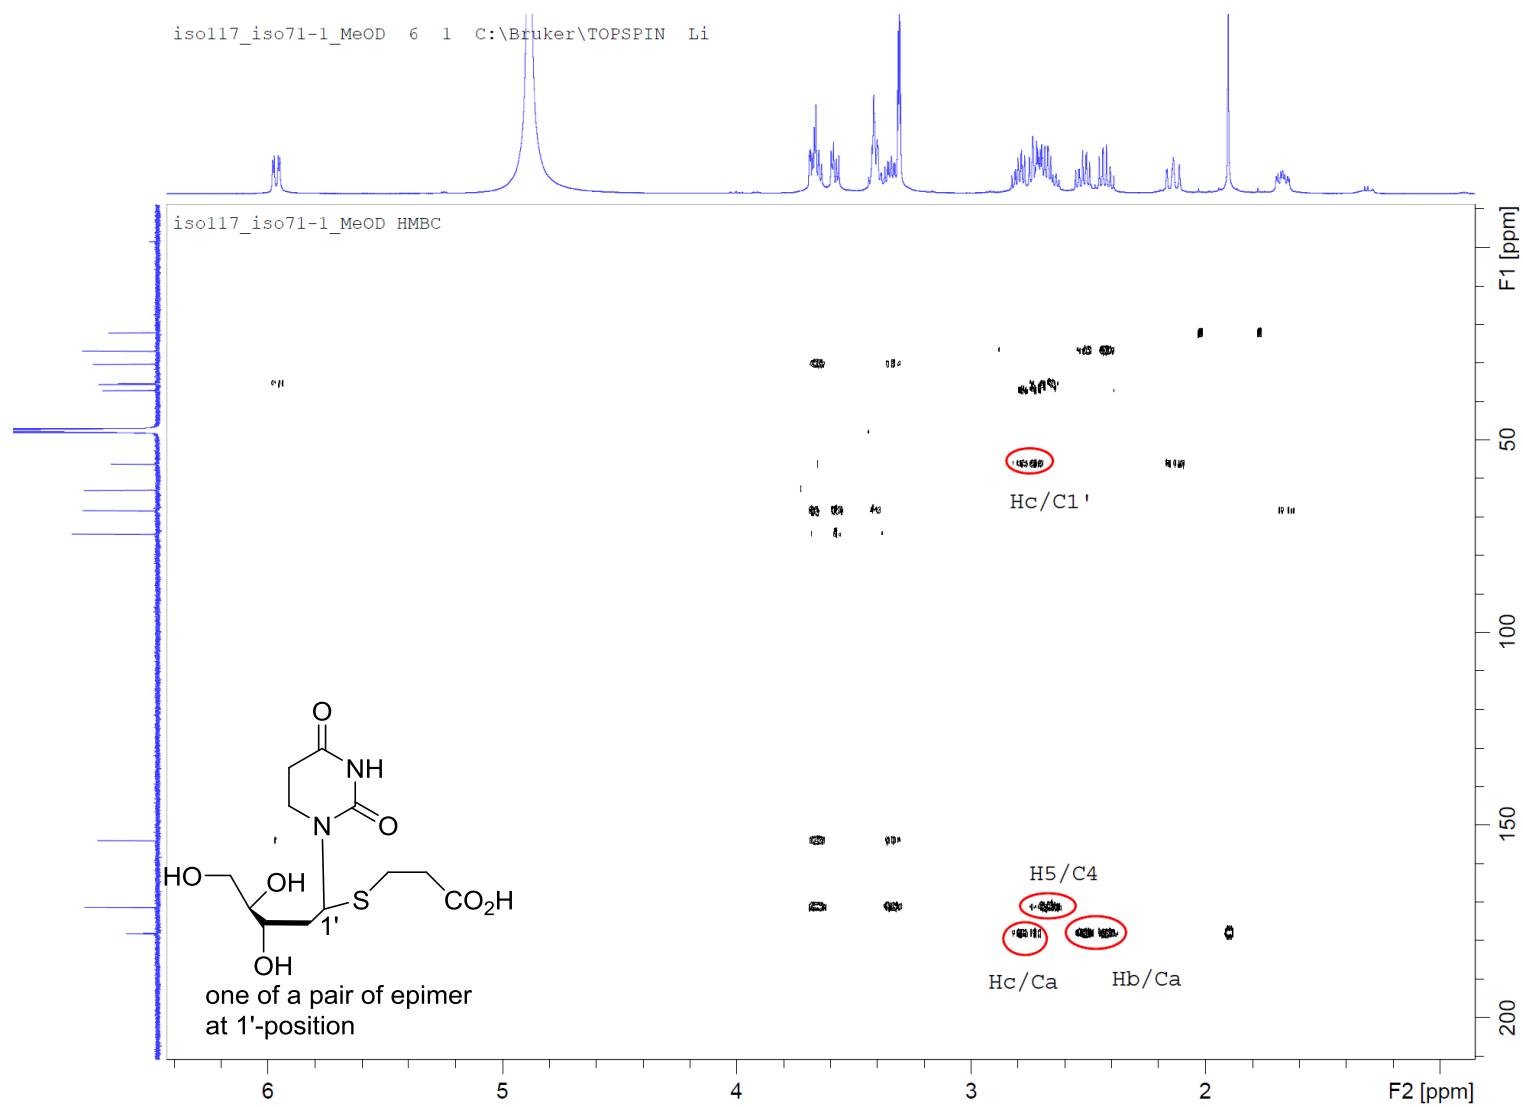

**Figure S47.** HMBC spectrum of compound **8**.

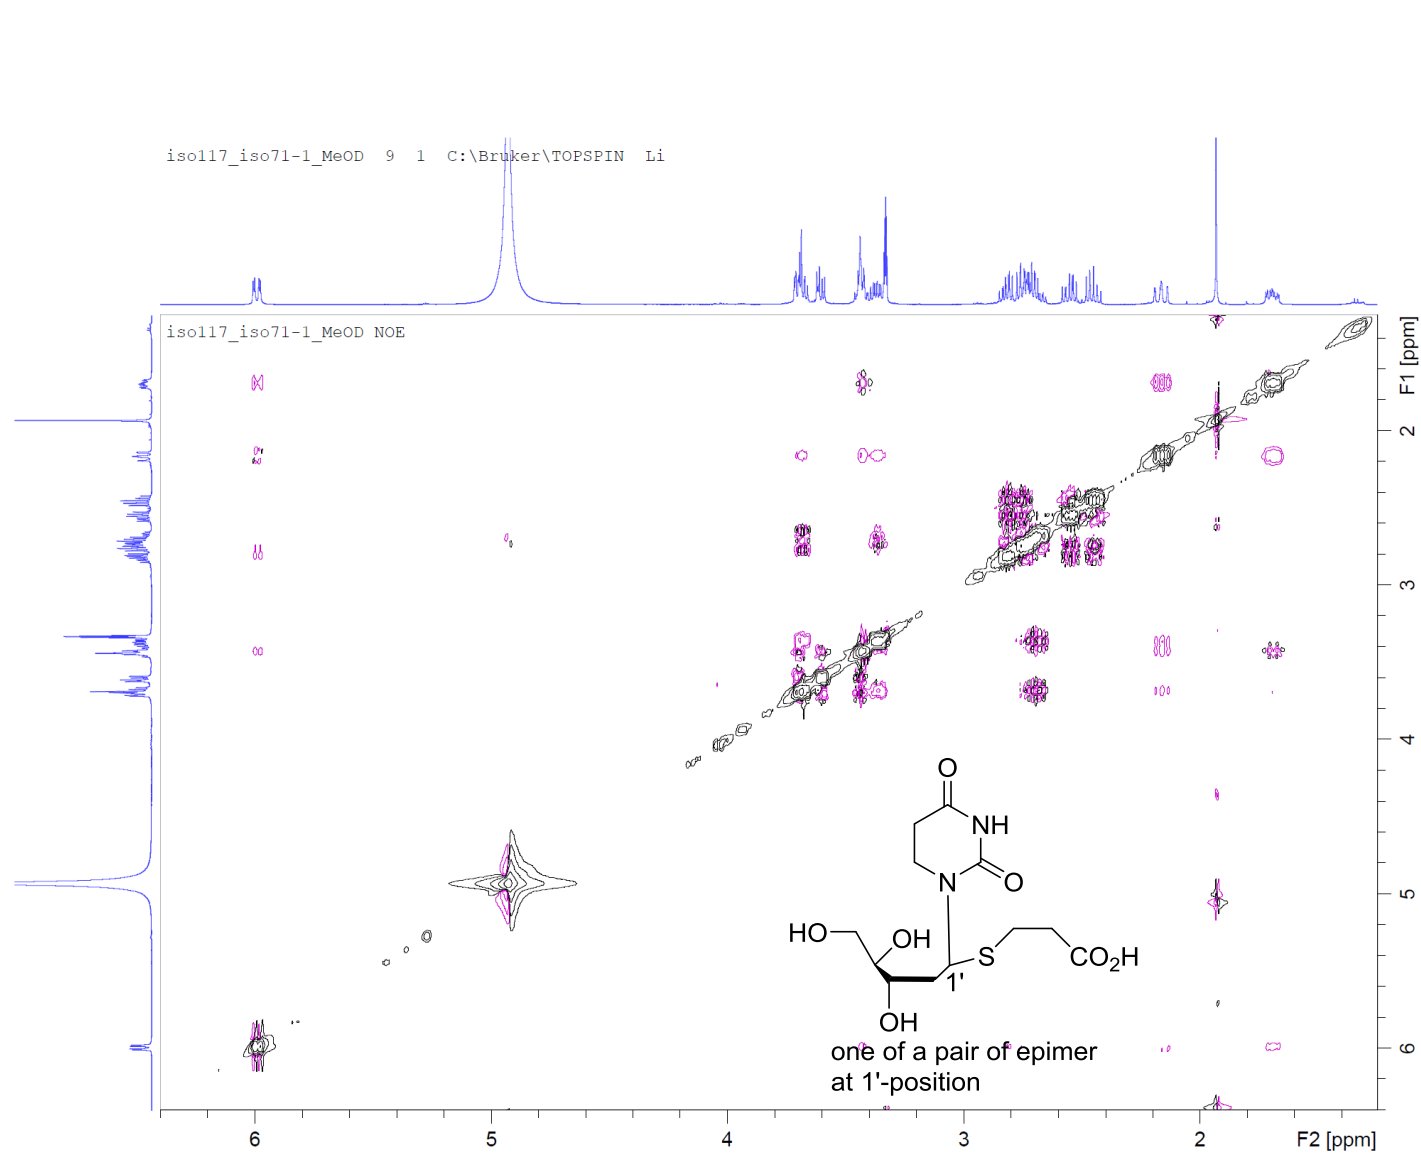

**Figure S48.** NOESY spectrum of compound **8**.

iso116\_iso71-2\_MeOD

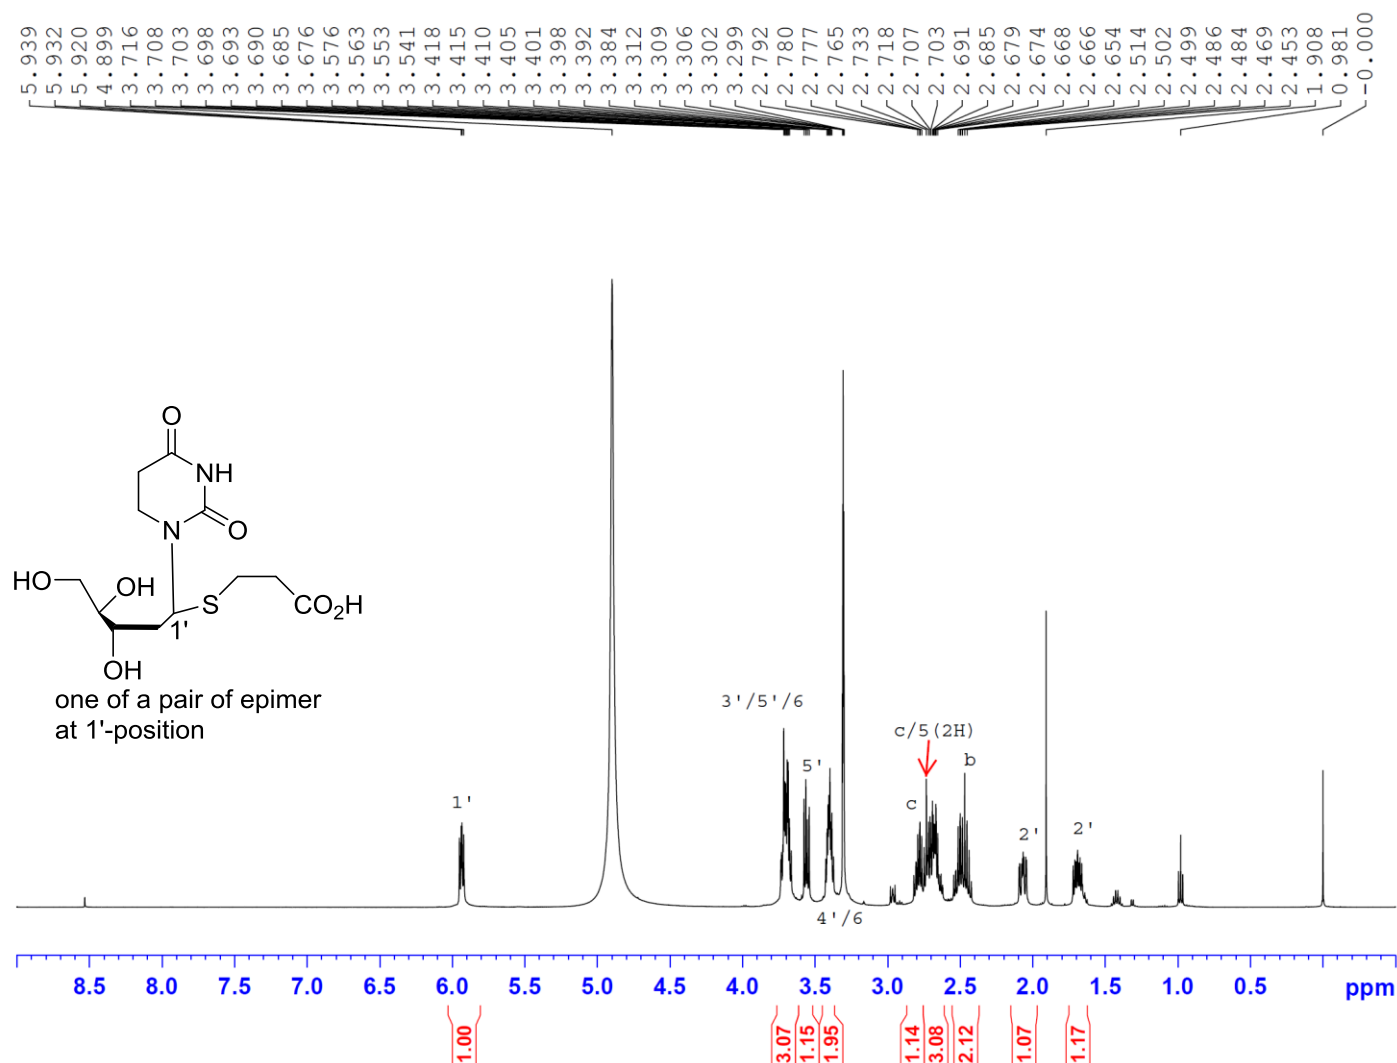

**Figure S49.**  $^1\text{H}$  NMR spectrum of compound **9**.

iso116\_iso71-2\_MeOD C

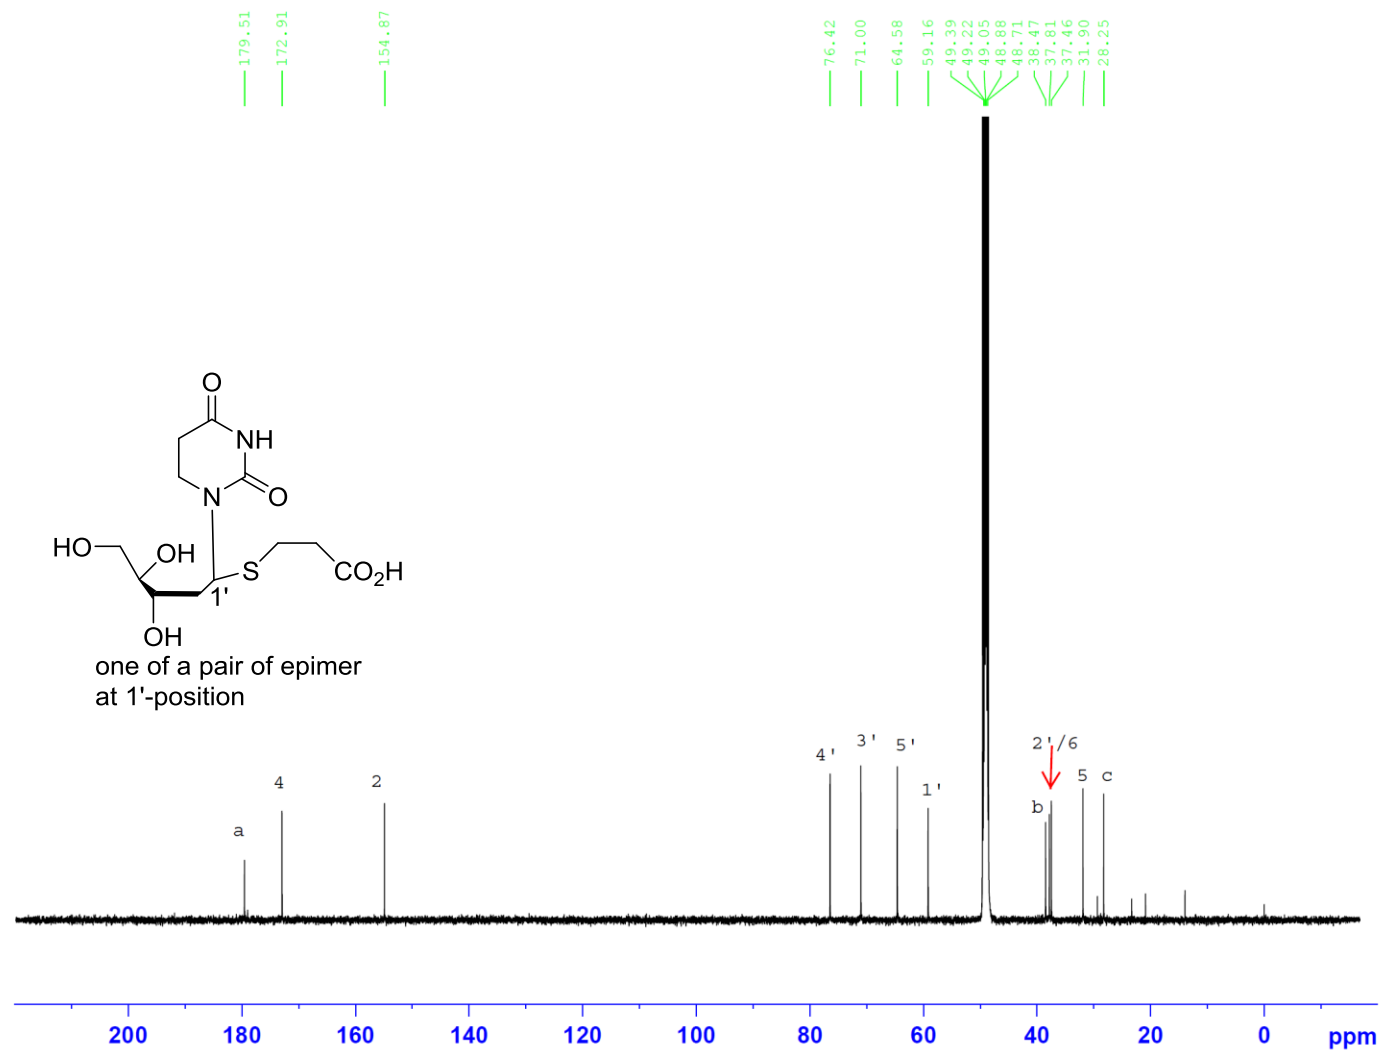

Figure S50. <sup>13</sup>C NMR spectrum of compound 9.



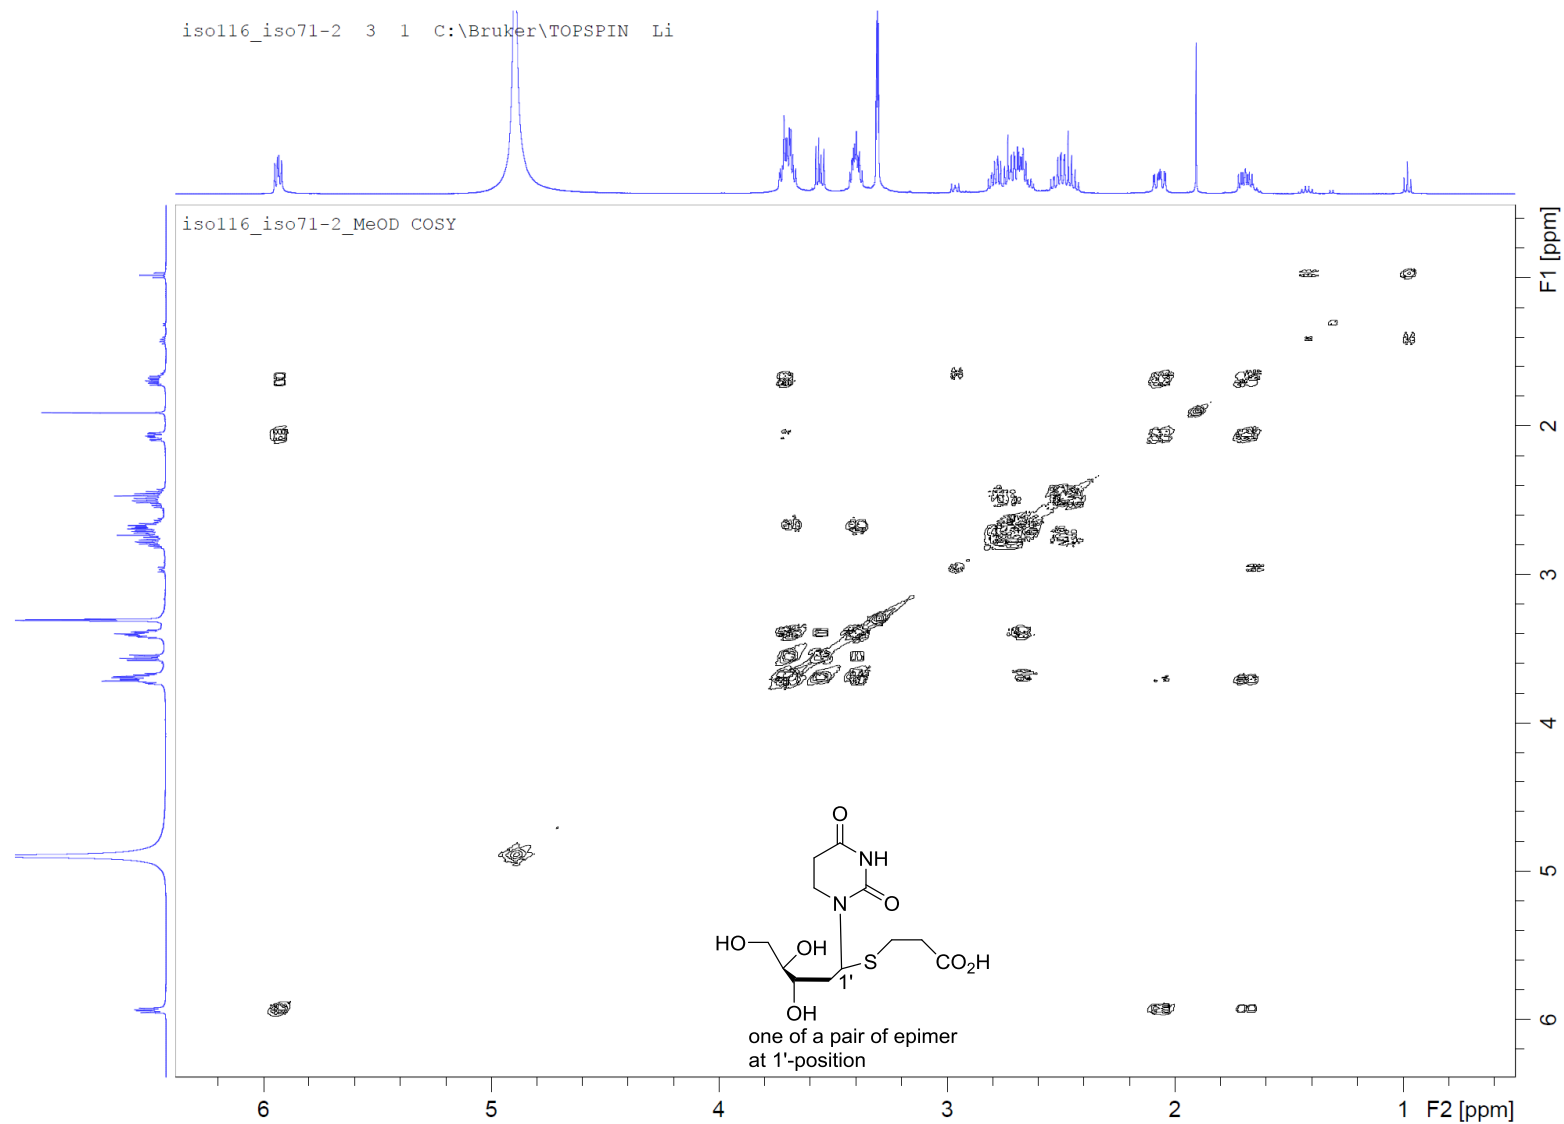

**Figure S51.** COSY spectrum of compound **9**.

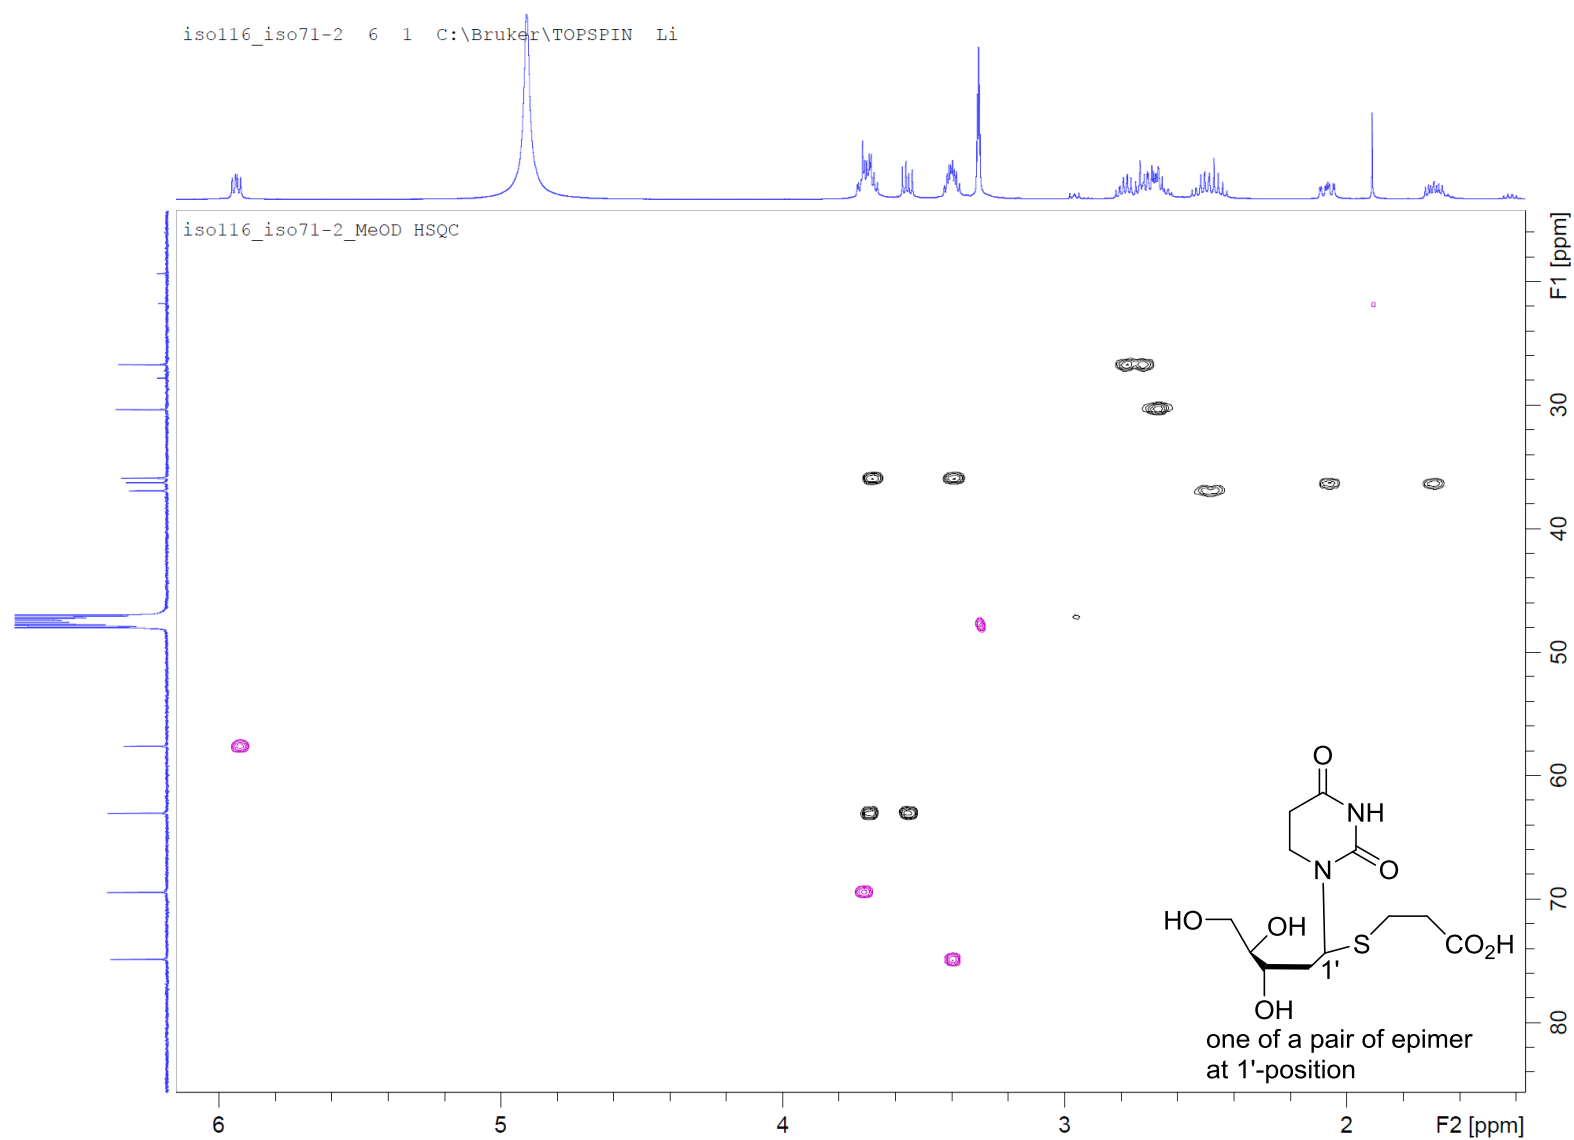

**Figure S52.** HSQC spectrum of compound **9**.

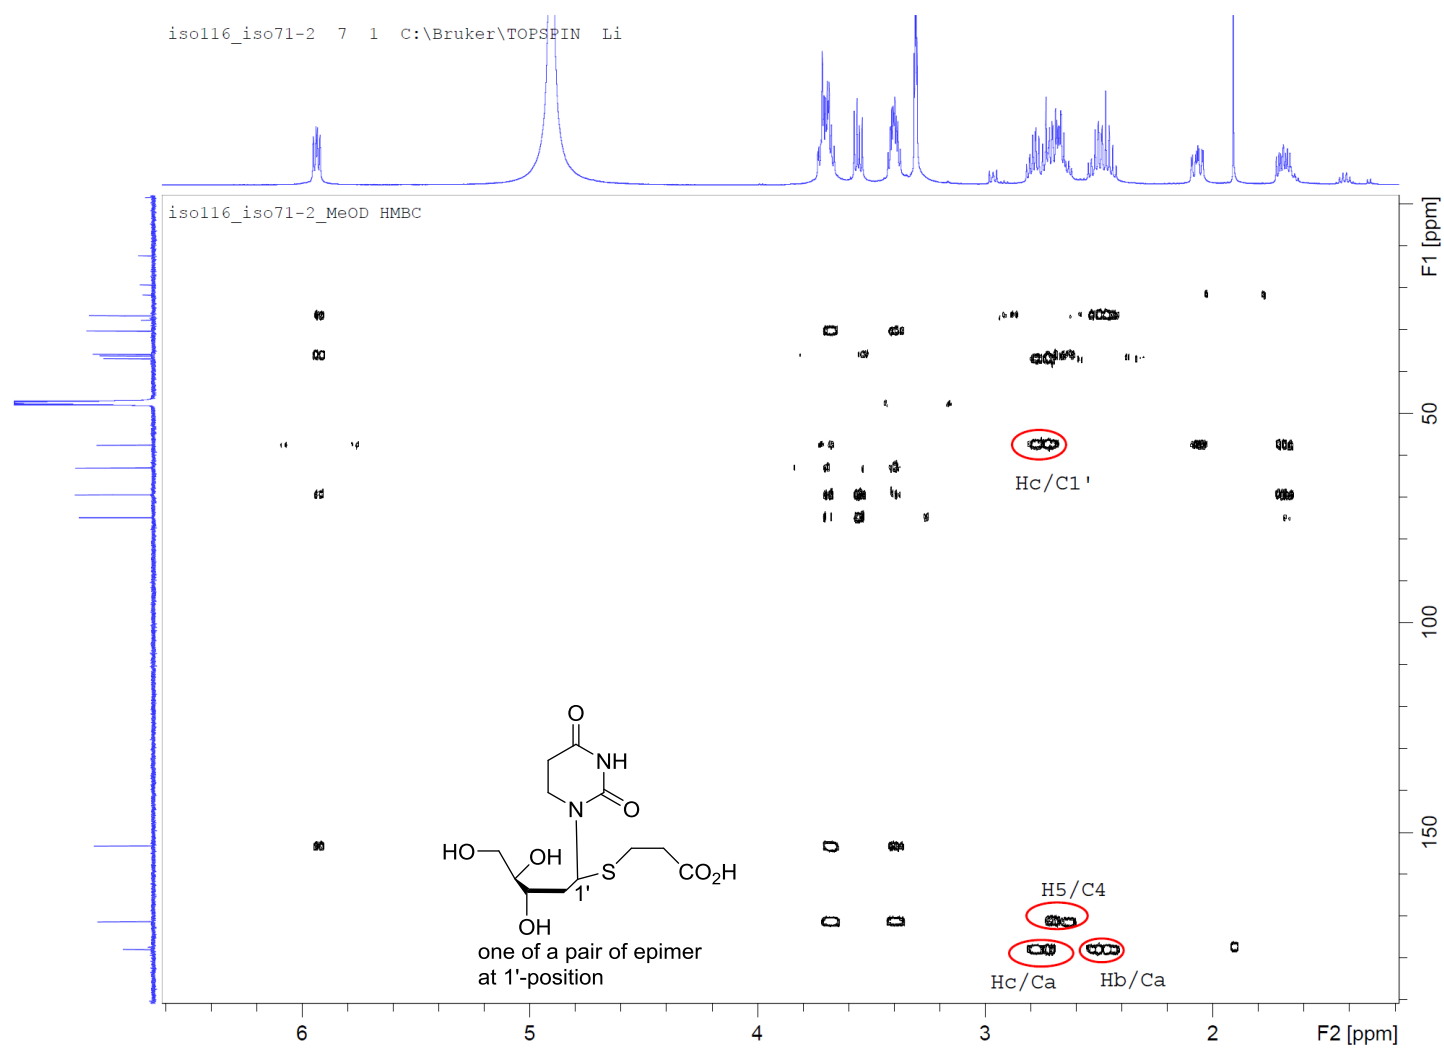

**Figure S53.** HMBC spectrum of compound **9**.

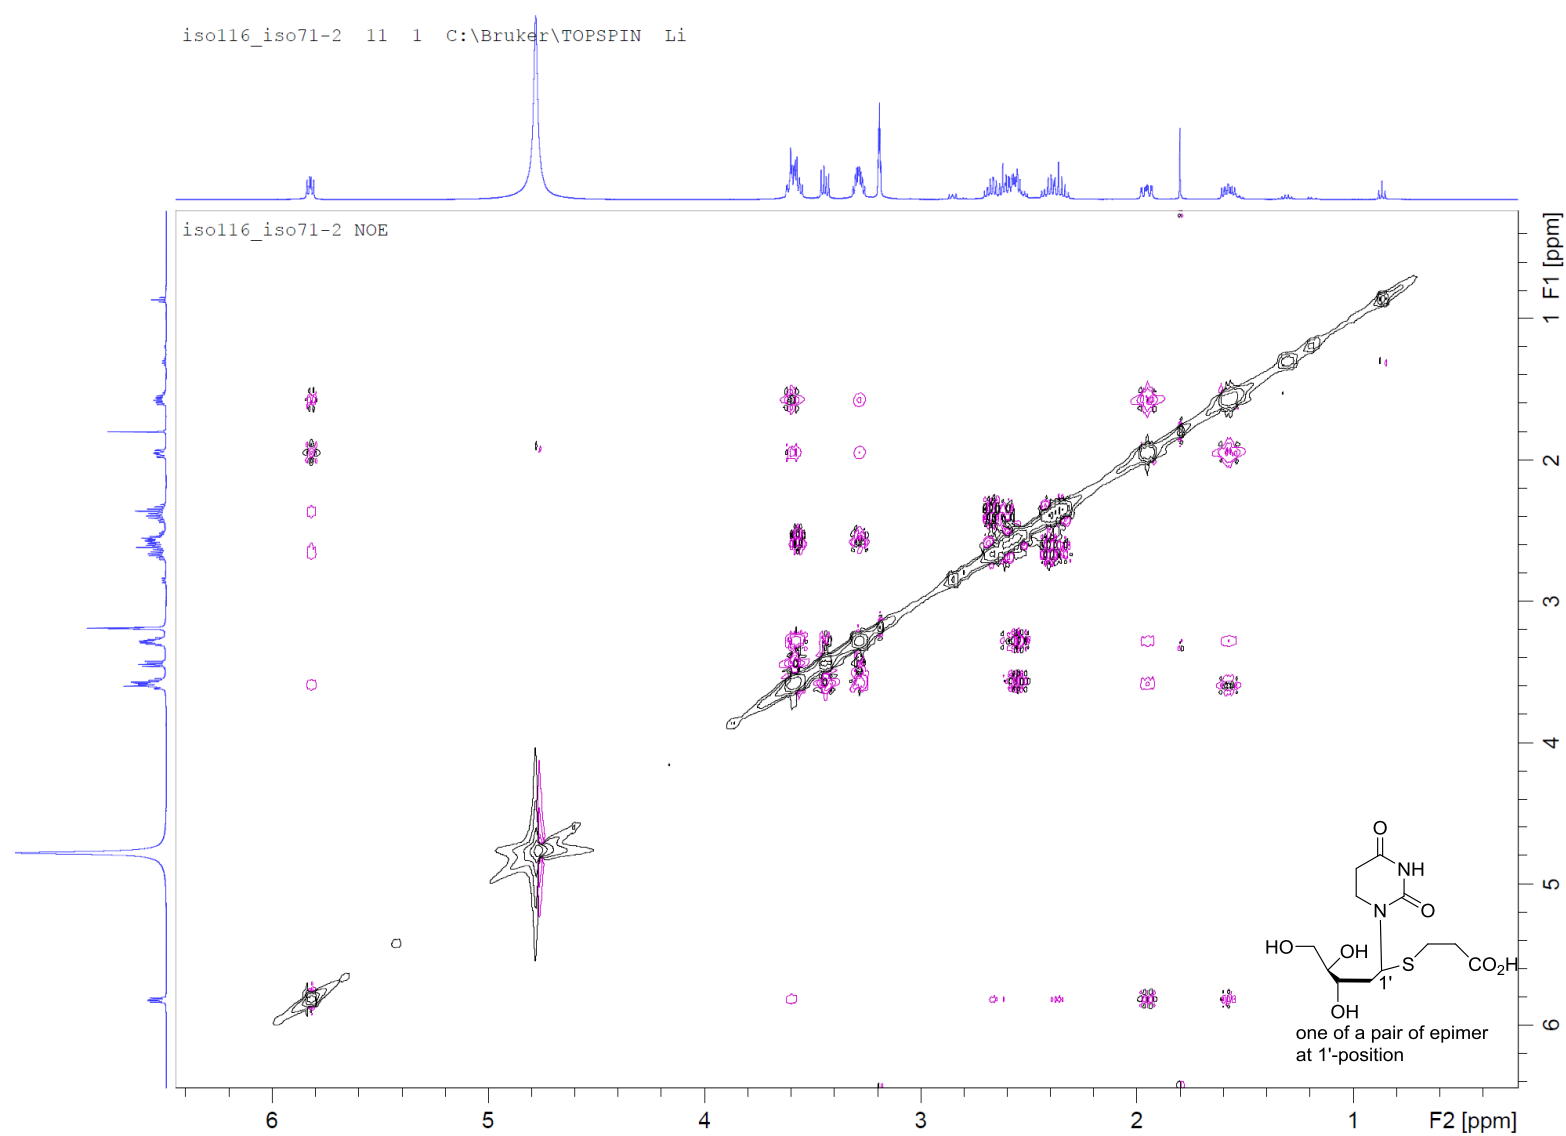

**Figure S54.** NOESY spectrum of compound **9**.
